# Supplementary material for: Plasmodium falciparum parasites deploy RhopH2 into the host erythrocyte to obtain nutrients, grow and replicate
Source: eLife. 2017 Mar 2;6:e23217. doi: 10.7554/eLife.23217 (PMC5365316; doi:10.7554/eLife.23217)
Supplement: Supplementary file 1. — Complete list of putative metabolites identified in this study are shown together with the fold change compared to untreated 3D7 parasites. The relative standard deviation from n = 3 independent biological replicates is also shown (see attached Excel spreadsheet). DOI: http://dx.doi.org/10.7554/eLife.23217.018 [file elife-23217-supp1.xlsx]

## Sheet: Sheet1
						Fold change compared to 3D7 (-GlcN/-Furosemide)				Relative Standard Deviation
Mass	Retention time (min)	Formula	Putative metabolite	Metabolite identification (MSI)	Metabolite class/ Map	3D7 (+GlcN)	RhopH2-HAglmS (-GlcN)	RhopH2-HAglmS (+GlcN)	3D7 (+Furosemide)	3D7 (+GlcN)	RhopH2-HAglmS (-GlcN)	RhopH2-HAglmS (+GlcN)	3D7 (+Furosemide)
119.058	14.2815	C4H9NO3	L-Threonine	Level 1	Amino Acid Metabolism	2.03644	0.889525	7.12851	2.05018	0.231409	0.079562	0.293558	0.244961
155.069	14.5275	C6H9N3O2	L-Histidine	Level 1	Amino Acid Metabolism	1.96584	1.09887	5.3854	2.65525	0.319472	0.216328	0.20465	0.258245
204.09	11.5138	C11H12N2O2	L-Tryptophan	Level 1	Amino Acid Metabolism	2.06777	1.20904	4.54669	0.948849	0.291366	0.121993	0.173962	0.132044
169.085	12.8273	C7H11N3O2	N(pi)-Methyl-L-histidine	Level 1	Amino Acid Metabolism	1.66061	1.01548	3.53347	not detected	0.308782	0.141391	0.233587	NA
105.043	15.6349	C3H7NO3	L-Serine	Level 1	Amino Acid Metabolism	2.95861	1.03908	5.59532	2.05246	0.143382	0.21148	0.0762743	0.176209
132.053	15.1361	C4H8N2O3	L-Asparagine	Level 1	Amino Acid Metabolism	3.0226	1.29193	5.62163	1.83288	0.225434	0.126469	0.181244	0.103992
131.095	11.2385	C6H13NO2	L-Leucine	Level 1	Amino Acid Metabolism	3.66287	1.32923	6.57009	0.622303	0.410464	0.2035	0.231028	0.0885759
146.105	22.3955	C6H14N2O2	L-Lysine	Level 1	Amino Acid Metabolism	1.49737	1.10375	2.48337	1.40848	0.150304	0.224532	0.143439	0.143455
165.079	10.1177	C9H11NO2	L-Phenylalanine	Level 1	Amino Acid Metabolism	3.02969	1.1521	4.22834	0.600471	0.253557	0.110615	0.156304	0.166614
384.122	13.6466	C14H20N6O5S	S-Adenosyl-L-homocysteine	Level 1	Amino Acid Metabolism	2.15484	1.06227	2.94547	2.34497	0.177767	0.163226	0.0751502	0.178755
181.074	12.9134	C9H11NO3	L-Tyrosine	Level 1	Amino Acid Metabolism	3.38119	1.03424	4.59537	1.02592	0.198861	0.0715979	0.0245183	0.174219
89.0477	14.6787	C3H7NO2	L-Alanine	Level 1	Amino Acid Metabolism	1.92125	1.06545	2.49198	0.989318	0.379744	0.0633784	0.203248	0.103944
131.095	10.8044	C6H13NO2	L-Isoleucine	Level 1	Amino Acid Metabolism	3.29594	1.25303	4.00154	0.567399	0.26826	0.0726345	0.11912	0.116658
141.019	15.855	C2H8NO4P	Ethanolamine phosphate	Level 1	Amino Acid Metabolism	1.89946	1.21368	2.30232	2.23298	0.161789	0.191519	0.0914471	0.235076
174.112	23.2717	C6H14N4O2	L-Arginine	Level 1	Amino Acid Metabolism	1.62629	1.04984	1.9225	1.16226	0.191702	0.161462	0.178063	0.0802626
398.137	16.2062	C15H22N6O5S	S-Adenosyl-L-methionine	Level 1	Amino Acid Metabolism	4.82605	0.857958	5.3927	2.55424	0.217086	0.118674	0.116977	0.156776
147.053	14.5481	C5H9NO4	L-Glutamate	Level 1	Amino Acid Metabolism	1.46219	1.0146	1.59629	1.94639	0.226851	0.122505	0.111062	0.0327712
138.043	10.6935	C6H6N2O2	Urocanate	Level 1	Amino Acid Metabolism	0.427962	0.330952	0.448132	0.942284	0.631448	0.563583	0.0982427	0.541678
103.1	19.729	C5H13NO	Choline	Level 1	Amino Acid Metabolism	1.20346	0.789195	1.22566	2.43263	0.202558	0.21373	0.126512	0.1866
146.069	14.8962	C5H10N2O3	L-Glutamine	Level 1	Amino Acid Metabolism	2.07688	0.889617	2.10577	1.19952	0.32292	0.157968	0.104591	0.291923
133.038	14.8409	C4H7NO4	L-Aspartate	Level 1	Amino Acid Metabolism	1.44275	1.16991	1.42614	0.833904	0.0821476	0.0359045	0.159122	0.0743241
132.09	21.6099	C5H12N2O2	L-Ornithine	Level 1	Amino Acid Metabolism	0.961252	0.998499	0.906784	1.02066	0.109208	0.172559	0.109041	0.204418
149.051	11.4595	C5H11NO2S	L-Methionine	Level 1	Amino Acid Metabolism	4.91436	1.18866	4.46294	0.862373	0.338703	0.0566591	0.212101	0.127991
147.053	10.8034	C5H9NO4	O-Acetyl-L-serine	Level 1	Amino Acid Metabolism	1.72421	1.33582	1.53503	not detected	0.309424	0.0227096	0.161342	NA
115.063	12.7394	C5H9NO2	L-Proline	Level 1	Amino Acid Metabolism	2.28733	1.26541	1.92029	0.890762	0.346699	0.158065	0.166558	0.156628
103.063	15.343	C4H9NO2	4-Aminobutanoate	Level 1	Amino Acid Metabolism	2.74523	1.09098	2.10882	9.47047	0.389578	0.0930682	0.203392	0.304306
161.105	13.2513	C7H15NO3	L-Carnitine	Level 1	Amino Acid Metabolism	1.15122	0.949137	0.809247	1.63251	0.387741	0.15326	0.0899648	0.038848
175.096	15.7732	C6H13N3O3	L-Citrulline	Level 1	Amino Acid Metabolism	1.43392	0.966728	0.98704	1.38137	0.384757	0.271037	0.157003	0.0626971
129.079	12.4085	C6H11NO2	L-Pipecolate	Level 1	Amino Acid Metabolism	3.00941	1.61856	1.99236	2.57911	0.478482	0.0461721	0.0975466	0.0849227
131.058	14.3054	C5H9NO3	5-Aminolevulinate	Level 1	Amino Acid Metabolism	1.50766	0.854605	0.997837	1.45402	0.400249	0.267555	0.200888	0.291998
192.064	12.6668	C7H12O6	Quinate	Level 1	Amino Acid Metabolism	1.24912	1.01923	0.783642	not detected	0.371319	0.303294	0.0631051	NA
145.11	13.3192	C7H15NO2	4-Trimethylammoniobutanoate	Level 1	Amino Acid Metabolism	1.35247	0.979269	0.828605	not detected	0.464906	0.237574	0.172618	NA
117.079	11.2845	C5H11NO2	Betaine	Level 1	Amino Acid Metabolism	1.35951	1.04173	0.824259	1.04855	0.573686	0.258227	0.0932989	0.145089
179.058	8.32523	C9H9NO3	Hippurate	Level 1	Amino Acid Metabolism	1.34484	1.10801	0.746986	1.33809	0.480602	0.139048	0.138776	0.168818
131.069	14.5559	C4H9N3O2	Creatine	Level 1	Amino Acid Metabolism	1.31461	0.930216	0.71993	1.14901	0.563485	0.318213	0.133408	0.0557566
182.058	8.89318	C9H10O4	3-(4-Hydroxyphenyl)lactate	Level 1	Amino Acid Metabolism	1.69247	0.920456	0.923755	not detected	0.377754	0.109408	0.185089	NA
113.059	9.75514	C4H7N3O	Creatinine	Level 1	Amino Acid Metabolism	1.20065	0.93502	0.628807	0.932955	0.398657	0.166103	0.208227	0.928604
161.069	14.7024	C6H11NO4	L-2-Aminoadipate	Level 1	Amino Acid Metabolism	23.0348	1.27063	11.9952	not detected	0.164249	0.454893	0.0512929	NA
195.074	16.8949	C6H13NO6	2-Amino-2-deoxy-D-gluconate	Level 1	Carbohydrate Metabolism	462.261	1.42229	804.962	1.50371	0.42522	0.325265	0.154996	0.212515
342.116	15.0951	C12H22O11	Sucrose	Level 1	Carbohydrate Metabolism	0.404342	0.734546	0.574923	not detected	0.120426	0.337208	0.48157	NA
221.09	11.9544	C8H15NO6	N-Acetyl-D-mannosamine	Level 1	Carbohydrate Metabolism	3.73221	1.17853	4.8832	1.20975	0.363632	0.0903434	0.150984	0.0804486
106.027	11.8476	C3H6O4	D-Glycerate	Level 1	Carbohydrate Metabolism	0.976297	0.797271	1.24454	not detected	0.372671	0.217008	0.706707	NA
607.082	15.0028	C17H27N3O17P2	UDP-N-acetyl-D-galactosamine	Level 1	Carbohydrate Metabolism	14.7002	1.12825	17.3306	1.42515	0.1687	0.185175	0.0845245	0.0494223
150.017	17.2543	C4H6O6	(R,R)-Tartaric acid	Level 1	Carbohydrate Metabolism	1.02989	1.00532	1.07952	not detected	0.111961	0.0298106	0.0694285	NA
150.016	16.5357	C4H6O6	meso-Tartaric acid	Level 1	Carbohydrate Metabolism	0.981851	1.06219	0.998446	not detected	0.0803373	0.0859205	0.0550599	NA
134.022	15.8967	C4H6O5	(S)-Malate	Level 1	Carbohydrate Metabolism	2.89805	1.10082	2.8822	not detected	0.404125	0.0769146	0.15009	NA
605.077	17.9411	C16H25N5O16P2	GDP-mannose	Level 1	Carbohydrate Metabolism	1.00457	1.0763	0.956853	1.29636	0.196631	0.334928	0.187086	0.19598
276.025	17.0012	C6H13O10P	6-Phospho-D-gluconate	Level 1	Carbohydrate Metabolism	1.14359	1.16111	1.02151	1.12543	0.273893	0.666906	0.196513	0.348713
192.027	18.0329	C6H8O7	Citrate	Level 1	Carbohydrate Metabolism	1.18725	0.912433	0.940527	not detected	0.119195	0.290918	0.0888506	NA
566.055	16.1708	C15H24N2O17P2	UDP-glucose	Level 1	Carbohydrate Metabolism	0.775619	0.952265	0.61045	1.30314	0.0795673	0.182723	0.0875771	0.296231
196.058	13.9103	C6H12O7	D-Gluconic acid	Level 1	Carbohydrate Metabolism	1.3669	0.867114	0.933189	not detected	0.256115	0.112137	0.0515268	NA
260.03	16.9601	C6H13O9P	D-Glucose 6-phosphate	Level 1	Carbohydrate Metabolism	1.7412	1.20492	1.07087	0.953246	0.0641647	0.243756	0.0295032	0.132542
182.079	13.9171	C6H14O6	Mannitol	Level 1	Carbohydrate Metabolism	1.18539	0.930569	0.681008	1.40861	0.367591	0.259434	0.0789494	0.433333
185.993	16.859	C3H7O7P	3-Phospho-D-glycerate	Level 1	Carbohydrate Metabolism	1.08811	0.863926	0.492259	1.2054	0.0830954	0.21683	0.0611901	0.153243
230.019	15.3217	C5H11O8P	D-Ribose 5-phosphate	Level 1	Carbohydrate Metabolism	1.57408	1.11939	0.705363	1.49531	0.216515	0.192406	0.079841	0.110194
167.982	17.4082	C3H5O6P	Phosphoenolpyruvate	Level 1	Carbohydrate Metabolism	0.788245	0.735009	0.308992	0.284429	0.179095	0.455571	0.110502	1.29431
424.037	14.604	C12H18N4O7P2S	Thiamin diphosphate	Level 1	Carbohydrate Metabolism	1.93137	1.07357	0.632552	0.870809	0.183528	0.116859	0.0875038	0.198975
364.042	17.8538	C10H13N4O9P	Xanthosine 5'-phosphate	Level 1	Nucleotide Metabolism	0.654141	1.0984	0.928486	0.469218	0.0596062	0.483216	0.212124	0.241068
404.002	16.3586	C9H14N2O12P2	UDP	Level 1	Nucleotide Metabolism	0.944379	1.22357	1.27761	1.33315	0.203122	0.489026	0.0936911	0.183104
403.018	16.9263	C9H15N3O11P2	CDP	Level 1	Nucleotide Metabolism	0.938965	1.14921	1.25864	1.79453	0.171319	0.41946	0.0333718	0.311875
348.047	15.3407	C10H13N4O8P	IMP	Level 1	Nucleotide Metabolism	0.977251	1.01207	1.14955	0.778541	0.0810164	0.219105	0.13462	0.133295
559.072	14.6831	C15H23N5O14P2	ADP-ribose	Level 1	Nucleotide Metabolism	1.44835	1.09287	1.58648	1.30852	0.230296	0.168341	0.0501889	0.198315
135.055	9.60267	C5H5N5	Adenine	Level 1	Nucleotide Metabolism	3.2164	0.899314	3.40766	1.8848	0.17844	0.428332	0.168625	0.237758
443.024	17.8664	C10H15N5O11P2	GDP	Level 1	Nucleotide Metabolism	1.10216	1.22848	1.08822	1.58887	0.227215	0.58921	0.105353	0.359217
243.086	11.8766	C9H13N3O5	Cytidine	Level 1	Nucleotide Metabolism	0.646384	1.17016	0.63655	0.706627	0.399251	0.0892681	0.156019	0.218722
347.063	15.0083	C10H14N5O7P	dGMP	Level 1	Nucleotide Metabolism	1.22959	1.20006	1.17611	not detected	0.114436	0.254802	0.0193057	NA
323.052	15.7509	C9H14N3O8P	CMP	Level 1	Nucleotide Metabolism	1.06717	1.13321	0.997158	1.4182	0.302138	0.243003	0.17982	0.186838
324.036	15.0367	C9H13N2O9P	UMP	Level 1	Nucleotide Metabolism	1.23183	1.10727	1.13459	1.00045	0.139763	0.0939835	0.115491	0.111563
483.969	17.9914	C9H15N2O15P3	UTP	Level 1	Nucleotide Metabolism	1.50514	1.25458	1.35724	1.54435	0.358756	0.655212	0.300668	0.42184
267.097	9.13408	C10H13N5O4	Adenosine	Level 1	Nucleotide Metabolism	0.942681	1.00255	0.837412	1.12004	0.401197	0.0979352	0.308068	0.308705
151.049	12.2602	C5H5N5O	Guanine	Level 1	Nucleotide Metabolism	1.45198	1.22535	1.28164	1.13684	0.256171	0.110832	0.277081	0.348762
411.034	14.2386	C10H15N5O9P2	dADP	Level 1	Nucleotide Metabolism	1.96209	1.10394	1.70778	not detected	0.140801	0.176095	0.0282715	NA
329.052	9.52915	C10H12N5O6P	3',5'-Cyclic AMP	Level 1	Nucleotide Metabolism	1.76103	0.997149	1.39281	3.58618	0.0311678	0.0710028	0.11767	0.422759
244.069	9.82782	C9H12N2O6	Uridine	Level 1	Nucleotide Metabolism	1.10296	1.06005	0.82844	0.129073	0.257578	0.293297	0.52318	0.970354
347.063	13.719	C10H14N5O7P	AMP	Level 1	Nucleotide Metabolism	1.06915	1.05374	0.801931	not detected	0.186142	0.101664	0.101255	NA
136.039	10.1679	C5H4N4O	Hypoxanthine	Level 1	Nucleotide Metabolism	1.24813	1.21114	0.908864	not detected	0.247745	0.228137	0.31007	NA
363.058	16.5817	C10H14N5O8P	GMP	Level 1	Nucleotide Metabolism	1.03579	1.07007	0.69179	1.24427	0.104542	0.158395	0.138912	0.21914
307.058	14.7586	C9H14N3O7P	dCMP	Level 1	Nucleotide Metabolism	2.08923	1.15616	1.19625	1.60913	0.208574	0.152421	0.122546	0.227987
268.081	10.9128	C10H12N4O5	Inosine	Level 1	Nucleotide Metabolism	2.42964	1.42786	1.32509	0.57037	0.448763	0.11403	0.284808	0.256874
428.013	16.7019	C10H14N4O11P2	IDP	Level 1	Nucleotide Metabolism	1.27232	0.986477	0.682735	not detected	0.180629	0.252695	0.335103	NA
168.028	12.536	C5H4N4O3	Urate	Level 1	Nucleotide Metabolism	1.84418	0.91275	0.953558	not detected	0.337532	0.223975	0.250483	NA
322.057	12.9485	C10H15N2O8P	dTMP	Level 1	Nucleotide Metabolism	1.95575	1.12648	0.945812	1.04375	0.0117603	0.100861	0.069116	0.317013
283.092	12.5582	C10H13N5O5	Guanosine	Level 1	Nucleotide Metabolism	3.39098	1.40342	1.62891	2.10059	0.483391	0.209368	0.130646	0.293195
387.023	16.0136	C9H15N3O10P2	dCDP	Level 1	Nucleotide Metabolism	3.07326	1.45354	1.41478	0.920129	0.0561592	0.342512	0.0572189	0.339241
156.017	10.0765	C5H4N2O4	Orotate	Level 1	Nucleotide Metabolism	0.976027	1.07242	0.279235	not detected	0.33014	0.13685	0.349109	NA
158.033	11.0753	C5H6N2O4	(S)-Dihydroorotate	Level 1	Nucleotide Metabolism	1.3432	1.08797	0.296139	1.16856	0.30763	0.127097	0.0307355	0.579425
785.157	11.4574	C27H33N9O15P2	FAD	Level 1	Metabolism of Cofactors and Vitamins	1.19083	1.22151	1.2054	1.66343	0.128855	0.269536	0.0596172	0.267761
123.032	7.7796	C6H5NO2	Nicotinate	Level 1	Metabolism of Cofactors and Vitamins	1.8798	1.05155	1.7205	0.639402	0.363367	0.251718	0.0697307	0.464653
169.074	8.08978	C8H11NO3	Pyridoxine	Level 1	Metabolism of Cofactors and Vitamins	1.47986	1.10505	0.995755	1.00032	0.175283	0.0860994	0.307722	0.149258
167.058	8.12949	C8H9NO3	Pyridoxal	Level 1	Metabolism of Cofactors and Vitamins	2.71379	0.914114	1.51573	2.36429	0.260821	0.123569	0.37624	0.258315
344.071	14.1412	C12H17N4O4PS	Thiamin monophosphate	Level 1	Metabolism of Cofactors and Vitamins	3.32406	1.25025	0.858951	not detected	0.299794	0.538853	0.142507	NA
144.115	4.53264	C8H16O2	FA (8:0) octanoic acid	Level 1	Lipids: Fatty Acyls	1.46449	1.02294	3.54199	not detected	0.566392	0.0394133	0.899488	NA
280.24	3.90957	C18H32O2	Linoleate	Level 1	Lipids: Fatty Acyls	1.04938	1.07042	1.17082	not detected	0.0264516	0.227599	0.177122	NA
282.256	3.89974	C18H34O2	[FA (18:1)] 9Z-octadecenoic acid	Level 1	Lipids: Fatty Acyls	1.09525	1.07091	1.17831	not detected	0.0905955	0.224261	0.110805	NA
228.209	3.99993	C14H28O2	Tetradecanoic acid	Level 1	Lipid Metabolism	1.2916	0.853945	7.19254	not detected	0.759877	0.226903	1.15145	NA
284.271	3.89982	C18H36O2	Octadecanoic acid	Level 1	Lipid Metabolism	0.928518	0.974086	2.83225	not detected	0.494874	0.0718153	0.837612	NA
488.107	15.2617	C14H26N4O11P2	CDP-choline	Level 1	Lipid Metabolism	1.10021	1.1951	1.20868	1.78311	0.188218	0.145057	0.0930891	0.20872
125.015	14.7195	C2H7NO3S	Taurine	Level 1	Lipid Metabolism	1.27045	0.92529	0.902282	1.24119	0.33769	0.255117	0.145892	0.0991495
183.066	14.8785	C5H14NO4P	Choline phosphate	Level 1	Lipid Metabolism	1.32671	0.920063	0.764905	2.03452	0.147429	0.0289696	0.246464	0.400213
172.014	14.7064	C3H9O6P	sn-Glycerol 3-phosphate	Level 1	Lipid Metabolism	1.24371	0.456857	0.624856	1.11249	0.231236	0.83456	0.110538	0.166482
427.029	15.065	C10H15N5O10P2	ADP	Level 1	Energy Metabolism	0.830483	0.964374	0.705311	not detected	0.113857	0.133913	0.0266238	NA
506.996	16.5384	C10H16N5O13P3	ATP	Level 1	Energy Metabolism	0.920281	0.999209	0.685393	1.12659	0.237394	0.490271	0.251939	0.294094
743.076	16.6914	C21H28N7O17P3	NADP+	Level 1	Energy Metabolism	1.10818	0.977319	0.603506	not detected	0.066514	0.399988	0.123984	NA
290.123	16.6995	C10H18N4O6	N-(L-Arginino)succinate	Level 2	Amino Acid Metabolism	1.89855	0.94237	12.058	2.77489	0.16434	0.214355	0.15904	0.165218
231.074	12.8798	C9H13NO6	N-Succinyl-L-glutamate 5-semialdehyde	Level 2	Amino Acid Metabolism	1.32859	1.21676	5.54347	not detected	0.0206329	0.0879874	0.159895	NA
229.059	13.9495	C9H11NO6	4-(L-Alanin-3-yl)-2-hydroxy-cis,cis-muconate 6-semialdehyde	Level 2	Amino Acid Metabolism	1.36161	1.26521	4.30727	4.577	0.156815	0.0714496	0.121645	0.0738948
247.069	13.9774	C9H13NO7	N-Succinyl-L-glutamate	Level 2	Amino Acid Metabolism	1.61264	1.31589	4.76447	not detected	0.265484	0.0746383	0.0917235	NA
188.127	22.0313	C7H16N4O2	Homoarginine	Level 2	Amino Acid Metabolism	2.47809	1.42665	6.47588	1.9902	0.0728833	0.346532	0.201921	0.111026
146.058	11.068	C6H10O4	(S)-2-Aceto-2-hydroxybutanoate	Level 2	Amino Acid Metabolism	1.70232	1.08316	4.09294	not detected	0.281887	0.211075	0.914033	NA
117.079	12.4653	C5H11NO2	L-Valine	Level 2	Amino Acid Metabolism	2.6434	1.36108	5.43576	0.88404	0.412071	0.20157	0.112186	0.0458365
190.095	22.3821	C7H14N2O4	meso-2,6-Diaminoheptanedioate	Level 2	Amino Acid Metabolism	1.45522	1.11703	2.96758	1.29997	0.112612	0.148342	0.258445	0.152018
104.011	15.4933	C3H4O4	Hydroxypyruvate	Level 2	Amino Acid Metabolism	1.0381	1.12711	2.00295	not detected	0.256122	0.0236614	0.583018	NA
304.139	16.4509	C11H20N4O6	D-Nopaline	Level 2	Amino Acid Metabolism	3.55917	1.65836	6.86614	not detected	0.0442049	0.067348	0.114758	NA
117.058	11.5203	C8H7N	Indole	Level 2	Amino Acid Metabolism	2.13121	0.973609	4.04107	0.979193	0.177477	0.318464	0.0812902	0.242465
216.111	11.5428	C9H16N2O4	gamma-Glutamyl-gamma-aminobutyraldehyde	Level 2	Amino Acid Metabolism	1.8617	1.35013	3.39943	0.921745	0.198777	0.104842	0.217022	0.00966026
246.133	17.0391	C9H18N4O4	N2-(D-1-Carboxyethyl)-L-arginine	Level 2	Amino Acid Metabolism	1.30589	1.29215	2.31322	2.5884	0.115658	0.0382286	0.0960304	0.283103
158.069	10.8008	C6H10N2O3	5-Hydroxyectoine	Level 2	Amino Acid Metabolism	3.01954	1.17579	5.3013	1.41996	0.213513	0.237508	0.146132	0.118864
338.052	14.3029	C10H15N2O9P	1-(5-Phosphoribosyl)imidazole-4-acetate	Level 2	Amino Acid Metabolism	0.910066	1.33581	1.52055	not detected	0.349617	0.146156	0.0857727	NA
190.059	16.4113	C6H10N2O5	N-Carbamyl-L-glutamate	Level 2	Amino Acid Metabolism	1.6955	1.24056	2.79326	1.34574	0.276715	0.152857	0.150851	0.0608668
132.054	13.552	C4H8N2O3	N-Carbamoylsarcosine	Level 2	Amino Acid Metabolism	3.14808	1.17045	5.0258	not detected	0.263768	0.233641	0.057432	NA
174.1	9.36559	C7H14N2O3	N-Acetylornithine	Level 2	Amino Acid Metabolism	1.14372	1.25194	1.82272	not detected	0.23104	0.157809	0.022591	NA
218.127	17.0058	C9H18N2O4	N2-(D-1-Carboxyethyl)-L-lysine	Level 2	Amino Acid Metabolism	1.7594	1.43995	2.80188	2.2594	0.185321	0.117353	0.185074	0.170582
188.153	21.2277	C9H20N2O2	N6,N6,N6-Trimethyl-L-lysine	Level 2	Amino Acid Metabolism	0.973122	1.25569	1.54751	1.54518	0.136146	0.347303	0.0517729	0.250298
232.106	13.5268	C9H16N2O5	N2-Succinyl-L-ornithine	Level 2	Amino Acid Metabolism	1.55349	1.44678	2.35622	0.744858	0.0398463	0.113856	0.123073	0.091987
250.062	14.0306	C8H14N2O5S	gamma-L-Glutamyl-L-cysteine	Level 2	Amino Acid Metabolism	1.14734	0.880191	1.71451	1.72945	0.262428	0.155829	0.392652	0.0304171
128.095	16.5425	C6H12N2O	L-Lysine 1,6-lactam	Level 2	Amino Acid Metabolism	1.90932	0.836784	2.60251	59.0129	0.0680351	0.261633	0.186517	1.53619
307.084	14.147	C10H17N3O6S	Glutathione	Level 2	Amino Acid Metabolism	1.43597	1.06687	1.94932	2.15165	0.250187	0.0312991	0.0633965	0.171173
160.121	21.8864	C7H16N2O2	N6-Methyl-L-lysine	Level 2	Amino Acid Metabolism	2.03833	1.4304	2.74884	not detected	0.0714903	0.200676	0.191885	NA
203.116	11.0181	C9H17NO4	O-Acetylcarnitine	Level 2	Amino Acid Metabolism	1.21018	1.17193	1.63087	2.60786	0.436808	0.0953201	0.209274	0.224434
131.095	12.5606	C6H13NO2	(3R)-beta-Leucine	Level 2	Amino Acid Metabolism	1.46566	1.01734	1.94742	not detected	0.205065	0.0831251	0.16041	NA
165.046	13.277	C5H11NO3S	L-Methionine S-oxide	Level 2	Amino Acid Metabolism	2.65282	1.10182	3.3783	not detected	0.533452	0.155912	0.212539	NA
189.064	14.0146	C7H11NO5	N-Acetyl-L-glutamate	Level 2	Amino Acid Metabolism	1.17026	0.858548	1.46955	4.49345	0.312994	0.0225798	0.186286	0.245889
612.152	17.3047	C20H32N6O12S2	Glutathione disulfide	Level 2	Amino Acid Metabolism	1.19601	1.03402	1.46997	2.95791	0.254537	0.12251	0.391023	0.174787
160.085	11.1049	C6H12N2O3	N-gamma-Acetyldiaminobutyrate	Level 2	Amino Acid Metabolism	2.28457	1.23097	2.77097	not detected	0.231801	0.140482	0.0447614	NA
301.056	14.9653	C8H16NO9P	N-Acetyl-D-glucosamine 6-phosphate	Level 2	Amino Acid Metabolism	34.6831	1.14931	41.9831	16.6114	0.0980457	0.135065	0.0790482	NA
142.074	14.3145	C6H10N2O2	Ectoine	Level 2	Amino Acid Metabolism	1.79816	1.3341	2.15558	not detected	0.1087	0.0883065	0.25846	NA
312.022	16.1234	C9H16N2O5Se	gamma-Glutamyl-Se-methylselenocysteine	Level 2	Amino Acid Metabolism	0.459861	0.876132	0.533545	1.22882	0.165874	0.0902351	0.17343	0.0657534
132.042	14.3671	C5H8O4	(S)-2-Acetolactate	Level 2	Amino Acid Metabolism	0.94552	0.914132	1.08662	5.93691	0.056087	0.139927	0.218533	0.638447
139.987	16.1248	C2H5O5P	Acetyl phosphate	Level 2	Amino Acid Metabolism	0.60457	1.02862	0.691374	1.19463	0.104817	0.212891	0.141973	0.185651
87.0684	10.6001	C4H9NO	4-Aminobutanal	Level 2	Amino Acid Metabolism	1.72079	1.33921	1.96185	not detected	0.0919948	0.225339	0.11103	NA
185.009	16.3234	C3H8NO6P	O-Phospho-L-serine	Level 2	Amino Acid Metabolism	1.80391	1.1902	2.03636	1.944	0.149664	0.161228	0.0831241	0.244369
217.106	12.3039	C8H15N3O4	N-Acetyl-L-citrulline	Level 2	Amino Acid Metabolism	3.47848	1.30589	3.70223	0.975178	0.0361845	0.0159523	0.120849	0.140258
114.032	14.7553	C5H6O3	2-Hydroxy-2,4-pentadienoate	Level 2	Amino Acid Metabolism	1.27163	1.08934	1.3449	not detected	0.121412	0.195798	0.510026	NA
274.128	12.9269	C10H18N4O5	N2-Succinyl-L-arginine	Level 2	Amino Acid Metabolism	7.29215	1.47509	7.57699	1.35182	0.265717	0.140918	0.219332	0.0964194
217.143	16.2575	C9H19N3O3	gamma-L-Glutamylputrescine	Level 2	Amino Acid Metabolism	5.50313	1.30514	5.64213	1.37226	0.201431	0.129386	0.0514417	0.195111
199.096	12.0275	C8H13N3O3	gamma-Glutamyl-beta-aminopropiononitrile	Level 2	Amino Acid Metabolism	2.33729	1.24511	2.35784	not detected	0.189712	0.180372	0.201153	NA
114.043	27.8559	C4H6N2O2	3-Cyano-L-alanine	Level 2	Amino Acid Metabolism	0.962704	1.07316	0.962297	not detected	0.0420108	0.0522042	0.0895655	NA
140.983	29.0525	CH4NO5P	Carbamoyl phosphate	Level 2	Amino Acid Metabolism	1.08337	1.10184	1.05374	not detected	0.0472381	0.172636	0.212397	NA
114.043	17.2163	C4H6N2O2	N-Methylhydantoin	Level 2	Amino Acid Metabolism	1.20236	1.03534	1.12595	not detected	0.135756	0.243436	0.209117	NA
204.111	9.6334	C8H16N2O4	N6-Acetyl-N6-hydroxy-L-lysine	Level 2	Amino Acid Metabolism	2.19307	1.25964	2.05369	2.18985	0.141489	0.110089	0.11313	0.17798
260.012	12.875	C6H13O7PS	S-Methyl-5-thio-D-ribose 1-phosphate	Level 2	Amino Acid Metabolism	1.29585	0.792951	1.20888	not detected	0.197483	0.474463	0.0780756	NA
203.079	14.8974	C8H13NO5	N2-Acetyl-L-aminoadipate	Level 2	Amino Acid Metabolism	7.36221	0.881842	6.85667	1.34909	0.107635	0.0609152	0.0137027	0.117033
111.08	12.7814	C5H9N3	1H-Imidazole-4-ethanamine	Level 2	Amino Acid Metabolism	1.33099	1.0546	1.21276	not detected	0.0329816	0.10862	0.0305583	NA
159.09	12.7524	C7H13NO3	5-Acetamidopentanoate	Level 2	Amino Acid Metabolism	1.19246	0.879919	1.06862	0.73484	0.352307	0.113683	0.31296	0.200457
127.063	7.18974	C6H9NO2	delta1-Piperideine-2-carboxylate	Level 2	Amino Acid Metabolism	3.17725	1.22463	2.79654	not detected	0.355051	0.296615	0.273631	NA
173.069	9.5497	C7H11NO4	N-Acetyl-L-glutamate 5-semialdehyde	Level 2	Amino Acid Metabolism	1.1054	1.00221	0.951404	0.7431	0.10599	0.112966	0.108726	0.0912893
283.046	15.0623	C8H14NO8P	N2-Acetyl-L-aminoadipyl-delta-phosphate	Level 2	Amino Acid Metabolism	1631.72	not detected	1389.61	not detected	0.0399833	NA	0.06121	NA
161.069	16.192	C6H11NO4	O-Acetyl-L-homoserine	Level 2	Amino Acid Metabolism	41.0586	0.928099	34.8478	1.04907	0.0848771	0.0529576	0.110466	0.325319
117.043	11.0335	C4H7NO3	L-Aspartate 4-semialdehyde	Level 2	Amino Acid Metabolism	1.68053	1.21915	1.41859	0.498076	0.235774	0.0545701	0.217502	0.12364
122.073	4.69678	C8H10O	Phenylethyl alcohol	Level 2	Amino Acid Metabolism	1.47695	1.07953	1.23032	not detected	0.157987	0.667076	0.569168	NA
130.111	18.3339	C6H14N2O	N-Acetylputrescine	Level 2	Amino Acid Metabolism	1.50065	1.1241	1.22934	not detected	0.271731	0.0841505	0.18851	NA
430.065	15.1962	C11H20N4O10P2	CMP-2-aminoethylphosphonate	Level 2	Amino Acid Metabolism	1.63778	1.026	1.25285	1.6506	0.12215	0.116988	0.165792	0.167345
131.058	8.9668	C5H9NO3	L-Glutamate 5-semialdehyde	Level 2	Amino Acid Metabolism	1.22905	1.16093	0.931335	not detected	0.301811	0.136905	0.177146	NA
102.032	14.4559	C4H6O3	2-Oxobutanoate	Level 2	Amino Acid Metabolism	1.21703	1.00924	0.917103	not detected	0.257541	0.197259	0.121312	NA
123.983	10.9642	C2H4O4S	Sulfoacetaldehyde	Level 2	Amino Acid Metabolism	1.59373	1.19893	1.16559	not detected	1.01644	1.28396	0.551908	NA
132.09	15.7812	C5H12N2O2	(2R,4S)-2,4-Diaminopentanoate	Level 2	Amino Acid Metabolism	1.55711	0.81187	1.05994	not detected	0.664905	0.887163	0.35061	NA
167.982	15.9022	C3H5O6P	3-Phosphonopyruvate	Level 2	Amino Acid Metabolism	0.867013	0.944179	0.56911	not detected	0.14684	0.198836	0.227411	NA
209.069	7.08691	C10H11NO4	4-Hydroxyphenylacetylglycine	Level 2	Amino Acid Metabolism	1.61908	1.32052	1.02568	not detected	0.335818	0.305699	0.20646	NA
148.037	15.0335	C5H8O5	(R)-2-Hydroxyglutarate	Level 2	Amino Acid Metabolism	1.11083	0.897421	0.679112	not detected	0.395256	0.127481	0.0983197	NA
123.992	14.9011	C2H5O4P	Phosphonoacetaldehyde	Level 2	Amino Acid Metabolism	1.35532	0.913577	0.823818	2.48477	0.181312	0.0937877	0.175752	0.46112
145.074	12.4473	C6H11NO3	[FA oxo,amino(6:0)] 3-oxo-5S-amino-hexanoic acid	Level 2	Amino Acid Metabolism	1.56158	1.12359	0.93025	27.986	0.436169	0.216025	0.0344115	0.908054
129.043	10.2208	C5H7NO3	5-Oxoproline	Level 2	Amino Acid Metabolism	1.56516	0.924216	0.910626	not detected	0.341912	0.0599206	0.185401	NA
125.999	10.7242	C2H6O4S	2-Hydroxyethanesulfonate	Level 2	Amino Acid Metabolism	1.59521	1.01231	0.906864	not detected	0.272749	0.254511	0.0318641	NA
126.008	13.1815	C2H7O4P	2-Hydroxyethylphosphonate	Level 2	Amino Acid Metabolism	1.41587	1.02932	0.79165	1.14563	0.236681	0.0612524	0.140517	0.423369
162.035	7.69827	C6H10O3S	1,2-Dihydroxy-5-(methylthio)pent-1-en-3-one	Level 2	Amino Acid Metabolism	20.2177	2.81814	11.1868	0.903776	0.545856	0.677103	0.263332	0.37259
172.048	15.2891	C6H8N2O4	Hydantoin-5-propionate	Level 2	Amino Acid Metabolism	0.764794	0.934341	0.418178	1.28488	0.321851	0.251443	0.163349	0.0918155
245.149	16.1663	C9H19N5O3	beta-Alanyl-L-arginine	Level 2	Amino Acid Metabolism	8.65233	1.18996	4.49031	1.20265	0.300886	0.218894	0.0716725	0.123943
113.048	9.58313	C5H7NO2	(S)-1-Pyrroline-5-carboxylate	Level 2	Amino Acid Metabolism	1.9698	0.899485	0.989914	0.47192	0.47595	0.404606	0.249419	0.288066
229.088	14.7203	C9H15N3O2S	Ergothioneine	Level 2	Amino Acid Metabolism	1.4717	0.903815	0.734679	1.44535	0.438041	0.160428	0.182757	0.0491681
197.116	13.6122	C9H15N3O2	Hercynine	Level 2	Amino Acid Metabolism	1.35355	1.10663	0.657565	1.12745	0.443965	0.365467	0.19246	0.275399
145.038	10.646	C5H7NO4	2-Oxoglutaramate	Level 2	Amino Acid Metabolism	0.951353	0.855173	0.133386	not detected	0.375509	0.124231	0.0796652	NA
190.084	13.0309	C8H14O5	(R)-3-((R)-3-Hydroxybutanoyloxy)butanoate	Level 2	Carbohydrate Metabolism	1.08413	1.02118	3.2677	0.104879	0.465528	0.124875	0.905091	0.240544
164.069	11.6489	C6H12O5	L-Rhamnose	Level 2	Carbohydrate Metabolism	1.88521	2.39662	4.4841	not detected	0.569425	0.977826	1.35752	NA
92.0472	10.2689	C3H8O3	Glycerol	Level 2	Carbohydrate Metabolism	1.13413	0.877391	2.28265	not detected	0.636308	0.912756	0.606864	NA
379.105	12.3563	C13H21N3O8S	(R)-S-Lactoylglutathione	Level 2	Carbohydrate Metabolism	1.59706	1.12866	3.05989	4.75956	0.017295	0.378485	0.104133	0.348893
88.0524	5.94032	C4H8O2	Butanoic acid	Level 2	Carbohydrate Metabolism	0.800616	1.41212	1.30764	not detected	0.301483	0.536105	0.565253	NA
150.053	14.1615	C5H10O5	L-Arabinose	Level 2	Carbohydrate Metabolism	0.691976	1.09921	1.11738	not detected	1.07657	0.603889	0.363455	NA
262.045	15.1163	C6H15O9P	D-Mannitol 1-phosphate	Level 2	Carbohydrate Metabolism	1.20638	1.14872	1.48562	1.39181	0.20435	0.271588	0.122607	0.123703
290.04	16.1148	C7H15O10P	D-Sedoheptulose 7-phosphate	Level 2	Carbohydrate Metabolism	0.667381	0.981	0.789358	1.44851	0.128621	0.12944	0.131762	0.295786
177.064	13.0785	C6H11NO5	4-Hydroxy-4-methylglutamate	Level 2	Carbohydrate Metabolism	1.59487	1.02589	1.77688	4.26396	0.342812	0.388708	0.280322	0.215113
150.053	11.9424	C5H10O5	D-Ribose	Level 2	Carbohydrate Metabolism	1.75498	0.980905	1.95115	not detected	0.452644	0.368683	0.557684	NA
120.042	10.7078	C4H8O4	D-Erythrose	Level 2	Carbohydrate Metabolism	1.35516	1.08866	1.39521	not detected	0.270059	0.104811	0.286447	NA
169.998	15.9854	C3H7O6P	D-Glyceraldehyde 3-phosphate	Level 2	Carbohydrate Metabolism	1.56757	0.963181	1.60574	1.48655	0.0298289	0.378907	0.158338	0.321183
565.07	15.9708	C15H25N3O16P2	CDP-glucose	Level 2	Carbohydrate Metabolism	32.3108	1.38929	31.6711	not detected	0.242216	0.113967	0.205804	NA
589.082	17.3938	C16H25N5O15P2	GDP-L-fucose	Level 2	Carbohydrate Metabolism	1.25643	1.19653	1.10089	1.19578	0.0561537	0.390893	0.246501	0.23913
580.035	18.8486	C15H22N2O18P2	UDP-glucuronate	Level 2	Carbohydrate Metabolism	0.954125	1.19735	0.78393	not detected	0.179241	0.596534	0.0383333	NA
174.016	17.8185	C6H6O6	cis-Aconitate	Level 2	Carbohydrate Metabolism	1.20265	0.808633	0.921848	not detected	0.123167	0.20931	0.3046	NA
180.063	14.5885	C6H12O6	D-Glucose	Level 2	Carbohydrate Metabolism	0.758947	0.632871	0.576909	not detected	0.303169	0.103232	0.866925	NA
179.079	15.9091	C6H13NO5	D-Galactosamine	Level 2	Carbohydrate Metabolism	1.15575	0.844737	0.874535	36.0897	0.43163	0.0319606	0.338001	1.01792
166.048	13.3696	C5H10O6	D-Xylonate	Level 2	Carbohydrate Metabolism	1.41978	0.971688	1.01368	not detected	0.206071	0.176854	0.162156	NA
260.03	15.8175	C6H13O9P	D-Mannose 6-phosphate	Level 2	Carbohydrate Metabolism	1.12967	0.961497	0.780376	0.978857	0.283417	0.100802	0.0399916	0.392295
260.029	14.6095	C6H13O9P	D-Fructose 6-phosphate	Level 2	Carbohydrate Metabolism	1.09521	1.0498	0.754846	not detected	0.318173	0.228578	0.0652483	NA
180.063	12.9132	C6H12O6	D-Galactose	Level 2	Carbohydrate Metabolism	1.335	0.811945	0.877242	not detected	0.442844	0.25824	0.150983	NA
254.1	13.6821	C9H18O8	3-beta-D-Galactosyl-sn-glycerol	Level 2	Carbohydrate Metabolism	1.05382	0.851948	0.673272	not detected	0.428801	0.107269	0.196081	NA
194.043	14.342	C6H10O7	D-Glucuronate	Level 2	Carbohydrate Metabolism	5.92184	0.936856	3.78116	not detected	0.40656	0.316362	0.19277	NA
136.037	12.3617	C4H8O5	[FA trihydroxy(4:0)] 2,3,4-trihydroxy-butanoic acid	Level 2	Carbohydrate Metabolism	1.72305	1.00971	1.08004	not detected	0.316718	0.22642	0.0974498	NA
230.019	14.9406	C5H11O8P	D-Ribulose 5-phosphate	Level 2	Carbohydrate Metabolism	1.51006	1.10122	0.945782	not detected	0.0615627	0.263355	0.0716439	NA
178.048	13.3979	C6H10O6	2-Dehydro-3-deoxy-D-galactonate	Level 2	Carbohydrate Metabolism	1.14338	1.00131	0.694753	not detected	0.3783	0.0473243	0.0835115	NA
767.115	13.6239	C21H36N7O16P3S	CoA	Level 2	Carbohydrate Metabolism	2.08084	1.2645	1.25465	1.14257	0.445354	1.02097	0.128346	0.427045
166.048	12.918	C5H10O6	D-Arabinonate	Level 2	Carbohydrate Metabolism	1.67903	0.956769	1.00585	not detected	0.400051	0.10724	0.118882	NA
118.027	15.0546	C4H6O4	Succinate	Level 2	Carbohydrate Metabolism	2.83122	0.972763	1.67594	not detected	0.329849	0.0772837	0.227406	NA
196.058	13.4046	C6H12O7	D-Mannonate	Level 2	Carbohydrate Metabolism	1.32736	0.917385	0.705993	not detected	0.471364	0.16038	0.163866	NA
178.048	11.9735	C6H10O6	L-Galactono-1,4-lactone	Level 2	Carbohydrate Metabolism	1.80233	0.988521	0.950904	2.04715	0.420316	0.163273	0.270301	0.157975
536.159	3.8275	C18H32O18	1-4-beta-D-Glucan	Level 2	Carbohydrate Metabolism	1.27168	0.625009	0.589787	not detected	0.263602	0.0475302	0.419046	NA
162.053	12.7356	C6H10O5	3-Ethylmalate	Level 2	Carbohydrate Metabolism	1.77124	0.922022	0.820694	1.67394	0.354694	0.0788423	0.118823	0.205421
341.132	15.6731	C12H23NO10	Lactosamine	Level 2	Carbohydrate Metabolism	913.594	not detected	422.598	not detected	0.340841	NA	0.150259	NA
146.022	15.3942	C5H6O5	2-Oxoglutarate	Level 2	Carbohydrate Metabolism	2.07011	1.26951	0.923607	not detected	0.300846	0.17815	0.118513	NA
179.079	14.3496	C6H13NO5	D-Glucosamine	Level 2	Carbohydrate Metabolism	1859.26	not detected	782.212	24.4321	0.13849	NA	0.113862	0.869221
259.046	16.3005	C6H14NO8P	alpha-D-Glucosamine 1-phosphate	Level 2	Carbohydrate Metabolism	753.421	0.35461	283.333	not detected	0.063629	0.470211	0.0133036	NA
265.959	22.9377	C3H8O10P2	3-Phospho-D-glyceroyl phosphate	Level 2	Carbohydrate Metabolism	0.703692	0.859043	0.260414	0.276113	0.469322	0.704125	0.114786	1.36866
265.959	22.599	C3H8O10P2	2,3-Bisphospho-D-glycerate	Level 2	Carbohydrate Metabolism	0.910652	1.11578	0.330238	0.276113	0.453116	0.891648	0.288671	1.36866
254.09	22.469	C11H14N2O5	nicotinamide riboside	Level 2	Nucleotide Metabolism	1.32069	1.56666	4.2808	not detected	0.119301	0.129373	0.150026	NA
285.036	15.6183	C6H12N3O8P	2-(Formamido)-N1-(5-phospho-D-ribosyl)acetamidine	Level 2	Nucleotide Metabolism	1.25594	1.07084	1.94494	not detected	0.676981	0.880849	0.310167	NA
463.074	18.1824	C14H18N5O11P	N6-(1,2-Dicarboxyethyl)-AMP	Level 2	Nucleotide Metabolism	1.37472	1.16867	1.64212	1.2969	0.115446	0.702926	0.0662981	0.783853
152.033	11.3986	C5H4N4O2	Xanthine	Level 2	Nucleotide Metabolism	1.39803	0.841544	1.57577	not detected	0.439468	0.331804	0.254681	NA
482.984	18.6741	C9H16N3O14P3	CTP	Level 2	Nucleotide Metabolism	0.898616	1.09689	0.928546	1.60613	0.291167	0.826799	0.318388	0.613239
244.069	17.3141	C9H12N2O6	Pseudouridine	Level 2	Nucleotide Metabolism	1.73529	0.963046	1.69712	not detected	0.135754	0.174076	0.240377	NA
402.023	14.5123	C10H16N2O11P2	dTDP	Level 2	Nucleotide Metabolism	3.16578	1.30184	2.05813	not detected	0.0658346	0.256615	0.106432	NA
522.991	20.3555	C10H16N5O14P3	GTP	Level 2	Nucleotide Metabolism	1.64795	1.04241	1.05593	1.09147	0.430279	0.273602	0.189764	0.835843
128.059	14.6778	C5H8N2O2	5,6-Dihydrothymine	Level 2	Nucleotide Metabolism	1.16159	0.756008	0.685947	not detected	0.354609	0.0906588	0.166617	NA
331.068	12.8092	C10H14N5O6P	dAMP	Level 2	Nucleotide Metabolism	2.53516	1.07234	1.43467	1.22547	0.122675	0.242065	0.232465	0.296868
176.043	16.556	C5H8N2O5	N-Carbamoyl-L-aspartate	Level 2	Nucleotide Metabolism	1.24471	0.954289	0.358817	2.32102	0.283505	0.14841	0.0783633	0.143855
217.059	14.4709	C8H11NO6	2-(Hydroxymethyl)-3-(acetamidomethylene)succinate	Level 2	Metabolism of Cofactors and Vitamins	1.96359	not detected	21.5389	not detected	NA	NA	0.278778	NA
278.127	10.0761	C14H18N2O4	alpha-Ribazole	Level 2	Metabolism of Cofactors and Vitamins	3.40721	1.42994	6.58209	0.876136	0.162022	0.35805	0.207768	0.461692
214.132	8.91214	C10H18N2O3	Dethiobiotin	Level 2	Metabolism of Cofactors and Vitamins	0.824276	1.27015	1.3814	0.469676	0.0838384	0.142503	0.190701	0.266265
376.138	8.6408	C17H20N4O6	Riboflavin	Level 2	Metabolism of Cofactors and Vitamins	1.99504	0.983436	3.22436	1.53819	0.202296	0.175348	0.239623	0.0998946
180.054	14.2075	C8H8N2O3	Nicotinurate	Level 2	Metabolism of Cofactors and Vitamins	1.50423	1.23005	2.07559	not detected	0.282313	0.195827	0.134307	NA
286.23	3.79574	C20H30O	Retinol	Level 2	Metabolism of Cofactors and Vitamins	1.27007	0.923225	1.60898	not detected	0.0976939	0.0619913	0.191826	NA
239.102	10.5302	C9H13N5O3	Dihydrobiopterin	Level 2	Metabolism of Cofactors and Vitamins	1.58103	1.04841	1.93417	not detected	0.198368	0.062651	0.0136486	NA
255.074	13.0448	C11H13NO6	Nicotinate D-ribonucleoside	Level 2	Metabolism of Cofactors and Vitamins	1.28236	1.09651	1.52861	1.52574	0.196369	0.357466	0.116061	0.300017
326.123	13.0026	C13H18N4O6	6,7-Dimethyl-8-(1-D-ribityl)lumazine	Level 2	Metabolism of Cofactors and Vitamins	1.68229	1.15421	1.94416	1.88647	0.310425	0.125543	0.237278	0.427173
246.104	8.7234	C10H18N2O3S	9-mercaptodethiobiotin	Level 2	Metabolism of Cofactors and Vitamins	6.85864	1.45443	7.57383	0.963756	0.233038	0.386226	0.0916622	0.285618
248.056	15.2742	C8H13N2O5P	Pyridoxamine phosphate	Level 2	Metabolism of Cofactors and Vitamins	1.30394	1.17133	1.28027	1.40926	0.119895	0.0776217	0.102808	0.120775
137.048	11.7607	C7H7NO2	N-Methylnicotinate	Level 2	Metabolism of Cofactors and Vitamins	2.39861	0.768703	2.05424	1.17928	0.411636	0.35492	0.238998	0.323612
144.042	13.3488	C6H8O4	2,3-Dimethylmaleate	Level 2	Metabolism of Cofactors and Vitamins	1.47738	0.93404	1.23523	1.0915	0.24812	0.113307	0.294364	0.25125
187.121	11.8103	C9H17NO3	8-Amino-7-oxononanoate	Level 2	Metabolism of Cofactors and Vitamins	1.28836	1.01913	0.846895	0.796207	0.378232	0.222972	0.122875	0.518234
334.057	15.1793	C11H15N2O8P	Nicotinamide D-ribonucleotide	Level 2	Metabolism of Cofactors and Vitamins	1.42062	0.994903	0.842299	1.41151	0.126949	0.17997	0.176957	0.160037
264.105	20.548	C12H16N4OS	Thiamin	Level 2	Metabolism of Cofactors and Vitamins	0.966422	0.684431	0.223063	0.305417	0.556112	0.0816436	0.0689166	0.110063
127.027	10.5453	C5H5NO3	2,3,6-Trihydroxypyridine	Level 2	Metabolism of Cofactors and Vitamins	1.03639	0.981452	0.143218	not detected	0.416086	0.102459	0.385908	NA
441.14	16.588	C19H19N7O6	Folate	Level 2	Metabolism of Cofactors and Vitamins	2.01635	0.689573	0.22549	0.461873	0.0956794	0.30596	0.133836	0.217776
466.312	3.67579	C27H46O4S	Cholesterolsulfate	Level 2	Lipids: Sterol lipids	1.183	0.954572	1.13704	not detected	0.240713	0.13278	0.0906413	NA
612.265	3.80816	C27H48O11S2	5beta-cholestan-3alpha,4alpha,11beta,12beta,21-pentol-3,21-disulphate	Level 2	Lipids: Sterol Lipids	1.31357	1.01291	1.1042	not detected	0.182559	0.220586	0.366395	NA
837.609	27.4517	C44H88NO11P	N-(octadecanoyl)-eicosasphinganine-1-phospho-(1'-myo-inositol)	Level 2	Lipids: Sphingolipids	1.29438	1.05929	1.16939	not detected	0.0848177	0.217826	0.052154	NA
301.298	7.11161	C18H39NO2	Sphinganine	Level 2	Lipids: Sphingolipids	1.75017	1.10716	2.29951	0.950479	0.11456	0.151729	0.193589	0.86612
299.282	4.35935	C18H37NO2	[SP] Sphing-4-enine	Level 2	Lipids: Sphingolipids	0.673911	0.97985	0.845075	0.911459	0.0761994	0.207685	0.114463	0.285757
537.512	3.93168	C34H67NO3	[SP (16:0)] N-(hexadecanoyl)-sphing-4-enine	Level 2	Lipids: Sphingolipids	1.04567	1.07743	1.23583	1.12075	0.110085	0.226444	0.389895	0.239487
647.622	3.87814	C42H81NO3	[SP (24:0)] N-(15Z-tetracosenoyl)-sphing-4-enine	Level 2	Lipids: Sphingolipids	0.947348	1.09115	1.07534	1.01681	0.16307	0.139308	0.101314	0.339014
758.63	4.82458	C43H87N2O6P	SM(d38:1)	Level 2	Lipids: Sphingolipids	1.3278	1.00926	1.43478	not detected	0.37471	0.276746	0.291641	NA
700.553	4.33606	C39H77N2O6P	SM(d34:2)	Level 2	Lipids: Sphingolipids	1.03287	1.1364	1.04846	not detected	0.227731	0.205085	0.110235	NA
840.709	4.9577	C49H97N2O6P	[SP (26:0)] N-(17Z-hexacosenoyl)-sphing-4-enine-1-phosphocholine	Level 2	Lipids: Sphingolipids	0.999866	0.938379	1.00166	1.2416	0.217209	0.128978	0.0942684	0.252093
814.692	4.60094	C47H95N2O6P	SM(d18:0/24:1(15Z))	Level 2	Lipids: Sphingolipids	1.10276	1.07916	1.08227	1.32344	0.126018	0.0871438	0.0400885	0.225548
800.677	4.49171	C46H93N2O6P	SM(d41:1)	Level 2	Lipids: Sphingolipids	1.08337	0.880416	1.04446	1.03501	0.101639	0.211139	0.171111	0.169933
812.677	4.49343	C47H93N2O6P	SM(d18:1/24:1(15Z))	Level 2	Lipids: Sphingolipids	1.26578	1.1608	1.21596	1.2987	0.0777995	0.135037	0.0797112	0.117714
702.568	4.36981	C39H79N2O6P	SM(d34:1)	Level 2	Lipids: Sphingolipids	0.92288	1.0154	0.859285	1.2284	0.162443	0.239244	0.072156	0.0590633
688.552	4.49622	C38H77N2O6P	SM(d33:1)	Level 2	Lipids: Sphingolipids	0.912866	0.99439	0.84206	not detected	0.156816	0.143505	0.128862	NA
730.599	4.42348	C41H83N2O6P	SM(d36:1)	Level 2	Lipids: Sphingolipids	0.991732	1.09023	0.890494	1.19935	0.115191	0.219267	0.149479	0.0573099
287.282	4.53275	C17H37NO2	[SP (17:0)] heptadecasphinganine	Level 2	Lipids: Sphingolipids	0.997714	1.51439	0.878611	0.774401	0.333462	0.298553	0.31141	0.50658
674.537	4.39275	C37H75N2O6P	SM(d32:1)	Level 2	Lipids: Sphingolipids	0.93929	0.994865	0.806888	not detected	0.343859	0.276252	0.032239	NA
798.662	4.40062	C46H91N2O6P	SM(d17:1/24:1(15Z))	Level 2	Lipids: Sphingolipids	1.30974	1.02147	1.11162	not detected	0.194977	0.14794	0.0256351	NA
728.585	4.31709	C41H81N2O6P	SM(d36:2)	Level 2	Lipids: Sphingolipids	1.0791	1.14005	0.859183	not detected	0.0389243	0.110899	0.124652	NA
716.583	4.35987	C40H81N2O6P	SM(d35:1)	Level 2	Lipids: Sphingolipids	1.03488	0.96121	0.811172	1.39091	0.0838063	0.241458	0.36606	0.335762
810.662	4.78507	C47H91N2O6P	SM(d18:2/24:1)	Level 2	Lipids: Sphingolipids	0.956154	0.815295	0.682336	not detected	0.143067	0.29479	0.128513	NA
381.264	5.10541	C18H40NO5P	[SP] Sphinganine-1-phosphate	Level 2	Lipids: Sphingolipids	1.84649	0.884106	0.66901	1.09082	0.179964	0.0962928	0.0914904	0.296956
379.249	5.10853	C18H38NO5P	[SP] Sphing-4-enine-1-phosphate	Level 2	Lipids: Sphingolipids	1.40598	0.673364	0.115559	not detected	0.059182	0.271311	NA	NA
778.602	20.7404	C50H83O4P	3,7,11,15,19,23,27,31,35,39-decamethyltetraconta-2E,6E,10E,14E,18E,22E,26E,30E,34E,38-decaen-1-yl phosphate	Level 2	Lipids: Prenols	0.79829	1.07274	0.917984	0.863837	0.0639743	0.2416	0.174825	0.163326
302.225	3.93317	C20H30O2	[PR] Abietic acid	Level 2	Lipids: Prenols	0.880898	1.18826	1.37825	not detected	0.159535	0.207637	0.262316	NA
458.194	4.18501	C25H30O8	Eruberin A	Level 2	Lipids: Polyketides	0.892673	0.63365	0.964059	not detected	1.05219	0.875466	0.162062	NA
356.053	5.95136	C18H12O8	2-Hydroxy-1,3-dimethoxy-8,9-methylenedioxycoumestan	Level 2	Lipids: Polyketides	1.21621	0.989605	1.05654	not detected	0.182815	0.0779552	0.246552	NA
467.302	5.00716	C22H46NO7P	[LysoPC(14:0)] 1-tetradecanoyl-sn-glycero-3-phosphocholine	Level 2	Lipids: Glycerophospholipids	0.831359	2.47438	7.68461	not detected	NA	0.892256	0.285733	NA
703.515	4.1018	C38H74NO8P	PC(30:1)	Level 2	Lipids: Glycerophospholipids	1.32241	1.30491	4.49404	not detected	0.156312	0.20082	0.140967	NA
545.276	4.27079	C26H44NO9P	[PS(20:4)] 1-(5Z,8Z,11Z,14Z-eicosatetraenoyl)-sn-glycero-3-phosphoserine	Level 2	Lipids: Glycerophospholipids	1.93399	1.79328	5.95216	not detected	0.350401	0.25132	0.283321	NA
689.5	3.98556	C37H72NO8P	PE(32:1)	Level 2	Lipids: Glycerophospholipids	0.87146	0.958816	2.07833	1.69662	0.0442784	0.100046	0.10453	0.0287574
687.484	4.10381	C37H70NO8P	PE(32:2)	Level 2	Lipids: Glycerophospholipids	0.815631	1.05433	1.89601	not detected	0.339413	0.223397	0.407301	NA
572.296	4.45571	C25H49O12P	[PI(16:0)] 1-hexadecanoyl-sn-glycero-3-phospho-(1'-myo-inositol)	Level 2	Lipids: Glycerophospholipids	1.55673	1.25754	3.4963	not detected	0.168635	0.0231558	0.0427162	NA
620.296	4.32339	C29H49O12P	[PI(20:4)] 1-(5Z,8Z,11Z,14Z-eicosatetraenoyl)-sn-glycero-3-phospho-(1'-myo-inositol)	Level 2	Lipids: Glycerophospholipids	0.835854	1.2605	1.84612	not detected	0.0964586	0.132993	0.0980434	NA
720.494	3.6464	C38H73O10P	PG(32:1)	Level 2	Lipids: Glycerophospholipids	1.26248	1.18207	2.63811	not detected	0.074857	0.0695257	0.124424	NA
705.53	4.09054	C38H76NO8P	PC(30:0)	Level 2	Lipids: Glycerophospholipids	0.939213	0.992733	1.89083	not detected	0.157345	0.215783	0.0314473	NA
600.327	7.03755	C27H53O12P	[PI(18:0)] 1-octadecanoyl-sn-glycero-3-phospho-(1'-myo-inositol)	Level 2	Lipids: Glycerophospholipids	1.08489	1.02922	2.09057	1.43483	0.166272	0.0982251	0.180658	0.302748
497.276	4.41352	C22H44NO9P	[PS(16:0)] 1-hexadecanoyl-sn-glycero-3-phosphoserine	Level 2	Lipids: Glycerophospholipids	0.860095	0.668736	1.47536	not detected	0.174527	0.190612	0.202138	NA
731.546	4.03209	C40H78NO8P	PC(32:1)	Level 2	Lipids: Glycerophospholipids	1.19038	1.07348	1.98528	not detected	0.0638322	0.163211	0.15457	NA
858.526	3.7398	C45H79O13P	PI(36:4)	Level 2	Lipids: Glycerophospholipids	1.11475	1.13335	1.83682	not detected	0.0973592	0.143531	0.110525	NA
598.312	7.01857	C27H51O12P	[PI(18:1)] 1-(9Z-octadecenoyl)-sn-glycero-3-phospho-(1'-myo-inositol)	Level 2	Lipids: Glycerophospholipids	1.01273	0.971427	1.61209	not detected	0.0183655	0.214257	0.235127	NA
691.516	4.44579	C37H74NO8P	PC(29:0)	Level 2	Lipids: Glycerophospholipids	0.865955	1.33557	1.33216	1.57619	0.290526	0.204727	0.229659	0.0940671
484.28	3.9489	C22H45O9P	[PG (16:0)] 1-hexadecanoyl-sn-glycero-3-phospho-(1'-sn-glycerol)	Level 2	Lipids: Glycerophospholipids	1.30994	1.04313	1.9524	not detected	0.0132883	0.193602	0.144799	NA
781.489	3.74573	C42H72NO10P	PS(36:5)	Level 2	Lipids: Glycerophospholipids	0.929693	0.839044	1.37334	not detected	0.205849	0.110653	0.250088	NA
596.296	4.38642	C27H49O12P	PI(18:2)	Level 2	Lipids: Glycerophospholipids	0.706819	1.04752	1.04148	not detected	0.252406	0.122234	0.107231	NA
501.286	4.63443	C25H44NO7P	LysoPE(20:4)	Level 2	Lipids: Glycerophospholipids	0.739143	1.05396	1.03338	not detected	0.338637	0.0871328	0.246491	NA
713.5	3.9425	C39H72NO8P	PE(34:3)	Level 2	Lipids: Glycerophospholipids	1.08228	1.0764	1.50909	not detected	0.092746	0.0755709	0.0382177	NA
884.542	3.73339	C47H81O13P	PI(38:5)	Level 2	Lipids: Glycerophospholipids	1.21183	1.04761	1.68442	not detected	0.142371	0.186813	0.0828431	NA
662.524	5.56932	C37H75O7P	PA(O-34:0)	Level 2	Lipids: Glycerophospholipids	0.698671	1.13285	0.942559	not detected	0.871635	0.708577	0.0810058	NA
717.531	4.93306	C39H76NO8P	PC(31:1)	Level 2	Lipids: Glycerophospholipids	0.967716	0.872516	1.29836	not detected	0.525114	0.395493	0.0509554	NA
737.499	3.91349	C41H72NO8P	PE(36:5)	Level 2	Lipids: Glycerophospholipids	0.987378	1.0403	1.28837	1.03124	0.0808624	0.0862305	0.056974	0.110973
794.51	3.62389	C44H75O10P	PG(38:6)	Level 2	Lipids: Glycerophospholipids	1.43891	1.27982	1.8745	1.1404	0.168361	0.156738	0.0998644	0.133461
717.53	3.94182	C39H76NO8P	PE(34:1)	Level 2	Lipids: Glycerophospholipids	0.921152	0.982276	1.1721	1.78441	0.12179	0.0961386	0.0817001	0.124267
734.51	3.64847	C39H75O10P	PG(33:1)	Level 2	Lipids: Glycerophospholipids	1.42495	1.0682	1.7893	not detected	0.175495	0.206367	0.212672	NA
739.515	3.92464	C41H74NO8P	PE(36:4)	Level 2	Lipids: Glycerophospholipids	0.994174	1.08911	1.2456	1.04394	0.0816745	0.0977978	0.0870699	0.0630108
655.422	5.06955	C35H62NO8P	PE(12:0/18:4(6Z,9Z,12Z,15Z))	Level 2	Lipids: Glycerophospholipids	0.730036	0.890069	0.908642	not detected	0.20259	0.0905949	0.0102554	NA
755.546	4.02748	C42H78NO8P	PC(34:3)	Level 2	Lipids: Glycerophospholipids	1.35292	1.11173	1.66896	1.19576	0.14915	0.176176	0.106272	0.0639563
834.526	3.76035	C43H79O13P	PI(34:2)	Level 2	Lipids: Glycerophospholipids	1.26128	0.934385	1.55483	not detected	0.18207	0.136024	0.214599	NA
674.488	3.89953	C37H71O8P	PA(34:1)	Level 2	Lipids: Glycerophospholipids	1.37322	0.941387	1.68299	not detected	0.0420633	0.110171	0.105744	NA
783.505	3.732	C42H74NO10P	PS(36:4)	Level 2	Lipids: Glycerophospholipids	1.0203	0.830531	1.24442	1.49256	0.117913	0.129474	0.102231	0.0756176
715.515	3.94137	C39H74NO8P	PE(34:2)	Level 2	Lipids: Glycerophospholipids	1.00411	1.01814	1.22343	1.13141	0.0719589	0.13843	0.0831761	0.0761798
759.506	3.77161	C40H74NO10P	PS(34:2)	Level 2	Lipids: Glycerophospholipids	0.89006	0.918604	1.07994	1.87676	0.0596688	0.161883	0.0207956	0.0561482
768.494	3.63291	C42H73O10P	PG(36:5)	Level 2	Lipids: Glycerophospholipids	1.58649	1.22143	1.88716	1.32285	0.117919	0.0755306	0.118557	0.0612018
886.557	3.7225	C47H83O13P	PI(38:4)	Level 2	Lipids: Glycerophospholipids	1.28386	1.05802	1.51334	not detected	0.0531213	0.0669496	0.128499	NA
761.521	3.7408	C40H76NO10P	PS(34:1)	Level 2	Lipids: Glycerophospholipids	1.05861	0.922839	1.23728	1.74434	0.116029	0.112099	0.105027	0.0197136
860.542	3.75771	C45H81O13P	PI(36:3)	Level 2	Lipids: Glycerophospholipids	1.52001	1.27934	1.76889	not detected	0.095381	0.0665019	0.166922	NA
512.311	3.91013	C24H49O9P	[PG (18:0)] 1-octadecanoyl-sn-glycero-3-phospho-(1'-sn-glycerol)	Level 2	Lipids: Glycerophospholipids	0.978579	1.03888	1.12069	0.980526	0.136957	0.155504	0.105289	0.144853
779.583	4.10195	C45H82NO7P	PE(P-40:4)	Level 2	Lipids: Glycerophospholipids	0.78301	0.990587	0.890054	not detected	0.258448	0.184099	0.108357	NA
510.296	3.92433	C24H47O9P	[PG (18:1)] 1-(9E-octadecenoyl)-sn-glycero-3-phospho-(1'-sn-glycerol)	Level 2	Lipids: Glycerophospholipids	1.28842	1.01748	1.46441	not detected	0.174595	0.226703	0.203731	NA
807.505	3.7345	C44H74NO10P	PS(38:6)	Level 2	Lipids: Glycerophospholipids	0.842502	0.898431	0.956566	1.71911	0.0146411	0.162102	0.043858	0.0618187
672.473	3.90568	C37H69O8P	PA(34:2)	Level 2	Lipids: Glycerophospholipids	1.44868	1.00539	1.62736	not detected	0.0575762	0.169071	0.135934	NA
733.561	4.03615	C40H80NO8P	PC(32:0)	Level 2	Lipids: Glycerophospholipids	1.01333	1.00061	1.13414	not detected	0.0346327	0.151219	0.0920305	NA
777.567	3.87164	C45H80NO7P	PE(P-40:5)	Level 2	Lipids: Glycerophospholipids	1.049	1.17796	1.16641	1.06778	0.112647	0.0371144	0.0741026	0.113546
669.437	7.08767	C36H64NO8P	PE(31:4)	Level 2	Lipids: Glycerophospholipids	1.2247	1.08684	1.35592	not detected	0.248553	0.154278	0.163718	NA
773.593	4.01294	C43H84NO8P	PE(38:1)	Level 2	Lipids: Glycerophospholipids	1.03628	0.940269	1.14318	1.32454	0.192987	0.178569	0.0349515	0.199751
523.291	4.30106	C24H46NO9P	[PS(18:1)] 1-(9Z-octadecenoyl)-sn-glycero-3-phosphoserine	Level 2	Lipids: Glycerophospholipids	1.52788	1.19756	1.6665	not detected	0.243153	0.164318	0.0383744	NA
691.515	3.89935	C37H74NO8P	PE(32:0)	Level 2	Lipids: Glycerophospholipids	1.06859	1.13933	1.14674	1.43342	0.113416	0.16898	0.262945	0.228108
655.422	7.08499	C35H62NO8P	PE(30:4)	Level 2	Lipids: Glycerophospholipids	1.37414	1.15981	1.47078	1.83183	0.195404	0.123042	0.23648	0.126181
509.348	4.72121	C25H52NO7P	LysoPE(20:0)	Level 2	Lipids: Glycerophospholipids	0.800299	0.946299	0.853794	not detected	0.117591	0.143964	0.104457	NA
763.516	3.90455	C43H74NO8P	PE(38:6)	Level 2	Lipids: Glycerophospholipids	1.07004	1.09385	1.14124	not detected	0.0251513	0.140738	0.0874491	NA
669.437	5.07353	C36H64NO8P	PE(13:0/18:4(6Z,9Z,12Z,15Z))	Level 2	Lipids: Glycerophospholipids	0.788342	0.942505	0.839021	not detected	0.142309	0.0569127	0.0502163	NA
479.302	7.03497	C23H48NO6P	[PC(15:1)] 1-(1Z-pentadecenyl)-sn-glycero-3-phosphocholine	Level 2	Lipids: Glycerophospholipids	0.942651	0.848929	1.00111	not detected	0.298631	0.231416	0.296349	NA
765.53	3.89257	C43H76NO8P	PE(38:5)	Level 2	Lipids: Glycerophospholipids	0.938089	0.878812	0.984026	not detected	0.0750302	0.164011	0.138925	NA
674.489	6.50118	C37H71O8P	[PA(16:0/18:1)] 1-hexadecanoyl-2-(11Z-octadecenoyl)-sn-glycero-3-phosphate	Level 2	Lipids: Glycerophospholipids	1.46849	0.952454	1.51318	not detected	0.136165	0.0370294	0.0991845	NA
785.52	3.73424	C42H76NO10P	PS(36:3)	Level 2	Lipids: Glycerophospholipids	1.07434	0.835617	1.10287	1.4197	0.116741	0.0862481	0.16967	0.0302404
811.536	3.7087	C44H78NO10P	PS(38:4)	Level 2	Lipids: Glycerophospholipids	1.09426	0.99234	1.11931	1.26076	0.0472662	0.0542494	0.155461	0.0271649
749.535	3.90663	C43H76NO7P	PE(P-38:5)	Level 2	Lipids: Glycerophospholipids	0.957906	1.11997	0.976896	not detected	0.0920963	0.165034	0.101017	NA
912.573	3.70895	C49H85O13P	PI(40:5)	Level 2	Lipids: Glycerophospholipids	1.2982	1.05258	1.31616	not detected	0.15445	0.232247	0.100542	NA
837.551	3.68844	C46H80NO10P	PS(40:5)	Level 2	Lipids: Glycerophospholipids	1.0158	1.06459	1.02424	1.3151	0.0671925	0.0831633	0.116784	0.0729302
820.527	3.62623	C46H77O10P	PG(40:7)	Level 2	Lipids: Glycerophospholipids	1.26161	0.93023	1.26526	not detected	0.133151	0.0589781	0.200714	NA
809.521	3.71262	C44H76NO10P	PS(38:5)	Level 2	Lipids: Glycerophospholipids	1.12434	0.844522	1.12321	1.47669	0.0739795	0.0872094	0.109253	0.0484467
746.51	3.63773	C40H75O10P	PG(34:2)	Level 2	Lipids: Glycerophospholipids	1.70487	1.02512	1.70125	not detected	0.0750032	0.0297282	0.12801	NA
521.348	4.7042	C26H52NO7P	LysoPC(18:1)	Level 2	Lipids: Glycerophospholipids	0.882955	0.954849	0.873636	32.4299	0.0566986	0.152339	0.0521637	NA
696.473	3.71568	C39H69O8P	PA(36:4)	Level 2	Lipids: Glycerophospholipids	1.32235	0.980803	1.29176	not detected	0.032698	0.0685997	0.121859	NA
525.307	4.29495	C24H48NO9P	PS(18:0)	Level 2	Lipids: Glycerophospholipids	1.06399	1.14342	1.03664	not detected	0.141292	0.164525	0.0731896	NA
525.308	7.02493	C24H48NO9P	[PS(18:0)] 1-octadecanoyl-sn-glycero-3-phosphoserine	Level 2	Lipids: Glycerophospholipids	1.13494	0.974669	1.09688	not detected	0.0906301	0.142849	0.232932	NA
723.52	3.9108	C41H74NO7P	PE(P-36:4)	Level 2	Lipids: Glycerophospholipids	0.963389	0.980563	0.915338	not detected	0.0567309	0.146441	0.176056	NA
791.547	3.93137	C45H78NO8P	PE(40:6)	Level 2	Lipids: Glycerophospholipids	0.907595	0.835092	0.85841	not detected	0.136694	0.236817	0.298723	NA
495.332	7.05834	C24H50NO7P	PE(19:0)	Level 2	Lipids: Glycerophospholipids	0.983107	0.924946	0.926376	not detected	0.230619	0.12077	0.142543	NA
509.385	4.72234	C26H56NO6P	LysoPC(O-18:2)	Level 2	Lipids: Glycerophospholipids	1.1612	1.00278	1.09193	43.0367	0.129394	0.149077	0.11405	NA
805.562	3.97074	C46H80NO8P	PC(38:6)	Level 2	Lipids: Glycerophospholipids	1.29196	0.957385	1.21427	1.24049	0.0872069	0.0898715	0.0223959	0.062591
914.587	3.72408	C49H87O13P	PI(40:4)	Level 2	Lipids: Glycerophospholipids	1.13038	1.0035	1.05875	not detected	0.125423	0.116151	0.139826	NA
763.536	3.65133	C40H78NO10P	PS(34:0)	Level 2	Lipids: Glycerophospholipids	1.764	1.1812	1.64547	1.12953	0.0710667	0.0904985	0.020124	0.0394726
757.562	4.01267	C42H80NO8P	PC(34:2)	Level 2	Lipids: Glycerophospholipids	1.28212	0.994084	1.19123	not detected	0.0374758	0.116757	0.0675428	NA
523.364	7.00586	C26H54NO7P	PC(18:0)	Level 2	Lipids: Glycerophospholipids	1.22398	0.896221	1.12679	not detected	0.201318	0.163753	0.328336	NA
751.553	3.89991	C43H78NO7P	PE(O-38:5)	Level 2	Lipids: Glycerophospholipids	0.859062	1.01485	0.788769	1.00453	0.0713123	0.0520503	0.0513454	0.175735
481.353	4.90538	C24H52NO6P	[LysoPC(16:2)] 1-hexadecyl-sn-glycero-3-phosphocholine	Level 2	Lipids: Glycerophospholipids	1.37333	1.1149	1.25009	not detected	0.144516	0.172803	0.137779	NA
733.562	5.03745	C40H80NO8P	PE(35:0)	Level 2	Lipids: Glycerophospholipids	1.36916	1.09216	1.23243	not detected	0.506546	0.579452	0.502735	NA
481.317	4.80457	C23H48NO7P	LysoPE(18:0)	Level 2	Lipids: Glycerophospholipids	0.913154	0.780691	0.821943	1.13146	0.113481	0.247355	0.237691	0.346123
523.364	4.65621	C26H54NO7P	LysoPC(18:0)	Level 2	Lipids: Glycerophospholipids	1.01872	0.997368	0.915697	not detected	0.0999881	0.158897	0.142565	NA
481.353	7.06816	C24H52NO6P	[PC methyl(15:2)] 1-pentadecyl-2-methyl-sn-glycero-3-phosphocholine	Level 2	Lipids: Glycerophospholipids	1.36023	0.909225	1.22151	not detected	0.0978518	0.0904443	0.0814111	NA
759.577	4.01966	C42H82NO8P	PC(34:1)	Level 2	Lipids: Glycerophospholipids	1.26569	0.946741	1.13205	1.23907	0.0531657	0.0990615	0.0765391	0.0787194
481.317	7.04788	C23H48NO7P	PC(15:0)	Level 2	Lipids: Glycerophospholipids	1.09883	0.846829	0.980367	not detected	0.13979	0.073248	0.0741857	NA
458.254	7.08585	C43H82O16P2	PIP(34:1)	Level 2	Lipids: Glycerophospholipids	1.7006	0.971676	1.49114	not detected	0.0942146	0.609366	0.28558	NA
1027.78	3.57277	C58H110NO11P	PS(52:0)	Level 2	Lipids: Glycerophospholipids	0.99157	1.08663	0.866738	1.03399	0.131029	0.152786	0.150554	0.426655
839.566	3.68651	C46H82NO10P	PS(40:4)	Level 2	Lipids: Glycerophospholipids	1.20583	1.10526	1.05067	1.17455	0.132806	0.0562033	0.110845	0.0618248
495.333	4.81543	C24H50NO7P	LysoPC(16:0)	Level 2	Lipids: Glycerophospholipids	0.926207	1.04988	0.803494	not detected	0.277911	0.128419	0.117821	NA
796.525	3.63171	C44H77O10P	PG(38:5)	Level 2	Lipids: Glycerophospholipids	1.51426	0.998958	1.31134	0.985948	0.0664439	0.0312715	0.110918	0.014288
809.593	3.97048	C46H84NO8P	PC(38:4)	Level 2	Lipids: Glycerophospholipids	1.38169	1.04139	1.19544	not detected	0.0707714	0.0968013	0.0656122	NA
862.557	3.74674	C45H83O13P	PI(36:2)	Level 2	Lipids: Glycerophospholipids	1.32805	1.02166	1.14078	not detected	0.121386	0.0700938	0.0906443	NA
879.583	3.77753	C45H86NO13P	[PI(36:0)	Level 2	Lipids: Glycerophospholipids	1.26701	1.13295	1.08534	1.09399	0.0692443	0.0478013	0.0120313	0.109633
698.489	3.85524	C39H71O8P	PA(36:3)	Level 2	Lipids: Glycerophospholipids	1.687	0.973121	1.44128	not detected	0.224022	0.264898	0.0292346	NA
748.525	3.68476	C40H77O10P	PG(34:1)	Level 2	Lipids: Glycerophospholipids	1.89571	1.08299	1.61915	not detected	0.106662	0.0382015	0.112785	NA
743.547	4.5205	C41H78NO8P	PC(33:2)	Level 2	Lipids: Glycerophospholipids	1.10438	0.895645	0.941496	not detected	0.408228	0.0402282	0.22731	NA
745.561	4.08101	C41H80NO8P	PE(36:1)	Level 2	Lipids: Glycerophospholipids	1.02225	0.870557	0.856158	not detected	0.19419	0.0167494	0.0223388	NA
451.306	4.918	C22H46NO6P	PC(14:1)	Level 2	Lipids: Glycerophospholipids	2.63471	1.15957	2.19815	not detected	0.128442	1.0768	1.06991	NA
759.578	4.95648	C42H82NO8P	PE(37:1)	Level 2	Lipids: Glycerophospholipids	0.952957	0.349924	0.78605	not detected	0.596583	0.246491	0.792685	NA
410.243	4.83067	C19H39O7P	[PA(16:0/0:0)] 1-hexadecanoyl-2-sn-glycero-3-phosphate	Level 2	Lipids: Glycerophospholipids	0.934513	1.20325	0.766224	not detected	0.290131	0.171353	0.148612	NA
835.608	3.96073	C48H86NO8P	PC(40:5)	Level 2	Lipids: Glycerophospholipids	1.34947	1.02549	1.1064	1.05425	0.017722	0.0854683	0.070649	0.115481
787.537	3.69725	C42H78NO10P	PS(36:2)	Level 2	Lipids: Glycerophospholipids	1.1928	0.918952	0.975635	1.33565	0.0449134	0.0642607	0.117347	0.0546928
479.338	4.73174	C24H50NO6P	LysoPC(O-16:1)	Level 2	Lipids: Glycerophospholipids	1.43808	1.15579	1.17014	52.9865	0.174029	0.16136	0.142072	NA
789.552	3.78661	C42H80NO10P	PS(36:1)	Level 2	Lipids: Glycerophospholipids	1.11552	0.850964	0.891549	1.224	0.0822644	0.0704573	0.121254	0.00539016
798.54	3.62176	C44H79O10P	PG(38:4)	Level 2	Lipids: Glycerophospholipids	1.64867	1.09238	1.31261	not detected	0.106942	0.0202333	0.114449	NA
801.553	3.65346	C43H80NO10P	PS(37:2)	Level 2	Lipids: Glycerophospholipids	1.65019	1.20341	1.31142	not detected	0.0846296	0.0886768	0.0841304	NA
785.593	3.99331	C44H84NO8P	PC(36:2)	Level 2	Lipids: Glycerophospholipids	1.21174	0.938597	0.961423	not detected	0.0814441	0.111085	0.044659	NA
743.546	4.01231	C41H78NO8P	PE(36:2)	Level 2	Lipids: Glycerophospholipids	1.07789	0.868355	0.844826	not detected	0.11611	0.068656	0.0884628	NA
864.572	3.74208	C45H85O13P	PI(36:1)	Level 2	Lipids: Glycerophospholipids	1.13268	0.950032	0.887303	not detected	0.0720464	0.065539	0.0823336	NA
772.525	3.62903	C42H77O10P	PG(36:3)	Level 2	Lipids: Glycerophospholipids	1.84412	1.21195	1.3974	not detected	0.0906254	0.0366691	0.0699936	NA
465.322	4.824	C23H48NO6P	LysoPE(18:1)	Level 2	Lipids: Glycerophospholipids	1.58204	0.908103	1.197	1.59121	0.355105	0.159436	0.144063	1.06138
833.593	3.95756	C48H84NO8P	PC(40:6)	Level 2	Lipids: Glycerophospholipids	1.24667	0.926401	0.937953	1.20565	0.0775175	0.142585	0.136733	0.0902394
437.291	4.73966	C21H44NO6P	[PE(16:1)] 1-(1Z-hexadecenyl)-sn-glycero-3-phosphoethanolamine	Level 2	Lipids: Glycerophospholipids	1.36828	1.12467	1.02865	not detected	0.137579	0.146785	0.0720489	NA
822.541	3.61369	C46H79O10P	PG(40:6)	Level 2	Lipids: Glycerophospholipids	1.54163	1.17176	1.14227	not detected	0.167968	0.0929773	0.117434	NA
824.556	3.61496	C46H81O10P	PG(40:5)	Level 2	Lipids: Glycerophospholipids	1.66854	1.11437	1.23227	not detected	0.184267	0.0946048	0.0300496	NA
831.578	3.95691	C48H82NO8P	PC(40:7)	Level 2	Lipids: Glycerophospholipids	1.40668	1.03376	1.03579	not detected	0.118034	0.181515	0.133956	NA
1038.79	3.57283	C60H111O11P	PG(54:0)	Level 2	Lipids: Glycerophospholipids	0.950997	1.04753	0.667659	not detected	0.0717814	0.177853	0.0787493	NA
791.567	3.63206	C42H82NO10P	PS(36:0)	Level 2	Lipids: Glycerophospholipids	1.75482	1.14995	1.19879	1.16338	0.0647539	0.0942923	0.00919302	0.0336836
471.262	7.08894	C45H84O16P2	PIP(36:2)	Level 2	Lipids: Glycerophospholipids	1.74784	1.10714	1.15338	not detected	0.262837	0.333479	0.203988	NA
774.541	3.62748	C42H79O10P	PG(36:2)	Level 2	Lipids: Glycerophospholipids	1.77893	1.09399	1.17119	not detected	0.103547	0.0253793	0.127954	NA
776.556	3.68717	C42H81O10P	PG(36:1)	Level 2	Lipids: Glycerophospholipids	1.71896	1.16116	1.11082	not detected	0.0856898	0.0382797	0.127956	NA
330.277	4.13218	C19H38O4	MG(0:0/16:0/0:0)	Level 2	Lipids: Glycerolipids	1.18709	1.29456	1.71169	not detected	0.708259	0.793212	0.0642844	NA
550.496	3.82055	C35H66O4	DG(P-32:1)	Level 2	Lipids: Glycerolipids	1.00786	1.10474	1.12489	not detected	0.222835	0.237743	0.0969461	NA
602.527	3.71533	C39H70O4	1-(14-methyl-pentadecanoyl)-2-(8-[3]-ladderane-octanyl)-sn-glycerol	Level 2	Lipids: Glycerolipids	1.61415	1.16411	1.15413	1.17899	0.0338703	0.0346972	0.0299069	0.0652393
813.977	5.05857	C79H141N3O31	Ganglioside GM1 (d18:1/24:1(15Z))	Level 2	Lipids: Gangliosides	0.809553	0.927347	0.983427	not detected	0.101201	0.132546	0.0984407	NA
1226.75	7.10981	C60H110N2O23	Ganglioside GA1 (d18:1/16:0)	Level 2	Lipids: Gangliosides	0.966021	1.02063	0.89249	not detected	0.379847	0.20975	0.0634392	NA
242.225	3.96998	C15H30O2	FA methyl(14:0)	Level 2	Lipids: Fatty Acyls	1.11994	0.825377	4.93876	not detected	0.519562	0.214805	0.987425	NA
244.167	5.1003	C13H24O4	FA methyl(14:0) dodecanedioic acid	Level 2	Lipids: Fatty Acyls	1.43082	0.709242	5.21621	not detected	0.623601	0.21462	1.00047	NA
270.256	3.91515	C17H34O2	FA (17:0)	Level 2	Lipids: Fatty Acyls	1.0201	0.891007	3.54231	not detected	0.483931	0.151967	0.908488	NA
396.251	4.25154	C22H36O6	methyl 8-[3,5-epidioxy-2-(3-hydroperoxy-1-pentenyl)-cyclopentyl]-octanoate	Level 2	Lipids: Fatty Acyls	0.444147	0.858247	1.48136	not detected	1.11129	0.796229	0.358341	NA
340.188	4.32631	C18H28O6	11-dehydro-2,3-dinor-TXB2	Level 2	Lipids: Fatty Acyls	0.629359	1.2752	2.07459	not detected	0.944532	0.635325	0.451079	NA
174.126	5.07214	C9H18O3	FA hydroxy(9:0) hydroxy-nonanoic acid	Level 2	Lipids: Fatty Acyls	1.06164	1.116	3.08499	not detected	0.335386	0.06716	1.03352	NA
214.193	4.04773	C13H26O2	FA methyl(12:0) dodecanoic acid	Level 2	Lipids: Fatty Acyls	1.39956	1.00137	3.80053	not detected	0.390142	0.195138	0.91113	NA
116.084	5.07128	C6H12O2	Hexanoic acid	Level 2	Lipids: Fatty Acyls	1.334	1.0658	3.58712	not detected	0.337543	0.0202251	0.885652	NA
298.287	3.86476	C19H38O2	FA methyl(18:0)	Level 2	Lipids: Fatty Acyls	0.890785	0.858788	2.24627	not detected	0.367324	0.0881731	0.602194	NA
142.099	4.60098	C8H14O2	FA (8:1)	Level 2	Lipids: Fatty Acyls	1.20006	0.872869	2.80047	not detected	0.337443	0.156028	0.802308	NA
174.089	10.6702	C8H14O4	Suberic acid	Level 2	Lipids: Fatty Acyls	0.72082	0.609186	1.63674	not detected	0.44663	0.369691	0.890784	NA
118.063	10.1868	C5H10O3	5-Hydroxypentanoate	Level 2	Lipids: Fatty Acyls	0.999835	1.03913	2.21968	not detected	0.880182	1.10741	0.644358	NA
158.094	5.08859	C8H14O3	FA oxo(8:0) oxo-octanoic acid	Level 2	Lipids: Fatty Acyls	0.874702	0.76002	1.88098	not detected	0.0732311	0.1021	0.669054	NA
300.266	4.0161	C18H36O3	FA hydroxy(18:0)	Level 2	Lipids: Fatty Acyls	1.15051	0.950054	2.45716	not detected	0.136564	0.0573608	0.683086	NA
258.183	4.15698	C14H26O4	FA methyl(15:0) tridecanedioic acid	Level 2	Lipids: Fatty Acyls	0.367956	1.22569	0.762229	not detected	0.898097	0.690568	0.261401	NA
188.141	4.30443	C10H20O3	FA hydroxy(10:0)	Level 2	Lipids: Fatty Acyls	1.80513	1.26645	3.63742	not detected	0.259268	0.2361	0.811275	NA
200.141	4.46807	C11H20O3	[FA hydroxy(11:1)] undecenoic acid	Level 2	Lipids: Fatty Acyls	1.1642	0.973574	2.30058	not detected	0.168011	0.0906075	0.735237	NA
268.24	3.93574	C17H32O2	FA methyl(16:1)	Level 2	Lipids: Fatty Acyls	1.05655	0.940095	2.08656	not detected	0.0812203	0.146812	0.364132	NA
174.126	4.48011	C9H18O3	[FA hydroxy(9:0)] 2-hydroxy-nonanoic acid	Level 2	Lipids: Fatty Acyls	1.19186	1.06035	2.35237	not detected	0.212058	0.33422	0.675785	NA
214.157	4.1964	C12H22O3	3-Oxododecanoic acid	Level 2	Lipids: Fatty Acyls	0.485585	1.13953	0.927518	not detected	0.435343	0.189608	0.179892	NA
298.251	3.93611	C18H34O3	FA oxo(18:0)	Level 2	Lipids: Fatty Acyls	1.27425	0.91664	2.43014	not detected	0.166916	0.117889	0.68137	NA
226.193	4.02943	C14H26O2	FA (14:1) tetradecenoic acid	Level 2	Lipids: Fatty Acyls	0.855571	0.825736	1.59468	not detected	0.0967585	0.404427	0.43625	NA
312.303	3.83394	C20H40O2	FA (20:0)	Level 2	Lipids: Fatty Acyls	1.02427	0.985034	1.86404	not detected	0.294343	0.11705	0.419942	NA
292.204	4.08255	C18H28O3	12-OPDA	Level 2	Lipids: Fatty Acyls	0.927712	1.00139	1.46019	not detected	0.880359	0.866049	0.128575	NA
218.116	11.5326	C10H18O5	3-Hydroxysebacicacid	Level 2	Lipids: Fatty Acyls	2.31596	1.34719	3.4995	not detected	0.268059	0.222241	0.242809	NA
100.089	4.21737	C6H12O	[FA (6:0)] hexanal	Level 2	Lipids: Fatty Acyls	0.651649	1.01576	0.952717	not detected	0.207356	0.154218	0.0394684	NA
340.298	5.01072	C21H40O3	FA oxo(21:0)	Level 2	Lipids: Fatty Acyls	1.25582	1.29027	1.81017	not detected	0.785956	0.754059	0.0980166	NA
340.298	5.75019	C21H40O3	[FA oxo(21:0)] 2-oxo-heneicosanoic acid	Level 2	Lipids: Fatty Acyls	1.16753	1.2911	1.67423	not detected	0.806317	0.779412	0.0250543	NA
328.24	3.86115	C22H32O2	Docosahexaenoicacid	Level 2	Lipids: Fatty Acyls	1.11317	0.978377	1.57123	not detected	0.19089	0.164191	0.304263	NA
304.24	3.92393	C20H32O2	FA (20:4)	Level 2	Lipids: Fatty Acyls	1.06068	1.19542	1.45241	not detected	0.0563734	0.138475	0.146948	NA
330.256	3.8584	C22H34O2	[FA (22:5)] 7Z,10Z,13Z,16Z,19Z-docosapentaenoic acid	Level 2	Lipids: Fatty Acyls	0.976148	1.04072	1.33358	not detected	0.137878	0.20697	0.113713	NA
160.11	7.07972	C8H16O3	FA hydroxy(8:0) hydroxy-octanoic acid	Level 2	Lipids: Fatty Acyls	0.978506	0.871325	1.33439	not detected	0.0780488	0.0779706	0.380417	NA
190.172	4.19874	C14H22	3,5,7-Trimethyl-2E,4E,6E,8E-undecatetraene	Level 2	Lipids: Fatty Acyls	0.644079	1.1844	0.849736	not detected	0.8016	0.111287	0.201028	NA
278.225	3.92566	C18H30O2	[FA (18:3)] 9Z,12Z,15Z-octadecatrienoic acid	Level 2	Lipids: Fatty Acyls	1.07374	1.07063	1.31866	not detected	0.0643341	0.217621	0.153881	NA
396.397	3.73497	C26H52O2	[FA (26:0)] hexacosanoic acid	Level 2	Lipids: Fatty Acyls	0.950601	0.87743	1.09893	not detected	0.287434	0.369359	0.352231	NA
231.147	8.83796	C11H21NO4	O-Butanoylcarnitine	Level 2	Lipids: Fatty Acyls	1.10971	0.991789	1.22416	not detected	0.165374	0.0684501	0.104044	NA
296.271	3.8713	C19H36O2	FA (19:1)	Level 2	Lipids: Fatty Acyls	1.04534	0.87634	1.13704	not detected	0.178042	0.24674	0.1286	NA
314.246	4.02792	C18H34O4	FA hydroxy(18:1)]	Level 2	Lipids: Fatty Acyls	0.932577	0.863716	1.00328	not detected	0.062882	0.102011	0.195067	NA
399.335	4.69313	C23H45NO4	O-Palmitoyl-R-carnitine	Level 2	Lipids: Fatty Acyls	1.50777	1.01783	1.59191	not detected	0.24615	0.0733758	0.154051	NA
312.266	3.89995	C19H36O3	FA oxo(19:0)	Level 2	Lipids: Fatty Acyls	1.22639	0.990942	1.25253	1.00329	0.120503	0.278245	0.0297124	0.224367
217.131	9.82961	C10H19NO4	O-Propanoylcarnitine	Level 2	Lipids: Fatty Acyls	1.17693	1.01557	1.19899	1.10638	0.524925	0.154249	0.156079	0.475336
126.105	4.20862	C8H14O	FA (8:1) octenal	Level 2	Lipids: Fatty Acyls	0.939168	0.907625	0.934535	not detected	0.318571	0.121961	0.197261	NA
276.222	7.09159	C16H33ClO	2-chlorohexadecanol	Level 2	Lipids: Fatty Acyls	1.07465	1.00207	0.995734	not detected	0.155702	0.125529	0.0284519	NA
320.235	3.95514	C20H32O3	[FA hydroxy(20:4)] 15S-hydroxy-5Z,8Z,11Z,13E-eicosatetraenoic acid	Level 2	Lipids: Fatty Acyls	0.926411	1.12939	0.845993	not detected	0.123838	0.36578	1.15547	NA
340.298	6.57553	C21H40O3	[FA oxo(21:0)] 20-oxo-heneicosanoic acid	Level 2	Lipids: Fatty Acyls	1.1376	0.88602	0.968668	not detected	0.730088	0.77621	0.400883	NA
98.0368	13.8839	C5H6O2	[FA (5:2)] 2,4-pentadienoic acid	Level 2	Lipids: Fatty Acyls	1.27341	0.943953	0.948628	1.16789	0.411252	0.471942	0.102142	0.0968272
208.183	4.21549	C14H24O	FA (14:2) tetradecadienal	Level 2	Lipids: Fatty Acyls	0.936148	0.967668	0.650278	not detected	1.01136	0.254716	0.221036	NA
112.125	3.92778	C8H16	3-methyl-1-heptene	Level 2	Lipids: Fatty Acyls	2.6038	1.39724	1.80395	1.01758	0.197782	0.25325	0.450266	0.825663
173.142	5.10864	C9H19NO2	[FA amino(9:0)] 3R-aminononanoic acid	Level 2	Lipids: Fatty Acyls	1.32498	1.19381	0.897114	not detected	0.933883	0.707224	0.190223	NA
240.209	3.98807	C15H28O2	[FA dimethyl(13:0)] 2,5-dimethyl-2E-tridecenoic acid	Level 2	Lipids: Fatty Acyls	1.17234	0.743185	0.77838	not detected	0.244603	0.589994	1.10421	NA
310.287	3.84515	C20H38O2	[FA (20:1)] 11Z-eicosenoic acid	Level 2	Lipids: Fatty Acyls	1.16246	1.09618	0.724431	not detected	0.209362	0.336562	0.86939	NA
146.058	5.51483	C6H10O4	[FA oxo,hydroxy(6:0)] 2-oxo-4-hydroxy-hexanoic acid	Level 2	Lipids: Fatty Acyls	1.21084	0.845791	0.674315	not detected	1.33196	0.961091	0.389437	NA
896.768	6.17423	C54H104O9	1-O-[(6'-O-tetradecanoyl)-a-D-glucopyranosyl]-(2-tetradecanoyloxy)-eicosane	Level 2	Lipids: Fatty Acyls	3.16715	0.917886	1.56373	1.39315	0.121022	0.197368	0.264172	0.178299
150.141	4.22085	C11H18	4,8-Dimethyl-1,3E,7-nonatriene	Level 2	Lipids: Fatty Acyls	1.11696	1.35946	0.236023	not detected	NA	0.3909	NA	NA
254.225	3.94051	C16H30O2	FA(16:1)	Level 2	Lipid Metabolism	1.1954	1.07084	1.96946	not detected	0.133178	0.209061	0.21887	NA
340.334	3.80997	C22H44O2	Docosanoic acid	Level 2	Lipid Metabolism	0.99712	0.948454	1.52148	not detected	0.257036	0.153231	0.13966	NA
921.252	14.2569	C31H54N7O17P3S	Decanoyl-CoA	Level 2	Lipid Metabolism	1.29821	0.993296	1.95944	not detected	0.157208	0.297606	0.148591	NA
446.061	16.225	C11H20N4O11P2	CDP-ethanolamine	Level 2	Lipid Metabolism	0.772423	1.1475	1.13151	1.76839	0.176064	0.0759348	0.113735	0.156526
449.314	4.92532	C26H43NO5	Chenodeoxyglycocholate	Level 2	Lipid Metabolism	34.2361	not detected	37.1464	not detected	0.0952732	NA	0.206095	NA
368.365	3.77099	C24H48O2	Tetracosanoic acid	Level 2	Lipid Metabolism	1.17352	0.902398	1.26882	not detected	0.189385	0.192557	0.231524	NA
410.243	7.03989	C19H39O7P	LPA(0:0/16:0)	Level 2	Lipid Metabolism	0.894506	0.854704	0.851483	not detected	0.257745	0.155499	0.216399	NA
436.259	4.78854	C21H41O7P	PA(18:1(9Z)/0:0)	Level 2	Lipid Metabolism	0.919295	1.02616	0.844901	not detected	0.212239	0.274128	0.0148536	NA
216.04	13.1881	C5H13O7P	2-C-Methyl-D-erythritol 4-phosphate	Level 2	Lipid Metabolism	0.665753	1.20876	0.475295	not detected	0.478377	0.881771	0.032153	NA
308.271	3.87641	C20H36O2	Icosadienoic acid	Level 2	Lipid Metabolism	1.18137	1.03505	0.782108	not detected	0.230424	0.203524	0.866238	NA
215.056	15.5513	C5H14NO6P	sn-glycero-3-Phosphoethanolamine	Level 2	Lipid Metabolism	1.2234	1.01986	0.805444	1.19388	0.228262	0.172108	0.158352	0.147067
169.05	14.8931	C4H12NO4P	Phosphodimethylethanolamine	Level 2	Lipid Metabolism	1.19772	0.900307	0.633653	not detected	0.108361	0.138671	0.212934	NA
257.103	14.4025	C8H20NO6P	sn-glycero-3-Phosphocholine	Level 2	Lipid Metabolism	1.81574	1.05167	0.908881	1.7464	0.340138	0.126744	0.101389	0.0912495
472.113	14.3377	C14H26N4O10P2	CMP-N-trimethyl-2-aminoethylphosphonate	Level 2	Lipid Metabolism	2.25793	0.862004	0.830196	1.36282	0.13725	0.0539535	0.199871	0.120276
305.122	14.5906	C11H19N3O7	Glu-Ala-Ser	Level 2	Peptide(tri-)	2.22189	1.52006	15.2099	9.78946	0.247184	0.113291	0.247763	0.124978
291.107	15.5955	C10H17N3O7	Ala-Asp-Ser	Level 2	Peptide(tri-)	1.6355	1.22513	6.34857	6.29853	0.0733229	0.436588	0.0946274	0.204925
316.186	13.8329	C12H24N6O4	Ala-Ala-Arg	Level 2	Peptide(tri-)	4.82175	2.45742	13.6144	not detected	0.249194	0.311811	0.201869	NA
275.148	18.1547	C11H21N3O5	Ile-Gly-Ser	Level 2	Peptide(tri-)	2.87188	1.4081	7.60131	6.11245	0.155358	0.166812	0.0688006	0.153751
319.154	8.11656	C16H21N3O4	Phe-Gly-Pro	Level 2	Peptide(tri-)	39.6556	not detected	91.09	not detected	0.416741	NA	0.136728	NA
457.184	13.8654	C23H27N3O7	Glu-Phe-Tyr	Level 2	Peptide(tri-)	2.87496	1.82065	6.04086	not detected	0.259933	0.209555	0.0482319	NA
261.096	15.5596	C9H15N3O6	Ala-Asp-Gly	Level 2	Peptide(tri-)	2.09605	1.54696	4.21124	1.22269	0.0802314	0.153851	0.170197	0.0757529
379.141	12.1789	C14H25N3O7S	Glu-Met-Thr	Level 2	Peptide(tri-)	1.49483	0.966352	2.91702	0.162927	0.823401	0.718206	0.0671412	0.390958
346.16	15.6775	C12H22N6O6	Asp-Gly-Arg	Level 2	Peptide(tri-)	0.847978	0.943215	1.60725	2.45965	0.394219	0.238516	0.386732	0.140899
257.138	15.1519	C11H19N3O4	Ala-Ala-Pro	Level 2	Peptide(tri-)	3.03022	1.21531	5.42869	0.865236	0.211199	0.211179	0.142908	0.298624
309.132	8.15662	C14H19N3O5	Ala-Gly-Tyr	Level 2	Peptide(tri-)	1.6776	1.17548	2.97539	not detected	0.180412	0.0476114	0.162168	NA
365.126	13.2699	C13H23N3O7S	Met-Thr-Asp	Level 2	Peptide(tri-)	0.519043	0.685024	0.917418	2.33505	0.336746	0.258769	0.174365	0.2039
516.292	12.5407	C23H36N10O4	Trp-Arg-Arg	Level 2	Peptide(tri-)	8.11027	1.24459	14.3192	not detected	0.120896	0.119559	0.115522	NA
326.159	11.3381	C14H22N4O5	Asn-Pro-Pro	Level 2	Peptide(tri-)	1.66567	1.4188	2.86801	not detected	0.249047	0.0964392	0.12032	NA
291.143	15.7131	C11H21N3O6	Thr-Thr-Ala	Level 2	Peptide(tri-)	2.5803	1.17152	4.24793	not detected	0.17279	0.43535	0.25983	NA
323.148	8.10045	C15H21N3O5	Ala-Ala-Tyr	Level 2	Peptide(tri-)	0.907435	1.10098	1.3889	not detected	0.346955	0.750411	0.360681	NA
273.169	12.0077	C12H23N3O4	Ile-Ala-Ala	Level 2	Peptide(tri-)	2.26906	1.31292	3.4637	0.839873	0.250645	0.175633	0.0864826	0.167603
356.243	12.359	C17H32N4O4	Leu-Lys-Pro	Level 2	Peptide(tri-)	128.926	15.392	194.146	not detected	0.41668	NA	0.15204	NA
247.117	16.5719	C9H17N3O5	Ala-Ala-Ser	Level 2	Peptide(tri-)	1.8811	1.44243	2.77696	0.804094	0.158518	0.198123	0.0923887	0.165458
346.222	17.3275	C15H30N4O5	Ile-Lys-Ser	Level 2	Peptide(tri-)	1.51164	1.22094	2.19673	2.05742	0.218639	0.201961	0.31711	0.222963
285.169	8.62379	C13H23N3O4	Leu-Gly-Pro	Level 2	Peptide(tri-)	1.81647	1.45034	2.63146	not detected	0.207837	0.172472	0.125928	NA
345.19	9.23359	C15H27N3O6	Glu-Val-Val	Level 2	Peptide(tri-)	2.33885	1.42552	3.3807	not detected	0.117199	0.473481	0.108702	NA
401.137	12.6226	C15H23N5O6S	Met-Asp-His	Level 2	Peptide(tri-)	1.58279	1.07868	2.28142	2.83852	0.195678	0.142367	0.178844	0.130627
411.131	14.0447	C15H29N3O4S3	Met-Met-Met	Level 2	Peptide(tri-)	1.0351	0.946594	1.47406	not detected	0.29424	0.159419	0.161315	NA
243.122	12.5962	C10H17N3O4	Ala-Gly-Pro	Level 2	Peptide(tri-)	5.67703	1.50529	8.02116	1.25431	0.25073	0.0680899	0.294773	0.0743168
480.201	12.8062	C25H28N4O6	Glu-Phe-Trp	Level 2	Peptide(tri-)	3.08134	1.52424	4.33721	not detected	0.144031	0.0717085	0.117444	NA
333.117	16.0529	C12H19N3O8	Glu-Ala-Asp	Level 2	Peptide(tri-)	1.30187	1.09391	1.8181	not detected	0.172232	0.157589	0.0450189	NA
287.148	15.1193	C12H21N3O5	Thr-Ala-Pro	Level 2	Peptide(tri-)	1.66768	1.2926	2.28744	1.0538	0.19463	0.132571	0.154862	0.130451
317.122	13.1847	C12H19N3O7	Asp-Pro-Ser	Level 2	Peptide(tri-)	1.57684	1.15776	2.10557	1.96411	0.109509	0.189261	0.12146	0.267803
307.084	16.2467	C10H17N3O6S	Ala-Asp-Cys	Level 2	Peptide(tri-)	1.61574	0.999043	2.13771	not detected	0.1224	0.0115	0.0375013	NA
233.101	12.8992	C8H15N3O5	Ala-Gly-Ser	Level 2	Peptide(tri-)	2.28181	1.31859	3.01341	0.583024	0.127813	0.220174	0.131832	0.037072
361.124	16.0214	C12H19N5O8	Asn-Asn-Asp	Level 2	Peptide(tri-)	1.44756	1.03041	1.8699	1.30514	0.148459	0.118335	0.186638	0.101224
408.147	15.4027	C18H24N4O5S	Thr-Trp-Cys	Level 2	Peptide(tri-)	1.41667	1.17568	1.78945	2.28587	0.140549	0.132566	0.10646	0.360213
317.196	16.6488	C14H27N3O5	Ile-Ser-Val	Level 2	Peptide(tri-)	1.65033	1.16802	2.0815	not detected	0.138407	0.0736183	0.0038065	NA
343.174	11.2516	C15H25N3O6	Glu-Pro-Val	Level 2	Peptide(tri-)	1.43321	1.17631	1.75239	not detected	0.337296	0.0946928	0.188675	NA
259.153	8.48294	C11H21N3O4	Ile-Ala-Gly	Level 2	Peptide(tri-)	4.16725	1.28895	5.07347	not detected	0.0648405	0.137712	0.144881	NA
365.126	12.0038	C13H23N3O7S	Glu-Met-Ser	Level 2	Peptide(tri-)	1.37326	1.21403	1.64886	0.643279	0.46898	0.276123	0.177705	0.417102
277.128	16.5338	C10H19N3O6	Thr-Ala-Ser	Level 2	Peptide(tri-)	3.51052	1.3604	4.0972	1.0937	0.197135	0.254333	0.0937867	0.216558
417.165	11.071	C19H23N5O6	Phe-Asp-His	Level 2	Peptide(tri-)	1.61418	1.3223	1.86185	0.542999	0.172285	0.151248	0.108865	0.210264
357.19	21.3718	C16H27N3O6	Glu-Ile-Pro	Level 2	Peptide(tri-)	152.78	not detected	175.464	not detected	0.239425	NA	0.0976416	NA
269.138	12.1293	C12H19N3O4	Gly-Pro-Pro	Level 2	Peptide(tri-)	2.32443	1.6074	2.65028	1.3947	0.0954765	0.25362	0.189514	0.0873221
245.138	8.80215	C10H19N3O4	Ile-Gly-Gly	Level 2	Peptide(tri-)	2.72671	1.28846	3.05406	not detected	0.631926	0.242606	0.735426	NA
319.102	16.6631	C11H17N3O8	Ala-Asp-Asp	Level 2	Peptide(tri-)	1.5221	1.12805	1.70205	2.33477	0.16238	0.190189	0.126123	0.145397
388.232	12.5971	C17H32N4O6	Glu-Ile-Lys	Level 2	Peptide(tri-)	193.828	14.0335	214.974	not detected	0.226384	NA	0.0871545	NA
271.153	8.989	C12H21N3O4	Val-Gly-Pro	Level 2	Peptide(tri-)	0.662128	1.1904	0.713098	0.458765	0.205924	0.238417	0.181155	0.328609
340.186	15.6122	C14H24N6O4	Lys-Gly-His	Level 2	Peptide(tri-)	8.02385	1.68755	8.60667	1.36991	0.575	0.731907	0.238966	0.263343
424.159	11.4746	C18H24N4O8	Asp-Gln-Tyr	Level 2	Peptide(tri-)	1.63594	1.0887	1.74659	not detected	0.167894	0.26382	0.103835	NA
333.154	11.4823	C13H23N3O7	Glu-Ser-Val	Level 2	Peptide(tri-)	1.03803	0.99449	1.07278	0.806805	0.25511	0.208937	0.0957355	0.204229
315.18	8.23134	C14H25N3O5	Ile-Pro-Ser	Level 2	Peptide(tri-)	5.40054	1.64792	5.36542	not detected	0.233097	0.104892	0.194434	NA
274.164	16.1954	C11H22N4O4	Lys-Ala-Gly	Level 2	Peptide(tri-)	6.01579	1.24857	5.97156	1.25936	0.290662	0.0585493	0.119737	0.108619
334.185	15.408	C13H26N4O6	Lys-Thr-Ser	Level 2	Peptide(tri-)	1.27367	1.31093	1.26072	1.14265	0.213174	0.13374	0.106572	0.131172
379.105	13.1437	C13H21N3O8S	Glu-Cys-Glu	Level 2	Peptide(tri-)	1.1993	1.07375	1.18697	1.54222	0.220808	0.704345	0.241138	0.0515899
305.086	17.0518	C10H15N3O8	Asp-Asp-Gly	Level 2	Peptide(tri-)	1.1789	1.00686	1.13332	1.73255	0.0872241	0.0828107	0.172849	0.254506
356.242	21.0175	C17H32N4O4	Ile-Lys-Pro	Level 2	Peptide(tri-)	1.19487	1.07096	1.1462	1.43158	0.215852	0.034181	0.115541	0.167645
317.159	11.0108	C13H23N3O6	Glu-Ala-Val	Level 2	Peptide(tri-)	1.88799	1.53728	1.77498	1.23579	0.325156	0.185012	0.07604	0.165447
260.112	13.5663	C9H16N4O5	Ala-Asn-Gly	Level 2	Peptide(tri-)	6.42716	1.52959	5.9831	not detected	0.118353	0.1194	0.139757	NA
263.094	9.58825	C9H17N3O4S	Ala-Ala-Cys	Level 2	Peptide(tri-)	3.57293	1.1599	3.30731	not detected	0.10361	0.29029	0.211938	NA
402.19	8.34494	C20H26N4O5	Thr-Trp-Pro	Level 2	Peptide(tri-)	2.01838	1.1088	1.8557	0.668808	0.0471072	0.173208	0.0673676	0.151174
231.122	10.2903	C9H17N3O4	Ala-Ala-Ala	Level 2	Peptide(tri-)	1.73609	1.25665	1.59567	0.634929	0.0911719	0.156032	0.0939496	0.352616
369.165	12.688	C15H23N5O6	Val-Asp-His	Level 2	Peptide(tri-)	1.88911	1.37166	1.70745	0.671677	0.234314	0.163466	0.131305	0.161494
288.155	17.3017	C10H20N6O4	Gly-Gly-Arg	Level 2	Peptide(tri-)	6.803	1.42444	6.14459	not detected	0.224892	0.148306	0.0777383	NA
400.207	16.6369	C16H28N6O6	Glu-Arg-Pro	Level 2	Peptide(tri-)	169.41	12.2498	144.775	not detected	0.349573	NA	0.0385745	NA
344.134	15.6133	C13H20N4O7	Asn-Asp-Pro	Level 2	Peptide(tri-)	2.50137	1.50679	2.12346	not detected	0.327846	0.0732451	0.129287	NA
315.143	14.5205	C13H21N3O6	Glu-Ala-Pro	Level 2	Peptide(tri-)	1.40257	1.35221	1.17383	0.712419	0.36188	0.0339252	0.139552	0.0873346
303.143	12.734	C12H21N3O6	Glu-Gly-Val	Level 2	Peptide(tri-)	2.6441	1.06111	2.19153	not detected	0.143019	0.177035	0.00213528	NA
347.133	16.0289	C13H21N3O8	Glu-Ala-Glu	Level 2	Peptide(tri-)	2.22219	1.41678	1.81936	0.930722	0.200355	0.204052	0.0683316	0.136443
421.171	10.9306	C17H23N7O6	Glu-His-His	Level 2	Peptide(tri-)	2.47402	1.24482	1.95481	2.02123	0.252294	0.128951	0.0554455	0.323597
373.148	16.7914	C15H23N3O8	Glu-Glu-Pro	Level 2	Peptide(tri-)	2.1483	1.27851	1.63544	0.737413	0.13663	0.100047	0.186915	0.182109
413.155	13.1956	C16H23N5O8	Glu-Glu-His	Level 2	Peptide(tri-)	1.42592	1.28052	1.05138	0.982894	0.115151	0.0923044	0.0217462	0.449086
316.211	12.5653	C14H28N4O4	Ile-Gly-Lys	Level 2	Peptide(tri-)	229.714	not detected	167.799	3.87702	0.350049	NA	0.175911	0.210658
331.175	10.9463	C14H25N3O6	Glu-Ala-Ile	Level 2	Peptide(tri-)	3.22413	1.31918	2.32498	0.91907	0.475319	0.495548	0.0443472	0.132292
361.148	15.8571	C14H23N3O8	Glu-Asp-Val	Level 2	Peptide(tri-)	2.89534	1.27583	1.988	0.694212	0.213666	0.0709385	0.0980771	0.0819469
301.127	14.697	C12H19N3O6	Ala-Asp-Pro	Level 2	Peptide(tri-)	1.35806	1.2173	0.840476	0.755385	0.217475	0.126989	0.0661845	0.15795
377.144	13.076	C14H23N3O9	Glu-Glu-Thr	Level 2	Peptide(tri-)	1.97592	0.988515	1.21453	1.53217	0.197871	0.273653	0.199341	0.343607
300.144	12.5127	C12H20N4O5	Ala-Asn-Pro	Level 2	Peptide(tri-)	2.65609	1.20796	1.62202	0.983726	0.378663	0.12521	0.139624	0.0889518
319.157	11.8393	C13H25N3O4S	Ile-Gly-Met	Level 2	Peptide(tri-)	8.57468	1.14526	5.12932	2.03953	0.361698	0.16957	0.0767197	0.0464554
360.175	15.1585	C13H24N6O6	Ala-Asp-Arg	Level 2	Peptide(tri-)	3.21733	1.30691	1.90082	2.33154	0.390328	0.0860482	0.331363	0.284713
342.19	8.8282	C15H26N4O5	Ile-Asn-Pro	Level 2	Peptide(tri-)	2.36064	1.2028	1.32501	not detected	0.225786	0.082338	0.214029	NA
279.107	14.9086	C9H17N3O7	Ser-Ser-Ser	Level 2	Peptide(tri-)	2.35949	1.26486	0.390352	not detected	0.490676	0.365992	NA	NA
488.187	14.9776	C19H32N6O5S2	Ala-Met-Met-His	Level 2	Peptide(tetra-)	not detected	0.884836	2.578	not detected	NA	0.268112	0.0563371	NA
440.104	16.5811	C14H24N4O8S2	Asp-Thr-Cys-Cys	Level 2	Peptide(tetra-)	41.983	7.23858	168.475	1.57532	1.0565	NA	0.128142	0.146558
443.202	12.7025	C18H29N5O8	Asn-Val-Asp-Pro	Level 2	Peptide(tetra-)	0.909652	1.8233	2.82812	not detected	0.297214	0.243931	0.232228	NA
459.244	13.6459	C18H33N7O7	Ala-Lys-Asn-Gln	Level 2	Peptide(tetra-)	4.61888	2.65728	13.7817	not detected	0.425499	0.484042	0.295658	NA
413.263	12.7236	C19H35N5O5	Ala-Lys-Val-Pro	Level 2	Peptide(tetra-)	3.35016	1.7827	9.80527	0.935511	0.10516	0.207249	0.244433	0.0854386
465.259	11.6428	C22H35N5O6	Ala-Lys-Phe-Thr	Level 2	Peptide(tetra-)	3.27549	1.63133	8.3129	not detected	0.398564	0.12307	0.192258	NA
364.105	14.8743	C12H20N4O7S	Ala-Asp-Cys-Gly	Level 2	Peptide(tetra-)	2.34619	1.39006	5.95388	not detected	0.103833	0.269327	0.0660346	NA
535.192	14.5502	C24H33N5O5S2	Cys-Met-Trp-Pro	Level 2	Peptide(tetra-)	0.958918	1.48092	2.25111	not detected	1.14318	0.19954	0.0823515	NA
375.139	15.6622	C13H21N5O8	Ala-Asn-Asp-Gly	Level 2	Peptide(tetra-)	3.80752	1.99692	8.05882	0.90652	0.135894	0.354373	0.258985	0.161889
516.291	12.5559	C22H40N6O8	Glu-Ile-Gln-Lys	Level 2	Peptide(tetra-)	14.3206	1.66429	29.6199	1.33718	0.22903	0.166062	0.272259	0.0771268
464.17	11.5006	C16H28N6O8S	Asn-Met-Asn-Ser	Level 2	Peptide(tetra-)	8.34935	not detected	16.4783	not detected	1.11033	NA	0.17697	NA
374.18	12.4575	C15H26N4O7	Ala-Leu-Asp-Gly	Level 2	Peptide(tetra-)	3.98757	1.50961	7.5948	not detected	0.204527	0.272537	0.158848	NA
362.144	15.2809	C13H22N4O8	Ala-Ala-Asp-Ser	Level 2	Peptide(tetra-)	4.72509	2.04279	8.97403	2.09934	0.276626	0.101305	0.0945349	0.0942791
404.191	16.5671	C16H28N4O8	Ala-Thr-Val-Asp	Level 2	Peptide(tetra-)	1.83743	1.609	3.48416	not detected	0.284035	0.264341	0.0464689	NA
463.21	12.2208	C18H33N5O7S	Ala-Lys-Met-Asp	Level 2	Peptide(tetra-)	1.31584	1.62209	2.39174	not detected	0.260153	0.0481992	0.149332	NA
520.22	8.15694	C21H36N4O9S	Glu-Glu-Ile-Met	Level 2	Peptide(tetra-)	1.64723	1.12254	2.93245	not detected	0.0903506	0.197283	0.167144	NA
503.216	11.9746	C19H33N7O7S	Glu-Cys-Pro-Arg	Level 2	Peptide(tetra-)	1.08489	1.30365	1.90232	not detected	0.153427	0.170203	0.233113	NA
399.212	9.84528	C17H29N5O6	Ala-Val-Asn-Pro	Level 2	Peptide(tetra-)	1.46787	1.48355	2.51838	0.560428	0.159468	0.0473771	0.160463	0.32444
530.249	8.38998	C25H34N6O7	Gln-Thr-Trp-Pro	Level 2	Peptide(tetra-)	4.5937	1.26607	7.76354	0.735795	0.259293	0.139744	0.0331524	0.160038
388.196	10.8393	C16H28N4O7	Ala-Glu-Gly-Ile	Level 2	Peptide(tetra-)	267.009	not detected	450.532	not detected	0.31192	NA	0.218834	NA
429.222	14.7375	C18H31N5O7	Ala-Lys-Asp-Pro	Level 2	Peptide(tetra-)	1.95321	1.41243	3.26408	0.835958	0.124527	0.097436	0.0693224	0.069913
473.212	14.7483	C19H31N5O9	Asp-Lys-Asp-Pro	Level 2	Peptide(tetra-)	1.8986	1.36517	3.08875	0.856492	0.269964	0.0369218	0.0823197	0.136172
458.286	12.6351	C20H38N6O6	Ala-Leu-Lys-Gln	Level 2	Peptide(tetra-)	163.521	not detected	261.456	not detected	0.266069	NA	0.0712989	NA
501.243	16.3332	C21H35N5O9	Glu-Glu-Lys-Pro	Level 2	Peptide(tetra-)	2.23806	1.32849	3.56109	0.824844	0.279709	0.0658241	0.163961	0.0668452
428.263	7.09136	C20H36N4O6	Ile-Ile-Pro-Ser	Level 2	Peptide(tetra-)	3.10229	1.49272	4.8938	not detected	0.232226	0.278776	0.0587735	NA
328.175	10.0707	C14H24N4O5	Ala-Ala-Ala-Pro	Level 2	Peptide(tetra-)	0.781114	1.38254	1.20577	0.499408	0.226531	0.159185	0.210762	0.136271
332.169	14.7309	C13H24N4O6	Ala-Thr-Ala-Ala	Level 2	Peptide(tetra-)	2.00771	1.3248	3.09188	1.02661	0.233205	0.0298297	0.200682	0.319318
468.169	9.67263	C20H28N4O7S	Asp-Met-Phe-Gly	Level 2	Peptide(tetra-)	90.5938	not detected	137.257	not detected	0.252715	NA	0.0635818	NA
505.217	12.3978	C23H31N5O8	Asp-Phe-Gln-Pro	Level 2	Peptide(tetra-)	3.41696	1.58143	5.16374	0.582549	0.270066	0.196165	0.105999	0.188932
440.202	12.3624	C18H28N6O7	Ala-Val-Asp-His	Level 2	Peptide(tetra-)	3.40175	2.41681	5.11085	not detected	0.229118	0.384468	0.0948096	NA
486.142	16.5032	C19H26N4O9S	Asp-Cys-Ser-Tyr	Level 2	Peptide(tetra-)	2.84616	1.18293	4.22484	4.28151	0.2709	0.225615	0.355036	0.321021
422.11	16.0135	C14H22N4O9S	Ala-Asp-Asp-Cys	Level 2	Peptide(tetra-)	1.69315	1.60966	2.47448	2.18398	0.227093	0.679844	0.170001	0.364247
439.243	8.74126	C20H33N5O6	Gln-Val-Pro-Pro	Level 2	Peptide(tetra-)	1.69959	1.61727	2.44598	not detected	0.307856	0.140206	0.119218	NA
473.176	16.1537	C18H27N5O10	Asp-Asp-Gln-Pro	Level 2	Peptide(tetra-)	1.71392	1.49382	2.45566	1.09438	0.153851	0.196751	0.128318	0.192561
488.235	17.2055	C18H32N8O8	Ala-Asp-Gln-Arg	Level 2	Peptide(tetra-)	5.5815	1.46152	7.90157	1.94728	0.239267	0.278096	0.14309	0.312709
462.212	11.1018	C22H30N4O7	Glu-Phe-Ala-Pro	Level 2	Peptide(tetra-)	2.6461	1.21725	3.74186	0.809528	0.0701101	0.234595	0.0278389	0.243893
506.206	10.7791	C20H34N4O9S	Asp-Glu-Ile-Met	Level 2	Peptide(tetra-)	5.77554	2.07645	8.15252	not detected	0.237999	0.386211	0.0798055	NA
463.255	10.8643	C21H33N7O5	Ala-Phe-Ala-Arg	Level 2	Peptide(tetra-)	7.00525	1.52961	9.81187	1.36616	0.0935492	0.121662	0.136069	0.0120786
472.301	11.6216	C21H40N6O6	Asn-Leu-Lys-Val	Level 2	Peptide(tetra-)	259.39	13.9445	360	2.10381	0.173766	NA	0.0959755	0.0461784
438.175	11.3581	C19H26N4O8	Ala-Ala-Asp-Tyr	Level 2	Peptide(tetra-)	1.47469	1.25357	2.04567	1.79913	0.19746	0.0130279	0.115753	0.212657
384.201	15.6128	C17H28N4O6	Ala-Thr-Pro-Pro	Level 2	Peptide(tetra-)	472.779	not detected	655.202	not detected	0.359849	NA	0.149815	NA
509.249	12.311	C23H35N5O8	Asn-Leu-Thr-Tyr	Level 2	Peptide(tetra-)	9.14726	1.81234	12.624	2.36979	0.267738	0.240955	0.179187	0.0785309
443.239	9.69447	C19H33N5O7	Asn-Leu-Thr-Pro	Level 2	Peptide(tetra-)	4.31025	2.35563	5.82684	not detected	0.211682	0.0316815	0.178413	NA
416.19	10.1746	C17H28N4O8	Asp-Val-Pro-Ser	Level 2	Peptide(tetra-)	1.4089	1.21919	1.88293	1.84177	0.0495448	0.183405	0.0683908	0.266845
360.165	12.3081	C14H24N4O7	Ala-Pro-Ser-Ser	Level 2	Peptide(tetra-)	1.592	0.979387	2.12358	1.60259	0.168063	0.0841457	0.157912	0.318023
426.248	13.0977	C20H34N4O6	Ile-Thr-Pro-Pro	Level 2	Peptide(tetra-)	124.689	not detected	166.132	not detected	0.573884	NA	0.24091	NA
432.186	10.6732	C17H28N4O9	Ala-Leu-Asp-Asp	Level 2	Peptide(tetra-)	1.39234	1.28719	1.82923	2.03974	0.396321	0.182469	0.282591	0.21621
417.223	14.0985	C17H31N5O7	Ala-Leu-Gln-Ser	Level 2	Peptide(tetra-)	11.9179	1.16783	15.3511	not detected	0.410263	0.870938	0.186581	NA
488.259	13.233	C20H36N6O8	Asn-Leu-Lys-Asp	Level 2	Peptide(tetra-)	2.03947	1.18744	2.62299	1.48267	0.328828	0.287431	0.17909	0.304886
414.247	7.08007	C19H34N4O6	Ile-Val-Pro-Ser	Level 2	Peptide(tetra-)	1.39731	1.36948	1.79181	not detected	0.225537	0.276875	0.158082	NA
716.295	10.5256	C40H40N6O7	Trp-Trp-Tyr-Tyr	Level 2	Peptide(tetra-)	1.83359	0.96465	2.3504	1.62394	0.202722	0.070086	0.108471	0.156869
477.218	17.2292	C17H31N7O9	Arg-Thr-Asp-Ser	Level 2	Peptide(tetra-)	1.01789	0.92015	1.28493	1.84149	0.247796	0.0280407	0.105817	0.202249
456.258	9.81393	C21H36N4O7	Asp-Ile-Ile-Pro	Level 2	Peptide(tetra-)	139.231	25.8206	175.472	not detected	0.171383	0.873548	0.0583511	NA
457.21	12.0655	C18H31N7O5S	Ala-Lys-Cys-His	Level 2	Peptide(tetra-)	1.78867	1.13573	2.23286	not detected	0.256203	0.0472416	0.15185	NA
388.231	13.567	C17H32N4O6	Ala-Thr-Val-Val	Level 2	Peptide(tetra-)	11.9275	1.9636	14.8239	not detected	0.365653	0.161895	0.0699951	NA
376.196	8.63978	C15H28N4O7	Ala-Leu-Ser-Ser	Level 2	Peptide(tetra-)	2.40757	1.3527	2.93812	not detected	0.225337	0.306068	0.132917	NA
356.206	13.0145	C16H28N4O5	Ala-Leu-Gly-Pro	Level 2	Peptide(tetra-)	2.21621	0.863278	2.69795	2.25412	0.311289	0.449891	0.137058	0.40311
512.143	15.1098	C18H32N4O7S3	Glu-Met-Met-Cys	Level 2	Peptide(tetra-)	95.5073	not detected	115.56	not detected	0.0700119	NA	0.0939119	NA
437.195	11.9616	C16H31N5O7S	Cys-Lys-Thr-Ser	Level 2	Peptide(tetra-)	1.98496	0.996014	2.38768	not detected	0.258207	0.0402574	0.19876	NA
471.233	7.74501	C20H33N5O8	Asn-Glu-Ile-Pro	Level 2	Peptide(tetra-)	1.61078	1.13229	1.91409	1.42288	0.268357	0.24753	0.0208313	0.307957
361.16	13.4962	C13H23N5O7	Ala-Ala-Asn-Ser	Level 2	Peptide(tetra-)	2.62884	1.59848	3.07905	1.87799	0.273856	0.087003	0.126822	0.161784
458.26	13.4119	C18H34N8O6	Ala-Val-Asn-Arg	Level 2	Peptide(tetra-)	117.888	not detected	138.054	not detected	0.267962	NA	0.144078	NA
362.18	15.5925	C14H26N4O7	Ala-Thr-Thr-Ala	Level 2	Peptide(tetra-)	2.20304	1.1668	2.57451	2.39479	0.251703	0.121626	0.0850721	0.150979
466.218	11.8186	C20H30N6O7	Asp-Val-Pro-His	Level 2	Peptide(tetra-)	1.45985	1.52046	1.69408	not detected	0.0272765	0.235194	0.025099	NA
514.217	11.5862	C24H30N6O7	Asp-Phe-Pro-His	Level 2	Peptide(tetra-)	1.80475	1.04966	2.09235	0.674644	0.125903	0.122168	0.0861521	0.275299
374.191	16.6931	C14H26N6O6	Asn-Lys-Gly-Gly	Level 2	Peptide(tetra-)	6.69877	1.22539	7.69173	1.65268	0.168667	0.0605011	0.137728	0.0815411
346.149	13.55	C13H22N4O7	Ala-Ala-Ala-Asp	Level 2	Peptide(tetra-)	2.09376	1.27444	2.35632	not detected	0.0137593	0.154118	0.141576	NA
530.318	11.9644	C22H42N8O7	Arg-Leu-Lys-Asp	Level 2	Peptide(tetra-)	12.0036	1.63028	13.4904	1.80649	0.214924	0.142193	0.269027	0.096844
445.254	13.3444	C19H35N5O7	Ala-Leu-Lys-Asp	Level 2	Peptide(tetra-)	2.21265	1.1832	2.48073	2.10022	0.255993	0.072801	0.185687	0.256581
541.213	15.9686	C21H31N7O10	Glu-Glu-Gln-His	Level 2	Peptide(tetra-)	2.61509	1.40064	2.89243	0.906132	0.152413	0.0963087	0.0725003	0.158308
550.312	16.6423	C26H42N6O7	Glu-Lys-Lys-Phe	Level 2	Peptide(tetra-)	0.75117	1.03044	0.829022	not detected	0.10895	0.0904173	0.0517626	NA
449.141	14.8425	C16H27N5O6S2	Cys-Cys-Gln-Pro	Level 2	Peptide(tetra-)	1.41867	1.28371	1.55867	not detected	0.119305	0.116111	0.218633	NA
441.259	7.98499	C20H35N5O6	Asn-Leu-Val-Pro	Level 2	Peptide(tetra-)	1.90488	1.22751	2.09105	1.99406	0.25666	0.153732	0.122692	0.321198
389.191	16.0482	C15H27N5O7	Ala-Lys-Asp-Gly	Level 2	Peptide(tetra-)	2.04399	0.988093	2.2425	1.82333	0.226448	0.109506	0.163829	0.275439
495.197	12.7583	C21H29N5O9	Ala-Asp-Gln-Tyr	Level 2	Peptide(tetra-)	234.389	12.1539	257.076	1.16311	0.286539	NA	0.115154	0.120067
390.175	17.2926	C15H26N4O8	Asp-Leu-Gly-Ser	Level 2	Peptide(tetra-)	1.4719	0.987163	1.60792	not detected	0.275471	0.0726736	0.371335	NA
431.202	12.1876	C17H29N5O8	Ala-Leu-Asn-Asp	Level 2	Peptide(tetra-)	10.2053	1.21449	11.1386	not detected	0.154417	0.873242	0.0991312	NA
318.154	17.8462	C12H22N4O6	Ala-Thr-Ala-Gly	Level 2	Peptide(tetra-)	1.07833	1.02111	1.17617	1.41742	0.177841	0.0971577	0.24438	0.230048
403.207	15.0617	C16H29N5O7	Ala-Leu-Asn-Ser	Level 2	Peptide(tetra-)	1.6819	1.17799	1.80054	1.74016	0.259499	0.104224	0.211775	0.158727
438.186	14.2404	C18H26N6O7	Ala-Asp-Pro-His	Level 2	Peptide(tetra-)	2.13619	1.59778	2.27861	1.90385	0.343508	0.294497	0.173622	0.404952
487.275	13.9573	C20H37N7O7	Ala-Glu-Arg-Ile	Level 2	Peptide(tetra-)	206.844	24.7119	219.799	not detected	0.248411	0.876168	0.142628	NA
510.207	14.1095	C21H30N6O9	Asn-Gln-Ser-Tyr	Level 2	Peptide(tetra-)	1.17691	1.30113	1.24765	0.419991	0.0295839	0.494703	0.18673	0.882966
394.116	17.1663	C13H22N4O8S	Ala-Asp-Cys-Ser	Level 2	Peptide(tetra-)	1.45114	1.17174	1.53401	2.02594	0.137102	0.022715	0.100533	0.22876
418.207	8.01717	C17H30N4O8	Ala-Glu-Ile-Ser	Level 2	Peptide(tetra-)	1.70611	0.929394	1.7922	0.946727	0.331919	0.088965	0.123847	0.0824482
360.201	13.9121	C15H28N4O6	Ala-Leu-Ala-Ser	Level 2	Peptide(tetra-)	2.45415	1.1246	2.56034	not detected	0.272979	0.485996	0.221075	NA
417.197	15.7763	C15H27N7O7	Ala-Asp-Gly-Arg	Level 2	Peptide(tetra-)	3.07817	1.35471	3.2058	2.10311	0.28179	0.246517	0.31479	0.294851
456.161	15.6726	C17H24N6O9	Ala-Asp-Asp-His	Level 2	Peptide(tetra-)	1.28156	1.04352	1.33274	not detected	0.572073	0.399261	0.374716	NA
423.179	11.9688	C15H29N5O7S	Cys-Lys-Ser-Ser	Level 2	Peptide(tetra-)	0.714306	0.962659	0.742338	not detected	0.237191	0.0258313	0.0226265	NA
390.175	12.5358	C15H26N4O8	Ala-Val-Asp-Ser	Level 2	Peptide(tetra-)	6.292	1.60332	6.35014	0.77325	0.285937	0.37477	0.141003	0.177229
400.196	12.61	C17H28N4O7	Ala-Val-Asp-Pro	Level 2	Peptide(tetra-)	2.41123	1.33458	2.38981	not detected	0.247513	0.10968	0.140411	NA
484.192	15.3961	C19H28N6O9	Ala-Glu-Glu-His	Level 2	Peptide(tetra-)	1.20947	1.39076	1.18996	0.889635	0.0192803	0.220101	0.106447	0.161206
457.218	9.49803	C19H31N5O8	Asn-Leu-Asp-Pro	Level 2	Peptide(tetra-)	3.99655	1.37069	3.92607	not detected	0.200636	0.0897173	0.0849807	NA
461.187	17.844	C16H27N7O9	Asn-Asn-Gln-Ser	Level 2	Peptide(tetra-)	1.08616	1.02582	1.06175	1.25467	0.207884	0.066396	0.193129	0.249028
517.239	13.4428	C21H35N5O10	Glu-Glu-Gln-Ile	Level 2	Peptide(tetra-)	3.77207	1.1509	3.61439	0.577226	0.109047	0.205022	0.168817	0.100908
374.216	18.7438	C16H30N4O6	Ala-Val-Val-Ser	Level 2	Peptide(tetra-)	1.49529	1.05355	1.41627	1.51123	0.235959	0.131957	0.161953	0.210117
429.186	14.3466	C17H27N5O8	Ala-Asp-Gln-Pro	Level 2	Peptide(tetra-)	4.5771	1.90844	4.32897	2.07797	0.287844	0.149427	0.200626	0.157795
376.159	17.175	C14H24N4O8	Asp-Val-Gly-Ser	Level 2	Peptide(tetra-)	1.4315	1.06519	1.34843	1.67262	0.0860427	0.156706	0.112156	0.263546
426.088	16.8706	C13H22N4O8S2	Asp-Cys-Cys-Ser	Level 2	Peptide(tetra-)	1.29918	0.740376	1.21801	1.45248	0.752972	0.476381	0.446033	0.39926
497.248	14.7098	C22H35N5O8	Lys-Thr-Ser-Tyr	Level 2	Peptide(tetra-)	1.45211	1.09467	1.3541	2.03956	0.257732	0.0339068	0.25471	0.259518
374.216	14.4625	C16H30N4O6	Ala-Leu-Thr-Ala	Level 2	Peptide(tetra-)	1.81905	1.26584	1.6855	1.77125	0.177319	0.0768602	0.145977	0.16681
318.154	16.109	C12H22N4O6	Ala-Ala-Ala-Ser	Level 2	Peptide(tetra-)	1.2082	0.900193	1.11858	1.66863	0.290517	0.107615	0.154852	0.0968604
439.254	12.9563	C19H33N7O5	Ala-Pro-Pro-Arg	Level 2	Peptide(tetra-)	1.80346	1.26285	1.66593	1.05202	0.361566	0.102996	0.0902498	0.140596
460.192	15.5875	C17H28N6O9	Ala-Asp-Gln-Gln	Level 2	Peptide(tetra-)	1.88744	1.16173	1.73045	1.14984	0.224176	0.111476	0.0521673	0.242664
375.175	16.3497	C14H25N5O7	Ala-Ala-Gln-Ser	Level 2	Peptide(tetra-)	1.59447	1.01715	1.43942	1.29706	0.184246	0.152531	0.223176	0.137918
498.179	10.0224	C21H30N4O8S	Ala-Met-Asp-Tyr	Level 2	Peptide(tetra-)	0.719495	0.924008	0.647995	not detected	0.26858	0.0598814	0.135836	NA
498.179	10.8095	C21H30N4O8S	Asp-Met-Phe-Ser	Level 2	Peptide(tetra-)	0.80217	0.919904	0.716689	not detected	0.190693	0.0855685	0.0546523	NA
358.149	15.4333	C14H22N4O7	Ala-Asp-Gly-Pro	Level 2	Peptide(tetra-)	1.54499	1.52113	1.37583	1.43054	0.300023	0.0606649	0.0401378	0.0968982
404.19	14.9746	C16H28N4O8	Ala-Leu-Asp-Ser	Level 2	Peptide(tetra-)	1.11854	0.985941	0.995204	1.15934	0.294658	0.191566	0.0460731	0.193488
502.239	11.8466	C20H34N6O9	Asn-Glu-Gln-Ile	Level 2	Peptide(tetra-)	254.544	not detected	224.861	not detected	0.3967	NA	0.135563	NA
413.227	9.50662	C18H31N5O6	Ala-Leu-Asn-Pro	Level 2	Peptide(tetra-)	4.31464	1.16299	3.75624	0.954514	0.135584	0.088534	0.113428	0.364537
461.187	17.0273	C16H27N7O9	Arg-Asp-Asp-Gly	Level 2	Peptide(tetra-)	1.17369	1.1161	1.00022	1.49564	0.123783	0.193629	0.211021	0.260713
433.199	13.0688	C17H31N5O6S	Ala-Leu-Cys-Gln	Level 2	Peptide(tetra-)	12.0957	1.38768	10.227	1.60916	0.529492	0.900188	0.159988	0.0967143
455.213	15.55	C18H29N7O7	Ala-Thr-Gln-His	Level 2	Peptide(tetra-)	1.88217	1.21344	1.57321	not detected	0.382029	0.31559	0.235815	NA
500.177	10.0424	C21H32N4O6S2	Cys-Leu-Cys-Tyr	Level 2	Peptide(tetra-)	0.975819	1.11876	0.809056	not detected	0.201347	0.157492	0.0918316	NA
482.22	10.8234	C22H34N4O6S	Ala-Met-Val-Tyr	Level 2	Peptide(tetra-)	191.175	not detected	157.881	not detected	0.247056	NA	0.0626432	NA
359.217	14.1169	C15H29N5O5	Ala-Lys-Ala-Ala	Level 2	Peptide(tetra-)	7.31799	1.10801	5.9547	1.22413	0.356842	0.271998	0.137224	0.276551
445.217	11.8648	C18H31N5O8	Ala-Glu-Asn-Ile	Level 2	Peptide(tetra-)	15.0158	1.78586	12.1207	1.22531	0.254518	0.29082	0.0130775	0.221612
376.159	16.778	C14H24N4O8	Ala-Thr-Ala-Asp	Level 2	Peptide(tetra-)	1.62884	1.11445	1.31125	1.82857	0.225731	0.140808	0.152861	0.222025
500.177	10.6811	C21H32N4O6S2	Cys-Met-Phe-Thr	Level 2	Peptide(tetra-)	0.914457	1.04004	0.735036	not detected	0.126782	0.0814826	0.0375286	NA
424.16	14.2585	C18H24N4O8	Ala-Asp-Gly-Tyr	Level 2	Peptide(tetra-)	6.27689	1.1924	4.99676	1.37312	0.317525	0.137421	0.108596	0.252515
489.243	14.189	C20H35N5O9	Asp-Leu-Lys-Asp	Level 2	Peptide(tetra-)	1.08273	0.799141	0.855954	1.72915	0.202974	0.12804	0.134725	0.1296
388.232	11.6566	C17H32N4O6	Ala-Leu-Val-Ser	Level 2	Peptide(tetra-)	295.282	10.1576	230.393	not detected	0.264905	NA	0.216824	NA
519.233	7.23788	C24H33N5O8	Asp-Leu-Trp-Ser	Level 2	Peptide(tetra-)	3.37378	1.18455	2.59024	not detected	0.25324	0.127899	0.121251	NA
474.281	12.8446	C20H38N6O7	Asn-Leu-Lys-Thr	Level 2	Peptide(tetra-)	302.341	not detected	219.288	not detected	0.263568	NA	0.179253	NA
488.259	13.7666	C20H36N6O8	Asp-Lys-Val-Gln	Level 2	Peptide(tetra-)	2.42392	1.10197	1.67212	not detected	0.280518	0.477087	0.227676	NA
432.16	13.065	C15H24N6O9	Ala-Asn-Asn-Asp	Level 2	Peptide(tetra-)	1.19278	0.981006	0.815348	1.62177	0.349146	0.367376	0.167601	0.309513
486.28	13.0788	C21H38N6O7	Asn-Ile-Gln-Ile	Level 2	Peptide(tetra-)	29.9995	2.40849	20.1199	not detected	0.582359	0.887213	0.143667	NA
475.192	15.8133	C18H29N5O10	Ala-Glu-Gln-Glu	Level 2	Peptide(tetra-)	1.90497	0.821667	1.24003	1.06047	0.37957	0.372007	0.117179	0.231448
414.223	15.4468	C17H30N6O6	Asn-Lys-Gly-Pro	Level 2	Peptide(tetra-)	5.0119	1.46548	3.10228	1.44588	0.351203	0.0165196	0.0970991	0.114631
555.229	12.5229	C23H37N7O5S2	Arg-Met-Phe-Cys	Level 2	Peptide(tetra-)	2.03583	1.18304	1.23827	1.27834	0.240624	0.0476566	0.145121	0.344227
460.264	14.1754	C19H36N6O7	Ala-Lys-Lys-Asp	Level 2	Peptide(tetra-)	7.17221	0.986388	4.16892	1.50394	0.353948	0.42192	0.0831426	0.135155
362.126	14.77	C13H22N4O6S	Cys-Gly-Pro-Ser	Level 2	Peptide(tetra-)	1.43629	0.948342	0.808136	not detected	0.499274	0.155785	0.0807722	NA
439.243	10.8194	C20H33N5O6	Asn-Leu-Pro-Pro	Level 2	Peptide(tetra-)	16.9705	1.55774	9.41144	0.777131	0.312448	0.201759	0.0845422	0.234127
436.126	15.7862	C15H24N4O9S	Cys-Glu-Glu-Gly	Level 2	Peptide(tetra-)	3.59809	1.07507	1.88373	not detected	0.295782	0.0764323	0.10528	NA
386.18	9.73206	C16H26N4O7	Asp-Val-Gly-Pro	Level 2	Peptide(tetra-)	1.92446	1.38642	0.895386	not detected	0.312266	0.20794	0.12584	NA
470.134	16.2689	C16H30N4O6S3	Cys-Met-Met-Ser	Level 2	Peptide(tetra-)	761.034	not detected	344.759	not detected	0.235988	NA	0.167269	NA
376.142	14.6602	C14H24N4O6S	Ala-Cys-Pro-Ser	Level 2	Peptide(tetra-)	1.3255	0.970478	0.589524	not detected	0.32532	0.229862	0.226673	NA
378.191	7.1319	C18H26N4O5	Ala-Phe-Ala-Ala	Level 2	Peptide(tetra-)	2.00338	1.04607	0.877094	not detected	0.324065	0.181514	0.176113	NA
342.19	9.74126	C15H26N4O5	Ala-Val-Gly-Pro	Level 2	Peptide(tetra-)	1.89048	1.30934	0.809783	0.526459	0.329942	0.111213	0.105147	0.303376
440.176	14.7523	C16H24N8O7	Asn-Asn-Gly-His	Level 2	Peptide(tetra-)	1.11075	0.841555	0.454943	not detected	0.493065	0.138446	0.307585	NA
379.116	12.5324	C12H21N5O7S	Asn-Cys-Gly-Ser	Level 2	Peptide(tetra-)	1.67453	0.940879	0.186938	not detected	0.390715	0.265315	NA	NA
511.192	14.8925	C21H29N5O10	Asn-Thr-Asp-Tyr	Level 2	Peptide(tetra-)	0.850205	0.864142	not detected	not detected	0.316223	0.162524	NA	NA
218.127	14.3283	C9H18N2O4	Leu-Ser	Level 2	Peptide(di-)	0.897536	0.842886	5.19635	10.3904	0.892708	0.869516	0.209366	0.0914421
247.08	15.6201	C8H13N3O6	Asn-Asp	Level 2	Peptide(di-)	1.59347	1.23892	4.18975	1.13765	0.334938	0.414551	0.304915	0.127132
248.101	14.6454	C9H16N2O6	Glu-Thr	Level 2	Peptide(di-)	2.32752	1.14215	5.46786	7.77139	0.224249	0.0516706	0.181017	0.195822
246.096	13.7747	C8H14N4O5	Asn-Asn	Level 2	Peptide(di-)	2.27511	1.20661	5.17637	0.852523	0.0150518	0.160427	0.208949	0.125526
172.085	12.5139	C7H12N2O3	Glycylproline	Level 2	Peptide(di-)	3.41937	1.55015	7.56449	0.824627	0.31864	0.10611	0.381095	0.042709
247.153	15.6474	C10H21N3O4	Lys-Thr	Level 2	Peptide(di-)	2.83649	1.44973	6.22427	1.11984	0.516169	0.541803	0.465934	0.259411
260.148	16.46	C10H20N4O4	Lys-Asn	Level 2	Peptide(di-)	3.68661	1.60717	8.0524	0.901008	0.0747768	0.0911023	0.162251	0.216075
289.139	16.7389	C10H19N5O5	Asp-Arg	Level 2	Peptide(di-)	2.17713	1.13877	4.73544	1.84769	0.0889255	0.162945	0.206173	0.140449
303.154	16.648	C11H21N5O5	Glu-Arg	Level 2	Peptide(di-)	3.24815	1.53672	6.53769	4.03785	0.0331661	0.221821	0.116324	0.308573
252.122	12.2039	C11H16N4O3	Pro-His	Level 2	Peptide(di-)	1.1209	1.47602	2.2031	0.551846	0.0758409	0.20201	0.0843242	0.145162
271.164	15.1743	C11H21N5O3	Pro-Arg	Level 2	Peptide(di-)	2.20164	1.38246	4.29374	1.1437	0.113376	0.173993	0.217577	0.089524
341.149	8.97624	C17H19N5O3	Trp-His	Level 2	Peptide(di-)	1.61124	1.36051	3.1334	not detected	0.0718193	0.196537	0.00297761	NA
189.075	12.961	C6H11N3O4	Asn-Gly	Level 2	Peptide(di-)	2.25177	1.25315	4.17791	not detected	0.129584	0.0917908	0.0608223	NA
243.158	15.1555	C11H21N3O3	Lys-Pro	Level 2	Peptide(di-)	1.51547	1.36744	2.69043	1.18062	0.100447	0.231653	0.161759	0.11528
280.106	11.131	C13H16N2O5	Phe-Asp	Level 2	Peptide(di-)	1.22476	1.31657	2.15631	0.49902	0.1355	0.0878522	0.0756672	0.0177737
283.128	12.5899	C11H17N5O4	Gln-His	Level 2	Peptide(di-)	2.89954	1.34822	4.87504	not detected	0.0411492	0.0539318	0.0552651	NA
186.1	11.4013	C8H14N2O3	Ala-Pro	Level 2	Peptide(di-)	1.46267	1.23161	2.45176	0.888811	0.240138	0.231441	0.09777	0.0755236
162.064	12.9439	C5H10N2O4	Gly-Ser	Level 2	Peptide(di-)	3.58365	1.2052	5.99773	not detected	0.176	0.21775	0.121594	NA
295.117	10.9629	C13H17N3O5	Asn-Tyr	Level 2	Peptide(di-)	3.77242	1.4161	6.15038	0.8464	0.0835467	0.00782095	0.0782825	0.114577
231.133	16.8198	C8H17N5O3	Gly-Arg	Level 2	Peptide(di-)	3.8362	1.41917	6.16982	1.04619	0.107391	0.169574	0.134143	0.110229
230.09	15.3352	C9H14N2O5	Aspartyl-L-proline	Level 2	Peptide(di-)	2.36511	1.15815	3.74115	1.66193	0.162629	0.0648296	0.112533	0.0605103
229.106	13.1998	C9H15N3O4	Asn-Pro	Level 2	Peptide(di-)	2.30647	1.28808	3.64547	0.809375	0.123891	0.0859377	0.128874	0.134805
311.17	16.0419	C12H21N7O3	Arg-His	Level 2	Peptide(di-)	3.33175	1.20164	5.22811	0.900449	0.161412	0.119833	0.174571	0.306627
275.148	16.7779	C11H21N3O5	L-a-glutamyl-L-Lysine	Level 2	Peptide(di-)	1.96791	1.22765	3.05193	1.34296	0.0485271	0.129121	0.18514	0.077
259.19	12.5556	C12H25N3O3	Ile-Lys	Level 2	Peptide(di-)	4.73839	1.62464	7.25672	0.823764	0.108771	0.185157	0.250264	0.125357
206.073	10.023	C7H14N2O3S	Met-Gly	Level 2	Peptide(di-)	154.713	not detected	223.991	not detected	0.111972	NA	0.105082	NA
203.127	16.5754	C8H17N3O3	Lys-Gly	Level 2	Peptide(di-)	1.67928	1.44013	2.42254	0.757645	0.133263	0.0702901	0.132849	0.0516367
203.091	12.9168	C7H13N3O4	Ala-Asn	Level 2	Peptide(di-)	5.91429	1.3422	8.24282	1.10055	0.306262	0.124096	0.268778	0.147075
233.137	16.5352	C9H19N3O4	Lys-Ser	Level 2	Peptide(di-)	4.06713	1.35469	5.4091	1.07811	0.258313	0.0397995	0.200176	0.0270195
288.155	16.3824	C10H20N6O4	Asn-Arg	Level 2	Peptide(di-)	5.99216	1.50018	7.96101	1.05698	0.105961	0.0580324	0.123257	0.102175
283.164	16.0452	C12H21N5O3	Lys-His	Level 2	Peptide(di-)	2.17914	1.18068	2.89414	0.826929	0.0944606	0.0942487	0.11215	0.0537262
246.122	11.3678	C10H18N2O5	Ile-Asp	Level 2	Peptide(di-)	0.817139	1.08123	1.08149	not detected	0.259663	0.215148	0.210365	NA
275.16	15.5856	C10H21N5O4	Thr-Arg	Level 2	Peptide(di-)	7.15934	1.62393	9.14902	1.5562	0.276204	0.05778	0.122243	0.272411
236.083	10.4874	C8H16N2O4S	Met-Ser	Level 2	Peptide(di-)	1.11303	0.949425	1.39672	1.43527	0.255034	0.267296	0.294383	0.107376
273.18	13.4728	C11H23N5O3	Val-Arg	Level 2	Peptide(di-)	5.26396	1.31782	6.54795	1.09561	0.138636	0.149864	0.103557	0.186795
176.08	11.8609	C6H12N2O4	Ala-Ser	Level 2	Peptide(di-)	1.80627	1.09526	2.24454	not detected	0.204171	0.127926	0.142791	NA
192.075	13.186	C6H12N2O5	Ser-Ser	Level 2	Peptide(di-)	5.37205	1.38846	6.64204	0.925198	0.110344	0.482625	0.140406	0.176592
268.153	8.17911	C12H20N4O3	His-Leu	Level 2	Peptide(di-)	2.04625	1.00902	2.46102	1.25309	0.148341	0.0206201	0.101105	0.291399
188.116	12.7831	C8H16N2O3	Glycyl-leucine	Level 2	Peptide(di-)	8.5576	1.20747	10.0497	not detected	0.245259	0.185102	0.232305	NA
219.085	13.5666	C7H13N3O5	Asn-Ser	Level 2	Peptide(di-)	5.43014	1.3922	6.35821	1.03275	0.119476	0.0297802	0.139252	0.0151619
279.122	8.13532	C13H17N3O4	Phe-Asn	Level 2	Peptide(di-)	1.99956	1.29798	2.33033	0.384725	0.0947173	0.145005	0.0940592	0.0647609
228.147	7.33962	C11H20N2O3	Ile-Pro	Level 2	Peptide(di-)	2.00989	1.27358	2.33754	not detected	0.543345	0.275281	0.117919	NA
245.138	9.63724	C10H19N3O4	Leu-Asn	Level 2	Peptide(di-)	2.18395	1.34808	2.49608	not detected	0.189031	0.171978	0.158026	NA
268.105	10.9471	C12H16N2O5	Ser-Tyr	Level 2	Peptide(di-)	1.93514	0.93831	2.19428	not detected	0.0498236	0.290322	0.212851	NA
245.174	13.6565	C11H23N3O3	Lys-Val	Level 2	Peptide(di-)	1.62747	1.2924	1.79468	1.608	0.130935	0.101892	0.0719415	0.0959745
245.138	9.13839	C10H19N3O4	Ile-Asn	Level 2	Peptide(di-)	3.1413	1.24921	3.44951	0.606896	0.205882	0.120834	0.120616	0.262524
220.088	10.4915	C8H16N2O3S	Met-Ala	Level 2	Peptide(di-)	1.60553	1.3687	1.74611	not detected	0.145031	0.147131	0.0992533	NA
232.142	7.33023	C10H20N2O4	Ile-Thr	Level 2	Peptide(di-)	3.89724	1.45739	4.18219	14.7364	0.139771	0.140189	0.139202	0.86632
176.08	12.3229	C6H12N2O4	Thr-Gly	Level 2	Peptide(di-)	3.5408	1.01598	3.79739	not detected	0.200673	0.0227799	0.191919	NA
287.196	12.3973	C12H25N5O3	Ile-Arg	Level 2	Peptide(di-)	6.04705	1.56069	6.44225	1.1595	0.223539	0.106174	0.0511565	0.152371
228.147	10.0286	C11H20N2O3	Leu-Pro	Level 2	Peptide(di-)	1.35604	1.07806	1.44318	2.04111	0.52139	0.187713	0.164884	0.115312
214.132	8.40124	C10H18N2O3	Val-Pro	Level 2	Peptide(di-)	0.912414	1.35789	0.957981	not detected	0.0759054	0.0369901	0.533376	NA
202.132	7.12368	C9H18N2O3	Ile-Ala	Level 2	Peptide(di-)	1.8625	1.14159	1.93878	1.34877	0.270014	0.139836	0.108737	0.0997509
246.122	11.9528	C10H18N2O5	Glu-Val	Level 2	Peptide(di-)	2.32974	1.44359	2.37012	not detected	0.208249	0.0711259	0.103583	NA
275.127	8.30946	C14H17N3O3	Trp-Ala	Level 2	Peptide(di-)	2.95225	1.24001	2.98748	not detected	0.206485	0.0991265	0.038517	NA
293.174	11.7981	C15H23N3O3	Lys-Phe	Level 2	Peptide(di-)	4.2283	1.49216	4.22603	1.0608	0.212543	0.246447	0.082608	0.0341975
266.127	7.11213	C13H18N2O4	Phe-Thr	Level 2	Peptide(di-)	2.31034	1.06115	2.27192	not detected	0.116275	0.102534	0.116896	NA
230.163	7.06559	C11H22N2O3	Ile-Val	Level 2	Peptide(di-)	1.88186	1.2603	1.78456	not detected	0.279885	0.373034	0.18867	NA
216.147	7.09149	C10H20N2O3	Val-Val	Level 2	Peptide(di-)	1.2456	1.29785	1.17146	0.46865	0.169704	0.274594	0.0428936	0.866026
291.122	9.45231	C14H17N3O4	Trp-Ser	Level 2	Peptide(di-)	7.69744	1.51721	7.20837	not detected	0.128136	0.0322387	0.0950767	NA
309.168	14.2532	C15H23N3O4	Lys-Tyr	Level 2	Peptide(di-)	5.40399	1.21314	4.9515	1.50711	0.21803	0.280448	0.113185	0.136365
261.111	8.41263	C13H15N3O3	Trp-Gly	Level 2	Peptide(di-)	0.973944	0.961996	0.887885	not detected	0.229771	0.125891	0.115176	NA
218.127	8.31861	C9H18N2O4	Ile-Ser	Level 2	Peptide(di-)	1.90884	1.15177	1.73458	0.709938	0.238462	0.0412005	0.192167	0.319535
261.144	16.4375	C9H19N5O4	Ser-Arg	Level 2	Peptide(di-)	7.63349	1.22316	6.66033	1.36377	0.25747	0.0184387	0.0417528	0.153681
318.133	9.94113	C15H18N4O4	Trp-Asn	Level 2	Peptide(di-)	2.45177	1.15208	2.12369	1.40641	0.175273	0.226122	0.0623714	0.301161
278.094	12.1452	C10H18N2O5S	Glu-Met	Level 2	Peptide(di-)	12.756	1.3325	11.024	not detected	0.265401	NA	0.148681	NA
262.08	17.1638	C9H14N2O7	Glu-Asp	Level 2	Peptide(di-)	0.902484	0.953398	0.752702	2.34557	0.167881	0.118527	0.0878029	0.119932
337.175	14.0645	C15H23N5O4	L-Tyrosyl-L-arginine	Level 2	Peptide(di-)	5.05284	1.48621	3.68219	5.85757	0.567361	0.866121	0.0989502	0.359526
276.096	16.6594	C10H16N2O7	Glu-Glu	Level 2	Peptide(di-)	2.03846	1.01215	1.46755	2.17205	0.138651	0.141569	0.150849	0.213991
202.132	12.7516	C9H18N2O3	Leu-Ala	Level 2	Peptide(di-)	1.46028	0.959162	0.923524	1.07947	0.476986	0.274429	0.161764	0.309197
261.096	11.6823	C9H15N3O6	Asp-Gln	Level 2	Peptide(di-)	1.81593	0.847854	0.732516	2.06204	0.364787	0.184604	0.110164	0.343087
246.122	12.4163	C10H18N2O5	L-gamma-glutamyl-L-valine	Level 2	Peptide	1.79923	1.13485	4.1799	1.25359	0.171744	0.125855	0.138044	0.125392
218.09	15.001	C8H14N2O5	gamma-L-Glutamyl-D-alanine	Level 2	Peptide	0.974626	1.52042	2.15569	0.558654	0.144848	0.13951	0.134463	0.15702
204.075	15.8128	C7H12N2O5	L-beta-aspartyl-L-alanine	Level 2	Peptide	0.960561	1.44966	1.80414	0.914144	0.133541	0.211924	0.171772	0.0644722
220.07	15.6223	C7H12N2O6	L-beta-aspartyl-L-serine	Level 2	Peptide	1.95551	1.34545	3.62918	0.706811	0.376425	0.484031	0.298176	0.106391
234.085	15.4807	C8H14N2O6	L-beta-aspartyl-L-threonine	Level 2	Peptide	1.69251	1.30162	3.00779	0.946426	0.102708	0.165193	0.159642	0.144103
246.122	13.0608	C10H18N2O5	L-beta-aspartyl-L-leucine	Level 2	Peptide	3.54314	1.53692	6.08158	4.49261	0.376753	0.238078	0.270455	0.283577
310.116	13.6108	C14H18N2O6	Gamma-Glutamyltyrosine	Level 2	Peptide	3.09125	1.55268	5.21883	1.18985	0.144258	0.182634	0.154337	0.00799155
260.137	11.0045	C11H20N2O5	L-gamma-glutamyl-L-isoleucine	Level 2	Peptide	2.00601	1.1833	3.25216	2.98397	0.25453	0.216951	0.158268	0.288733
276.096	17.1399	C10H16N2O7	GammaGlutamylglutamicacid	Level 2	Peptide	2.12806	1.21917	3.07489	1.48102	0.122344	0.270041	0.0793439	0.383524
275.112	15.1559	C10H17N3O6	Gamma-Glutamylglutamine	Level 2	Peptide	2.57396	1.41987	3.59022	not detected	0.0203794	0.233336	0.144222	NA
260.137	11.5897	C11H20N2O5	L-gamma-glutamyl-L-leucine	Level 2	Peptide	2.39976	1.22142	2.44931	1.0576	0.167718	0.0967036	0.177022	0.187381
248.064	17.2655	C8H12N2O7	L-beta-aspartyl-L-asparticacid	Level 2	Peptide	0.997189	1.11106	0.917457	1.69096	0.0940401	0.201562	0.226834	0.0943287
261.132	16.3353	C10H19N3O5	Gammaglutamylornithine	Level 2	Peptide	0.863489	0.871566	0.709372	0.886504	0.318311	0.0746195	0.195893	0.113966
262.08	14.1239	C9H14N2O7	L-beta-aspartyl-L-glutamicacid	Level 2	Peptide	2.23758	0.923114	1.28197	1.60337	0.387862	0.130728	0.141284	0.200958
663.109	14.0741	C21H27N7O14P2	NAD+	Level 2	Energy Metabolism	1.23314	1.07372	1.27126	1.57099	0.23078	0.143462	0.117467	0.0840767
97.9769	13.1969	H3O4P	Orthophosphate	Level 2	Energy Metabolism	0.960656	1.0418	0.804016	0.572242	0.385543	0.546697	0.295606	0.662234
97.9768	15.7967	H3O4P	Orthophosphate	Level 2	Energy Metabolism	0.816654	1.04218	0.608058	0.572242	0.639076	0.978024	0.431078	0.662234
665.125	13.2955	C21H29N7O14P2	NADH	Level 2	Energy Metabolism	1.66753	1.00739	1.02988	1.1844	0.256177	0.184364	0.210132	0.376203
339.996	18.9512	C6H14O12P2	D-Fructose 1,6-bisphosphate	Level 2	Energy Metabolism	0.867516	1.19998	0.393121	0.454371	0.598392	1.1411	0.446574	0.817064
150.068	6.898	C9H10O2	4-Coumaryl alcohol	Level 2	Biosynthesis of Secondary Metabolites	1.71357	0.916342	4.97165	not detected	0.730495	0.211959	1.07952	NA
202.095	12.8147	C8H14N2O4	Proclavaminic acid	Level 2	Biosynthesis of Secondary Metabolites	4.36008	1.49809	8.03349	0.97029	0.0445394	0.146811	0.267589	0.0392169
88.0635	14.2331	C3H8N2O	N,N'-Dimethylurea	Level 2	Biosynthesis of Secondary Metabolites	1.57248	1.16265	2.38761	not detected	0.152408	0.247308	0.177735	NA
385.188	9.37453	C22H27NO5	O-methylandrocymbine	Level 2	Biosynthesis of Secondary Metabolites	1.04087	1.04897	1.46159	not detected	0.103362	0.127543	0.0929678	NA
286.048	15.3499	C15H10O6	2'-Hydroxygenistein	Level 2	Biosynthesis of Secondary Metabolites	1.36985	0.972154	1.48583	not detected	0.0789218	0.185868	0.0706767	NA
240.147	9.83459	C12H20N2O3	Slaframine	Level 2	Biosynthesis of Secondary Metabolites	1.31776	1.00571	1.15339	1.65475	0.379825	0.166905	0.141989	0.0956593
200.079	9.52005	C8H12N2O4	Dihydroclavaminic acid	Level 2	Biosynthesis of Secondary Metabolites	2.28448	1.52341	1.93178	not detected	0.41473	0.0954584	0.0940025	NA
383.18	11.1637	C16H25N5O6	Dihydrozeatin-O-glucoside	Level 2	Biosynthesis of Secondary Metabolites	0.869469	0.93833	0.524234	1.23003	0.352164	0.303498	0.0605676	0.168078
369.121	11.0667	C20H19NO6	6-Hydroxyprotopine	Level 2	Biosynthesis of Secondary Metabolites	1.1678	1.04079	0.260579	not detected	0.286094	0.0282878	0.228848	NA
307.084	15.3046	C18H13NO4	Stealthin C	Level 2	Biosynthesis of Polyketides and Nonribosomal Peptides	1.44387	1.10436	2.24271	not detected	0.111725	0.132379	0.0566582	NA
306.052	12.2508	C18H10O5	Kinobscurinone	Level 2	Biosynthesis of Polyketides and Nonribosomal Peptides	3.58933	1.25542	2.07178	not detected	0.150414	0.230551	0.083842	NA
191.025	14.9478	C6H9NO4S	a Cysteine adduct	Level 2	Medium Contaminant	0.69587	1.11155	0.159765	not detected	0.213083	0.0904618	NA	NA
238.099	10.5246	C8H18N2O4S	HEPES	Level 2	Medium Component	1.77807	1.02689	2.14238	not detected	0.193814	0.0848936	0.061393	NA
151.03	14.2339	C8H18N2O6S2	PIPES	Level 2	Medium Component	1.02091	0.938192	1.00893	0.878914	0.0164473	0.0332614	0.0233094	0.3821
354.056	7.05158	C19H14O5S	Phenolsulfonphthalein	Level 2	Medium Component	1.39015	0.982614	1.07106	0.884788	0.128805	0.125972	0.104608	0.659268
240.147	12.7542	C12H20N2O3	Pirbuterol	Level 2	Xenobiotics Drugs etc	1.41749	1.04347	1.38433	1.78323	0.286138	0.133893	0.31972	0.0819771
136.053	7.05153	C8H8O2	Toluate	Level 2	Xenobiotics Biodegradation and Metabolism	1.3443	1.01397	3.53222	not detected	0.284511	0.169913	1.02334	NA
122.037	7.09475	C7H6O2	4-Hydroxybenzaldehyde	Level 2	Xenobiotics Biodegradation and Metabolism	1.17364	0.923381	2.76238	not detected	0.272902	0.0506031	0.819996	NA
131.095	13.5249	C6H13NO2	6-Aminohexanoate	Level 2	Xenobiotics Biodegradation and Metabolism	1.26522	0.838755	1.50876	not detected	0.263177	0.0995416	0.141614	NA
137.048	12.3087	C7H7NO2	4-Nitrotoluene	Level 2	Xenobiotics Biodegradation and Metabolism	1.13453	0.781485	1.22265	1.17443	0.381358	0.215621	0.0642163	0.307734
166.027	14.6694	C8H6O4	Phthalate	Level 2	Xenobiotics Biodegradation and Metabolism	1.10217	1.08143	1.14425	not detected	0.00422829	0.0817259	0.0632321	NA
166.027	15.0931	C8H6O4	4-Hydroxyphenylglyoxylate	Level 2	Xenobiotics Biodegradation and Metabolism	1.1184	1.13666	1.03241	not detected	0.145969	0.0909459	0.104838	NA
117.058	8.80168	C8H7N	Phenylacetonitrile	Level 2	Xenobiotics Biodegradation and Metabolism	1.18872	1.02038	0.971508	not detected	0.382659	0.207549	0.163464	NA
126.032	14.8515	C6H6O3	Benzene-1,2,4-triol	Level 2	Xenobiotics Biodegradation and Metabolism	0.568073	0.830809	not detected	not detected	0.0957045	0.321855	NA	NA
169.989	17.194	C3H6O6S	Glycerone sulfate	Level 2	Unmapped	0.927085	0.706956	7.22276	not detected	0.439826	0.31127	1.18336	NA
243.183	4.82128	C13H25NO3	N-Undecanoylglycine	Level 2	Unmapped	0.816191	0.980847	4.40497	not detected	0.587958	0.471408	0.362802	NA
313.132	12.4716	C18H19NO4	Acetylcaranine	Level 2	Unmapped	17.2333	not detected	91.7266	not detected	NA	NA	0.288988	NA
229.168	5.03538	C12H23NO3	N-Decanoylglycine	Level 2	Unmapped	0.7353	0.643304	3.84088	not detected	0.666275	0.139792	0.35853	NA
129.058	11.5181	C9H7N	Isoquinoline	Level 2	Unmapped	13.5946	not detected	69.8218	0.820164	NA	NA	0.285883	0.479896
153.994	16.2359	C3H6O5S	3-sulfopropanoate	Level 2	Unmapped	0.613793	0.761409	2.91011	not detected	0.639374	0.764686	0.336979	NA
215.152	5.09566	C11H21NO3	N-Nonanoylglycine	Level 2	Unmapped	0.841316	0.683049	3.88367	0.813461	0.948269	1.13348	0.420067	0.790864
275.137	9.81157	C12H21NO6	Glutarylcarnitine	Level 2	Unmapped	0.262881	0.634737	1.18722	9.3273	NA	0.880526	0.920896	NA
304.091	12.8073	C11H16N2O8	N-Acetyl-aspartyl-glutamate	Level 2	Unmapped	1.89856	1.31875	8.31866	1.21918	0.0739485	0.453731	0.07743	0.228241
275.112	14.3379	C10H17N3O6	Norophthalmicacid	Level 2	Unmapped	1.84312	1.30163	7.95636	1.73464	0.193049	0.139106	0.225005	0.362011
103.027	10.8519	C3H5NO3	Pyruvate oxime	Level 2	Unmapped	0.475025	0.818618	1.91902	not detected	NA	0.218835	0.794396	NA
278.188	4.04581	C17H26O3	[6]-Paradol	Level 2	Unmapped	1.09025	0.928184	4.14416	not detected	0.686712	0.269401	0.905388	NA
155.07	16.1007	C6H9N3O2	3-(Pyrazol-1-yl)-L-alanine	Level 2	Unmapped	1.89494	1.25923	6.41737	2.60852	0.176711	0.332986	0.200583	0.25961
267.096	16.5211	C9H17NO8	Neuraminic acid	Level 2	Unmapped	1.14736	1.12475	3.43964	0.742364	0.206445	0.171524	0.0103699	NA
294.183	4.04814	C17H26O4	Phytuberin	Level 2	Unmapped	1.6331	0.671745	4.50491	not detected	0.494497	0.208169	1.08233	NA
186.064	14.4561	C7H10N2O4	(S)-AMPA	Level 2	Unmapped	0.578569	1.06007	1.56191	0.68758	0.194065	0.547229	0.259401	0.0670687
202.143	20.9062	C8H18N4O2	Arg-OEt	Level 2	Unmapped	3.38719	2.02149	8.87877	1.89968	0.171245	0.257166	0.102045	0.11412
161.051	7.25327	C6H11NO2S	allylcysteine	Level 2	Unmapped	3.63134	1.17898	9.34189	3.24277	0.270185	0.251566	0.123623	0.110339
172.074	10.9875	C8H12O4	2-Octenedioicacid	Level 2	Unmapped	0.563342	0.464921	1.36934	0.311012	0.767013	0.461069	0.813926	0.166373
204.075	16.1503	C7H12N2O5	5-L-Glutamylglycine	Level 2	Unmapped	1.0951	1.37075	2.5853	0.886462	0.147785	0.0736973	0.187019	0.119256
321.099	12.8951	C11H19N3O6S	gamma-L-Glutamyl-L-cysteinyl-beta-alanine	Level 2	Unmapped	1.06187	1.04064	2.44355	3.24437	0.0987737	0.197139	0.124915	0.242396
269.112	12.8346	C10H15N5O4	formycin A	Level 2	Unmapped	3.6811	1.50774	7.79876	1.01445	0.114504	0.0587343	0.250345	0.119439
189.075	14.5926	C6H11N3O4	N-Amidino-L-glutamate	Level 2	Unmapped	2.1235	1.38616	4.29384	1.00901	0.0669555	0.0508473	0.223032	0.385349
304.102	15.6306	C10H16N4O7	Vicine	Level 2	Unmapped	1.01066	0.733002	2.03642	2.5201	0.450226	0.391167	0.298927	0.137588
145.053	11.52	C9H7NO	3-Methyleneoxindole	Level 2	Unmapped	1.8666	0.899897	3.73439	0.877222	0.391751	0.389125	0.248358	0.0184944
242.019	16.765	C6H11O8P	D-myo-Inositol 1,2-cyclic phosphate	Level 2	Unmapped	0.815171	0.981275	1.61587	0.393941	0.185962	0.0871167	0.190002	0.741964
183.02	15.5718	C4H9NO5S	L-Homocysteic acid	Level 2	Unmapped	4.68773	0.808401	9.07214	not detected	0.549033	0.871221	0.220884	NA
296.101	14.0467	C13H16N2O6	4-Nitrophenyl-3-ketovalidamine	Level 2	Unmapped	1.63004	1.30884	3.1264	0.694917	0.104641	0.199818	0.349195	0.866032
222.126	4.54677	C13H18O3	Dehydrovomifoliol	Level 2	Unmapped	1.04377	1.07986	1.96676	not detected	1.14574	0.410221	0.175111	NA
219.074	13.7531	C8H13NO6	N-Acetyl-D-mannosaminolactone	Level 2	Unmapped	2.37451	1.13582	4.44507	not detected	0.146308	0.158443	0.0780258	NA
247.142	11.3941	C11H21NO5	Hydroxybutyrylcarnitine	Level 2	Unmapped	1.2095	1.36919	2.25312	2.84193	0.524233	0.270258	0.337949	0.0434523
192.115	4.38735	C12H16O2	Thymyl acetate	Level 2	Unmapped	1.20474	0.660688	2.2337	not detected	0.568918	0.53261	0.643152	NA
270.096	14.8046	C10H14N4O5	6-Hydroxyl-1,6-dihydropurine ribonucleoside	Level 2	Unmapped	0.895102	1.11257	1.65106	1.04503	0.10319	0.0790556	0.170507	0.0786524
234.1	8.1655	C12H14N2O3	5-Methoxytryptophan	Level 2	Unmapped	1.38248	0.684999	2.4813	not detected	0.270098	0.304631	0.215189	NA
284.112	14.5903	C11H16N4O5	Coformycin	Level 2	Unmapped	1.90345	1.47361	3.3895	2.71825	0.0475213	0.0167237	0.133683	0.109539
160.11	5.10248	C8H16O3	Ethyl (R)-3-hydroxyhexanoate	Level 2	Unmapped	1.02844	0.885681	1.73569	not detected	0.229378	0.0381754	0.48173	NA
220.106	11.3213	C8H16N2O5	3-[4-amino-3-hydroxybutyl]-hydroxy-carbamoyl-propanoate	Level 2	Unmapped	4.15732	1.45728	6.92228	1.0615	0.214271	0.111253	0.212512	0.101599
251.1	14.4225	C9H17NO7	Muramic acid	Level 2	Unmapped	0.938957	0.947111	1.53151	2.22334	0.421322	0.170367	0.21241	0.143074
256.106	12.9956	C11H16N2O5	1-(beta-D-Ribofuranosyl)-1,4-dihydronicotinamide	Level 2	Unmapped	2.36765	1.17939	3.85377	1.14932	0.308852	0.236452	0.130603	0.265549
208.11	4.84168	C12H16O3	Benzyl (2R,3S)-2-methyl-3-hydroxybutanoate	Level 2	Unmapped	0.815016	1.04057	1.32642	not detected	0.871577	0.882827	0.335866	NA
323.052	16.2212	C9H14N3O8P	Cytidine 2'-phosphate	Level 2	Unmapped	0.660276	1.05928	1.06699	1.7043	0.206433	0.121503	0.118665	0.124704
231.111	12.7029	C10H17NO5	Isovalerylglutamicacid	Level 2	Unmapped	1.81052	1.11009	2.90902	0.813755	0.102294	0.0510517	0.11427	0.185098
459.261	4.20457	C26H37NO6	Militarinone A	Level 2	Unmapped	0.949995	0.993427	1.50771	not detected	0.87732	0.870838	0.262937	NA
132.053	13.9755	C4H8N2O3	D-Asparagine	Level 2	Unmapped	1.95432	1.15591	3.08261	not detected	0.159415	0.0854862	0.0523106	NA
172.085	11.5751	C7H12N2O3	L-prolyl-L-glycine	Level 2	Unmapped	2.1152	1.264	3.28166	not detected	0.174176	0.0206874	0.173383	NA
114.079	15.3186	C5H10N2O	3-Amino-2-piperidone	Level 2	Unmapped	2.11693	1.3371	3.28054	not detected	0.113374	0.0523592	0.199259	NA
545.233	16.3213	C22H35N5O11	Dihydrozeatin-9-N-glucoside-O-glucoside	Level 2	Unmapped	2.33694	1.3665	3.5883	0.889342	0.092485	0.0570938	0.198719	0.266185
192.079	4.1914	C11H12O3	Carpacin	Level 2	Unmapped	0.763661	0.770523	1.16626	not detected	0.923264	1.04693	0.026569	NA
291.095	13.1049	C11H17NO8	2,7-Anhydro-alpha-N-acetylneuraminic acid	Level 2	Unmapped	1.03308	1.19777	1.54899	2.16753	0.269587	0.21004	0.208587	0.130352
301.143	8.65246	C16H19N3O3	Febrifugine	Level 2	Unmapped	1.07218	1.23675	1.60751	0.538689	0.0823992	0.196987	0.107029	0.235361
261.121	12.9228	C11H19NO6	Lotaustralin	Level 2	Unmapped	0.897762	0.75831	1.34598	not detected	0.289061	0.102852	0.169114	NA
236.178	4.21469	C15H24O2	Latia luciferin	Level 2	Unmapped	0.977788	0.900005	1.45766	not detected	0.0433415	0.0968876	0.421269	NA
190.099	4.20611	C12H14O2	Propyl cinnamate	Level 2	Unmapped	0.753562	0.61025	1.10448	0.34201	0.891128	0.912957	0.195025	0.764039
232.106	7.51315	C9H16N2O5	Boc-Asn	Level 2	Unmapped	1.81	2.06478	2.64239	not detected	0.130542	0.961193	0.138708	NA
204.111	17.7576	C8H16N2O4	N5-(L-1-Carboxyethyl)-L-ornithine	Level 2	Unmapped	1.36111	1.12253	1.96957	not detected	0.188096	0.121634	0.214337	NA
350.052	15.3596	C11H15N2O9P	Clitidine 5'-phosphate	Level 2	Unmapped	0.705088	1.44517	1.01375	not detected	0.026992	0.423022	0.293811	NA
257.101	10.8787	C10H15N3O5	5-Methylcytidine	Level 2	Unmapped	6.97171	1.3573	9.86757	not detected	0.178482	0.0469535	0.12589	NA
203.08	12.0199	C8H13NO5	2-acetamidoglucal	Level 2	Unmapped	1.95787	0.781818	2.76982	2.18409	0.278971	0.234664	0.166259	0.0541199
228.147	7.92949	C11H20N2O3	L-isoleucyl-L-proline	Level 2	Unmapped	1.81972	1.37868	2.55722	2.46434	0.140181	0.173175	0.175159	0.219739
332.148	10.153	C16H20N4O4	acinetobactin	Level 2	Unmapped	1.29264	1.08397	1.80578	1.93939	0.010159	0.223625	0.103937	0.157965
268.079	14.751	C9H16O9	2(alpha-D-Mannosyl)-D-glycerate	Level 2	Unmapped	1.05175	0.907423	1.42137	not detected	0.294009	0.154075	0.164988	NA
478.071	15.154	C17H22N2O10S2	4-methoxy-3-indolylmethyl-glucosinolate	Level 2	Unmapped	1.32887	1.26928	1.79132	1.68374	0.104149	0.0583942	0.141961	0.120653
134.073	4.18409	C9H10O	Cinnamyl alcohol	Level 2	Unmapped	0.846379	0.655057	1.13414	not detected	0.906726	0.882346	0.206977	NA
282.137	4.17415	C17H18N2O2	NAC	Level 2	Unmapped	0.866715	0.658402	1.15865	not detected	0.893448	0.911273	0.266229	NA
268.121	4.87836	C16H16N2O2	N-Butyl-beta-carboline-3-carboxylate	Level 2	Unmapped	1.43991	1.23356	1.90887	1.74403	0.0770682	0.183485	0.0362488	0.175341
116.047	4.19389	C5H8O3	ethylpyruvate	Level 2	Unmapped	0.815003	0.648813	1.07714	not detected	0.915244	0.921116	0.185615	NA
176.08	13.1486	C6H12N2O4	N5-formyl-N5-hydroxy-L-ornithine	Level 2	Unmapped	1.53612	1.19814	2.00475	not detected	0.283422	0.511458	0.131727	NA
260.083	7.16839	C10H16N2O4S	d-biotin d-sulfoxide	Level 2	Unmapped	89.0767	not detected	116.037	not detected	0.391207	NA	0.267845	NA
170.131	4.28287	C10H18O2	10-hydroxygeraniol	Level 2	Unmapped	1.30503	0.772336	1.68784	not detected	0.029863	0.21362	0.229456	NA
432.214	4.17544	C24H32O7	Inflexin	Level 2	Unmapped	0.851759	0.657759	1.09127	not detected	0.9269	0.919865	0.172945	NA
129.152	14.2095	C8H19N	Octylamine	Level 2	Unmapped	1.03283	0.813155	1.30427	not detected	0.463498	0.347249	0.448012	NA
137.048	14.9748	C7H7NO2	3-Pyridylaceticacid	Level 2	Unmapped	11.3858	1.68859	14.3728	1.10171	0.189261	0.11519	0.217953	0.0770157
130.111	10.5571	C6H14N2O	&epsilon;-aminocaproamide	Level 2	Unmapped	1.3833	1.05996	1.74057	1.02453	0.141277	0.113104	0.0337966	0.100958
244.106	15.0342	C10H16N2O5	dihydrothymidine	Level 2	Unmapped	1.60438	1.24046	2.0091	0.860337	0.168081	0.188244	0.108107	0.0388662
613.564	5.27065	C37H75NO5	N-(2-hydroxynonadecanoyl)-phytosphingosine	Level 2	Unmapped	1.20487	1.20407	1.49513	0.726593	0.783518	0.619347	0.0627486	0.395994
122.048	14.1631	C6H6N2O	Isonicotineamide	Level 2	Unmapped	1.28973	1.1014	1.60027	1.13598	0.206284	0.224897	0.233397	0.0613973
324.153	16.5678	C12H24N2O8	Procollagen 5-(D-galactosyloxy)-L-lysine	Level 2	Unmapped	1.87446	1.23673	2.29324	2.3254	0.13308	0.171295	0.171473	0.180943
109.064	12.0787	C5H7N3	Brunfelsamidine	Level 2	Unmapped	1.04957	1.18419	1.26812	0.68113	0.225006	0.210932	0.149548	0.235089
244.178	4.96146	C12H24N2O3	N-(6-Aminohexanoyl)-6-aminohexanoate	Level 2	Unmapped	1.96995	1.17367	2.3465	not detected	0.297095	0.186306	0.187883	NA
132.079	5.13006	C6H12O3	Ethyl (R)-3-hydroxybutanoate	Level 2	Unmapped	1.16032	1.47155	1.35557	not detected	0.3597	0.409359	0.273385	NA
129.079	21.2265	C6H11NO2	(R)-piperidine-3-carboxylate	Level 2	Unmapped	1.23373	1.12025	1.42277	not detected	0.191421	0.194494	0.101297	NA
223.121	5.32914	C12H17NO3	Cerulenin	Level 2	Unmapped	0.929892	0.900347	1.07165	not detected	0.0782535	0.110183	0.191236	NA
246.122	7.10606	C10H18N2O5	2,4-diacetamido-2,4,6-trideoxy-&beta;-L-altropyranose	Level 2	Unmapped	5.16495	2.46967	5.94442	1.78244	0.295635	0.882294	0.0643846	0.52843
320.122	16.1149	C12H20N2O8	3-Epihydroxy-2'-deoxymugineic acid	Level 2	Unmapped	591.301	not detected	678.061	not detected	0.180936	NA	0.0724184	NA
428.366	3.89212	C29H48O2	(24R,24'R)-Fucosterol epoxide	Level 2	Unmapped	1.15565	1.2982	1.32251	1.12456	0.169813	0.203188	0.0651023	0.295514
228.111	11.7514	C10H16N2O4	(S)-ATPA	Level 2	Unmapped	0.879857	0.799083	0.995244	not detected	0.151159	0.0482752	0.0683497	NA
226.107	11.9531	C9H14N4O3	(6R)-6-(L-Erythro-1,2-Dihydroxypropyl)-5,6,7,8-tetrahydro-4a-hydroxypterin	Level 2	Unmapped	1.9414	1.18285	2.18284	0.878717	0.210449	0.115091	0.107756	0.101461
297.089	7.15527	C11H15N5O3S	5'-methylthioformycin	Level 2	Unmapped	3.75903	1.14198	4.21556	2.46973	0.156354	0.179519	0.10559	0.480847
206.09	12.1663	C7H14N2O5	N-hydroxy DAP	Level 2	Unmapped	5.77374	1.19027	6.41389	1.13322	0.13809	0.148952	0.0446518	0.015748
1135.79	7.09448	C60H113NO18	Trihexosylceramide (d18:1/24:0)	Level 2	Unmapped	1.10614	0.989328	1.21217	2.06351	0.0738041	0.263884	0.266323	0.205078
302.159	9.61259	C12H22N4O5	Neuromedin B (1-3)	Level 2	Unmapped	6.26956	1.28753	6.83481	1.67621	0.200313	0.159816	0.0563025	0.392073
221.09	13.6752	C8H15NO6	N-Acetyl-beta-D-glucosamine	Level 2	Unmapped	1.32527	1.16703	1.43482	1.64596	0.290738	0.132378	0.172242	0.414521
288.06	12.2234	C10H12N2O8	Orotidine	Level 2	Unmapped	1.37785	1.10636	1.48796	not detected	0.263929	0.166011	0.0991987	NA
250.12	4.20265	C14H18O4	Methylripariochromene A	Level 2	Unmapped	0.920101	0.622348	0.979704	not detected	1.08454	0.868319	0.221868	NA
541.06	14.0883	C15H21N5O13P2	Cyclic ADP-ribose	Level 2	Unmapped	1.30068	1.08569	1.3828	not detected	0.172009	0.0588963	0.089921	NA
291.095	12.4277	C11H17NO8	2-Deoxy-2,3-dehydro-N-acetylneuraminic acid	Level 2	Unmapped	1.3536	1.04408	1.42338	not detected	0.477077	0.142506	0.194475	NA
334.067	15.971	C9H19O11P	sn-glycero-3-Phospho-1-inositol	Level 2	Unmapped	0.807654	0.934452	0.847709	0.894879	0.347456	0.093194	0.213812	0.086883
190.095	11.2352	C7H14N2O4	N5-acetyl-N5-hydroxy-L-ornithine	Level 2	Unmapped	4.2123	1.20303	4.41201	1.23924	0.270078	0.104404	0.117296	0.0960768
289.127	13.3362	C11H19N3O6	Ophthalmicacid	Level 2	Unmapped	1.6238	0.95917	1.69466	1.91692	0.220904	0.0730773	0.17607	0.274476
308.158	20.6418	C12H24N2O7	psicoselysine	Level 2	Unmapped	1.95645	1.24357	2.03567	1.6818	0.044309	0.192219	0.0609523	0.286101
309.106	14.7415	C11H19NO9	O-Acetylneuraminic acid	Level 2	Unmapped	1.20048	1.04246	1.24657	1.58343	0.348061	0.217942	0.252922	0.231217
255.111	7.00873	C12H17NO5	N-D-Glucosylarylamine	Level 2	Unmapped	1.06271	1.09884	1.09572	not detected	0.0209422	0.0874409	0.0947965	NA
212.068	7.08211	C10H12O5	Danielone	Level 2	Unmapped	0.986193	0.84669	1.01508	not detected	0.0719862	0.0266333	0.0814632	NA
427.366	4.56275	C25H49NO4	Stearoylcarnitine	Level 2	Unmapped	1.5073	1.16104	1.53894	not detected	0.228507	0.0623655	0.121837	NA
328.128	12.9888	C15H16N6O3	dihydrohomopteroate	Level 2	Unmapped	1.87018	1.31448	1.90888	not detected	0.152839	0.179723	0.176363	NA
326.039	14.6243	C13H14N2O4S2	Glitoxin	Level 2	Unmapped	1.20028	1.11948	1.22272	not detected	0.113806	0.0756442	0.110945	NA
559.134	15.3508	C18H31N3O13P2	dTDP-alpha-D-desosamine	Level 2	Unmapped	0.818161	0.938523	0.827968	not detected	0.137347	0.190759	0.0822892	NA
89.0841	16.5227	C4H11NO	N-dimethylethanolamine	Level 2	Unmapped	0.978597	0.976198	0.979529	not detected	0.32327	0.247444	0.108976	NA
383.142	13.7227	C14H25NO11	N-Acetyllactosamine	Level 2	Unmapped	1.21227	1.10095	1.21338	1.8595	0.261911	0.208233	0.214057	0.379925
147.089	7.73999	C6H13NO3	N-hydroxyisoleucine	Level 2	Unmapped	0.77159	0.847358	0.76769	1.16636	0.15311	0.0352606	0.288906	0.276594
320.051	16.3993	C8H17O11P	octulose 8-phosphate	Level 2	Unmapped	0.917544	1.18238	0.911525	not detected	0.177222	0.141054	0.097629	NA
423.335	4.62042	C25H45NO4	Linoelaidylcarnitine	Level 2	Unmapped	1.2883	0.940227	1.26309	not detected	0.21222	0.234824	0.10809	NA
116.131	13.0471	C6H16N2	1,6-diaminohexane	Level 2	Unmapped	1.05044	1.01429	1.02956	1.13105	0.0335476	0.050488	0.12494	0.0614202
1133.78	7.07748	C60H111NO18	Trihexosylceramide (d18:1/24:1(15Z))	Level 2	Unmapped	1.29258	0.981891	1.25878	2.12445	0.210033	0.237126	0.0620343	0.319715
147.089	12.1707	C6H13NO3	Fagomine	Level 2	Unmapped	0.777047	0.76472	0.752499	1.36779	0.155662	0.13382	0.192122	0.225904
155.095	7.01158	C8H13NO2	Arecoline	Level 2	Unmapped	1.04217	0.994231	1.00568	0.635518	0.028804	0.0721069	0.048074	0.368441
101.12	9.7431	C6H15N	Hexylamine	Level 2	Unmapped	1.06941	1.0137	1.02313	not detected	0.0821816	0.042988	0.086357	NA
252.111	7.9908	C12H16N2O4	3-Hydroxyhexobarbital	Level 2	Unmapped	2.50165	1.04132	2.38665	0.72295	0.157095	0.220275	0.322034	0.231071
921.216	17.3168	C30H50N7O18P3S	7-Methyl-3-oxooctanoyl-CoA	Level 2	Unmapped	1.07602	0.926314	1.01911	not detected	0.121195	0.0448328	0.178492	NA
425.35	4.58821	C25H47NO4	Oleoylcarnitine	Level 2	Unmapped	1.61952	0.964153	1.53271	not detected	0.233446	0.137795	0.225586	NA
283.324	7.28168	C19H41N	CTAB	Level 2	Unmapped	2.12381	1.25125	2.0059	3.31421	0.0544441	0.355925	0.255973	0.578997
223.105	12.0616	C8H17NO6	N-acetyl -D- glucosaminitol	Level 2	Unmapped	1.4334	1.04466	1.34804	2.40114	0.410293	0.232088	0.317012	0.123949
169.085	12.485	C7H11N3O2	Nalpha-Methylhistidine	Level 2	Unmapped	3.99084	1.16444	3.62414	not detected	0.65164	NA	0.177506	NA
122.048	7.29076	C6H6N2O	Picolinamide	Level 2	Unmapped	1.74491	1.24881	1.57606	1.81702	0.425238	0.330904	0.22232	0.310776
175.085	9.65331	C7H13NO4	alpha-aminopimelate	Level 2	Unmapped	1.03152	1.05888	0.927655	not detected	0.0398679	0.250827	0.086799	NA
357.201	15.3956	C15H27N5O5	E-64	Level 2	Unmapped	2.16601	1.57211	1.9363	0.808954	0.105337	0.166941	0.0616292	0.222568
335.133	15.8051	C12H21N3O8	N4-(Acetyl-beta-D-glucosaminyl)asparagine	Level 2	Unmapped	1.25257	1.02424	1.10929	1.80281	0.325157	0.322968	0.213872	0.0734514
191.062	7.08654	C7H13NO3S	N-Acetylmethionine	Level 2	Unmapped	5.07903	1.39343	4.44838	0.73256	0.345008	0.32949	0.158113	0.966326
210.029	21.6198	C6H11O6P	3-propylphosphoenolpyruvate	Level 2	Unmapped	1.02646	0.982609	0.898813	1.25125	0.183785	0.0430458	0.144849	0.276164
647.252	5.09954	C21H42N7O14P	3'-Deoxydihydrostreptomycin 6-phosphate	Level 2	Unmapped	1.12761	0.490181	0.977285	not detected	0.690519	0.363769	0.916206	NA
174.137	10.4562	C8H18N2O2	Ne,Ne dimethyllysine	Level 2	Unmapped	1.78102	1.08351	1.54012	0.871035	0.369529	0.327681	0.124373	0.442856
305.086	18.1785	C10H15N3O8	Convicine	Level 2	Unmapped	0.987046	1.12204	0.850504	1.27166	0.123818	0.515564	0.0366569	0.44082
370.308	3.92544	C22H42O4	Di(2-ethylhexyl) adipate	Level 2	Unmapped	0.544211	0.37547	0.462702	2.01306	0.398102	0.142043	0.110967	0.334148
327.095	11.2325	C14H17NO8	Acetaminophenglucuronide	Level 2	Unmapped	1.48726	0.807559	1.25145	not detected	0.156927	0.161824	0.208412	NA
390.277	3.91127	C24H38O4	Bis(2-ethylhexyl)phthalate	Level 2	Unmapped	1.92632	1.1537	1.61326	not detected	0.149739	0.159118	0.0957551	NA
287.112	15.1943	C11H17N3O6	N-Ribosylhistidine	Level 2	Unmapped	1.83431	1.51734	1.53524	not detected	0.32987	0.0496415	0.0312697	NA
246.085	13.7304	C9H14N2O6	5-6-Dihydrouridine	Level 2	Unmapped	2.05429	0.989687	1.69896	2.6417	0.256355	0.299965	0.137903	0.183465
259.046	12.0585	C6H14NO8P	glycerophosphoserine	Level 2	Unmapped	1.54123	0.877545	1.26275	not detected	0.320251	0.220963	0.202575	NA
614.173	8.55311	C23H31N6O12P	7,8-H2pterin-6-ylmethyl-l-(4-aminophenyl)-1-deoxy-5-[1-&alpha; -D- ribofuranosyl 5-phosphate]-D-ribitol	Level 2	Unmapped	1.14599	1.00314	0.934287	not detected	0.0468657	0.0266547	0.168313	NA
266.155	3.77282	C12H26O4S	sodium dodecyl sulfate	Level 2	Unmapped	1.56671	0.998893	1.2715	not detected	0.148419	0.203962	0.216189	NA
237.085	13.0138	C8H15NO7	N-Glycolyl-D-glucosamine	Level 2	Unmapped	1.49937	1.02769	1.21289	not detected	0.512471	0.351354	0.170614	NA
137.048	16.6759	C7H7NO2	m-Aminobenzoicacid	Level 2	Unmapped	1.22446	0.988886	0.977819	0.241559	0.24568	0.270981	0.241953	0.284784
222.11	7.37977	C9H18O6	isopropyl &beta;-D-galactopyranoside	Level 2	Unmapped	0.857846	0.537505	0.683641	0.638501	0.546996	0.4095	0.286879	0.419559
274.045	14.7252	C7H15O9P	1-Deoxy-D-altro-heptulose 7-phosphate	Level 2	Unmapped	2.11558	0.967998	1.67076	not detected	0.183281	0.233702	0.0961759	NA
202.027	14.99	C11H6O4	Bergaptol	Level 2	Unmapped	0.817072	1.03571	0.642654	not detected	0.222772	0.0729959	0.0578068	NA
236.116	7.10695	C12H16N2O3	Carbetamide	Level 2	Unmapped	10.0516	2.40192	7.89795	not detected	0.150377	0.896452	0.234497	NA
179.058	16.664	C9H9NO3	2,5,6-Trihydroxy-5,6-dihydroquinoline	Level 2	Unmapped	1.17562	0.951365	0.921437	not detected	0.110034	0.242978	0.105727	NA
350.062	16.702	C9H19O12P	nonulose 9-phosphate	Level 2	Unmapped	0.900222	0.983452	0.705579	1.38466	0.0994193	0.164107	0.0604016	0.09032
275.148	15.1859	C11H21N3O5	Epsilon-(gamma-Glutamyl)-lysine	Level 2	Unmapped	2.1526	1.06715	1.66024	2.42397	0.24828	0.0608016	0.168946	0.34638
358.141	14.5777	C20H22O6	Miroestrol	Level 2	Unmapped	0.963615	1.02152	0.739403	not detected	0.0681605	0.107662	0.0494534	NA
212.009	13.5977	C5H9O7P	phosphinomethylisomalate	Level 2	Unmapped	1.02419	1.06174	0.783662	not detected	0.200591	0.164728	0.0691935	NA
159.126	13.3245	C8H17NO2	Methacholine	Level 2	Unmapped	1.37851	1.0595	1.03522	1.8032	0.449705	0.224514	0.190248	0.0255119
96.0213	13.9353	C5H4O2	Furfural	Level 2	Unmapped	1.02562	1.06562	0.764612	1.12995	0.182894	0.137513	0.0793512	0.154878
408.288	5.09882	C24H40O5	Bile salt	Level 2	Unmapped	1.8185	0.921904	1.35338	not detected	0.200717	0.222224	0.0255775	NA
376.189	4.87756	C21H28O6	Rhipocephalin	Level 2	Unmapped	1.21534	0.681092	0.897358	not detected	0.468815	0.145123	0.7024	NA
188.068	8.6882	C8H12O5	2-oxosuberate	Level 2	Unmapped	1.15471	0.92578	0.84885	0.136284	0.250569	0.126263	0.051415	0.395099
321.069	19.8604	C11H15NO10	beta-Citryl-L-glutamic acid	Level 2	Unmapped	0.966412	1.00693	0.705296	1.11626	0.505427	0.758607	0.201497	0.61587
213.111	14.1236	C9H15N3O3	Methyl 2-diazoacetamidohexonate	Level 2	Unmapped	1.52421	1.04527	1.10292	1.35835	0.526869	0.600258	0.242055	1.06702
332.053	14.5731	C16H12O8	3,3',4',5,7-Pentahydroxy-8-methoxyflavone	Level 2	Unmapped	0.853758	0.918921	0.612157	1.4351	0.104394	0.190988	0.135482	0.369617
408.287	7.08396	C24H40O5	3alpha,7alpha,12beta-Trihydroxy-5beta-cholanate	Level 2	Unmapped	1.93988	1.10701	1.38734	not detected	0.349713	0.482608	0.283654	NA
192.064	14.1492	C7H12O6	5D-5-O-Methyl-2,3,5/4,6-pentahydroxycyclohexanone	Level 2	Unmapped	1.3425	1.10119	0.945341	not detected	0.298861	0.0686239	0.00426474	NA
276.025	17.5599	C6H13O10P	2-Carboxy-D-arabinitol 1-phosphate	Level 2	Unmapped	0.965091	1.02838	0.664194	1.08273	0.259695	0.530075	0.0571315	0.330454
320.061	15.9277	C10H16N4O4S2	Ovothiol A-cysteine disulfide	Level 2	Unmapped	1.6772	0.863693	1.14391	not detected	0.0572873	0.157621	0.457643	NA
181.05	16.1002	C5H12NO4P	Phosphinothricin	Level 2	Unmapped	1.12978	0.9365	0.766684	not detected	0.267691	0.0474794	0.185031	NA
278.152	3.96552	C16H22O4	2-Ethylhexyl phthalate	Level 2	Unmapped	1.21121	1.02309	0.811012	not detected	0.149008	0.0773154	0.698432	NA
143.058	7.23092	C6H9NO3	Vinylacetylglycine	Level 2	Unmapped	5.1722	1.25189	3.45102	0.204466	0.277666	0.188765	0.180954	0.215733
89.0477	8.9594	C3H7NO2	Urethane	Level 2	Unmapped	1.36214	1.26612	0.885405	not detected	0.239763	0.146362	0.325129	NA
223.084	4.23809	C11H13NO4	Bendiocarb	Level 2	Unmapped	1.17647	1.21593	0.753583	not detected	0.192374	0.379931	0.877705	NA
191.08	12.1567	C7H13NO5	2-amino-3,7-dideoxy-D-threo-hept-6-ulosonate	Level 2	Unmapped	1.44782	1.09163	0.912501	0.0998471	0.253214	0.178959	0.0953062	NA
113.945	21.2508	H2O3S2	H2S2O3	Level 2	Unmapped	2.10935	1.64217	1.29793	not detected	0.362315	0.775404	0.0434508	NA
96.9689	14.9028	[H2PO4]-	Dihydrogenphosphate	Level 2	Unmapped	1.16614	1.02183	0.708654	not detected	0.110799	0.00482782	0.0973506	NA
159.09	12.3924	C7H13NO3	3-Dehydrocarnitine	Level 2	Unmapped	1.17983	0.953991	0.715924	1.07012	0.316497	0.0870074	0.107527	0.176535
151.049	16.5792	C5H5N5O	2-Hydroxyadenine	Level 2	Unmapped	0.989036	1.00947	0.597299	1.30859	0.110306	0.281252	0.109972	0.180706
237.085	12.3688	C8H15NO7	N-Acetyl-D-glucosaminate	Level 2	Unmapped	1.30734	0.968103	0.788048	not detected	0.499167	0.0178987	0.124372	NA
246.051	12.6719	C6H15O8P	Glycerophosphoglycerol	Level 2	Unmapped	1.79275	1.09267	1.08011	1.54387	0.254464	0.0870846	0.110364	0.178813
381.023	17.223	C8H17NO12P2	N-Acetyl-D-glucosamine 1,6-bisphosphate	Level 2	Unmapped	23.2598	3.04826	13.9286	0.901486	0.511372	1.3008	0.366813	NA
340.167	12.3613	C21H24O4	16beta-Hydroxy-3,11-dioxopregna-4,17(20)-dien-21-oic acid, gamma-lactone	Level 2	Unmapped	3.10629	1.47675	1.81979	2.65296	0.403549	0.0839944	0.158953	0.180388
134.073	6.24768	C9H10O	Phenylacetone	Level 2	Unmapped	0.943598	0.721142	0.547847	not detected	1.30574	0.732089	0.421093	NA
134.073	5.11699	C9H10O	Indan-1-ol	Level 2	Unmapped	1.1614	0.889374	0.648964	not detected	1.41837	0.865327	0.49948	NA
249.03	14.1274	C8H11NO6S	Norepinephrinesulfate	Level 2	Unmapped	1.44989	0.86359	0.795242	not detected	0.106888	0.118177	0.206482	NA
294.106	14.4072	C10H18N2O8	N-Glycosyl-L-asparagine	Level 2	Unmapped	1.41044	1.06593	0.76288	not detected	0.144039	0.212608	0.0747182	NA
187.063	8.70585	C11H9NO2	Indoleacrylicacid	Level 2	Unmapped	1.53954	1.11981	0.806131	not detected	0.542495	0.15516	0.118733	NA
171.03	16.3496	C3H10NO5P	serinol phosphate	Level 2	Unmapped	0.83534	0.907975	0.43502	1.28346	0.33466	0.193249	0.412242	0.433572
246.137	8.70923	C14H18N2O2	Hypaphorine	Level 2	Unmapped	1.45267	1.10041	0.710032	0.999392	0.550482	0.143454	0.0804124	0.198515
218.127	7.60113	C9H18N2O4	N-hydroxy-N-succinylcadaverine	Level 2	Unmapped	3.94078	2.40007	1.90475	not detected	0.29856	0.130511	0.859204	NA
212.009	15.2003	C5H9O7P	P-DPD	Level 2	Unmapped	1.18454	0.80833	0.55428	1.05147	0.114703	0.117611	0.115292	0.0583963
136.037	16.2812	C4H8O5	Erythronicacid	Level 2	Unmapped	1.07675	0.946966	0.500888	not detected	0.321269	0.0899733	0.133658	NA
125.048	16.121	C6H7NO2	3-Hydroxyaminophenol	Level 2	Unmapped	204.691	not detected	83.4036	not detected	0.0305688	NA	0.0798812	NA
284.142	4.38069	C18H20O3	16-Ketoestrone	Level 2	Unmapped	2.0777	0.344217	0.721463	not detected	0.457177	1.01032	0.910362	NA
424.037	14.6155	C14H18NO10S2	Sinalbin	Level 2	Unmapped	2.10961	1.17921	0.724181	not detected	0.0556935	0.159905	0.0980976	NA
465.309	5.09614	C26H43NO6	3a-7b-12a-Trihydroxyoxocholanyl-Glycine	Level 2	Unmapped	1.38601	0.816961	0.421691	not detected	0.135765	0.0534849	1.01302	NA
196.041	8.42122	C6H12O5S	1-thio-&beta;-D-glucose	Level 2	Unmapped	3.23056	1.27127	0.871908	not detected	0.51867	0.0808174	0.121209	NA
383.137	10.5651	C21H21NO6	(+)-Adlumine	Level 2	Unmapped	0.99705	0.955502	not detected	not detected	0.357419	0.167159	NA	NA
266.09	14.213	C12H14N2O5	p-aminobenzoyl glutamate	Level 2	Unmapped	1.69705	1.34347	not detected	not detected	0.422641	0.296608	NA	NA
422.234	3.72616	C20H38O7S	1,4-Bis(2-ethylhexyl) sulfosuccinate	Level 2	Unmapped	not detected	0.458801	not detected	not detected	NA	NA	NA	NA
