# Supplementary figures and images for: Plasmodium falciparum parasites deploy RhopH2 into the host erythrocyte to obtain nutrients, grow and replicate
Source: eLife journal article supplement (doi:10.7554/elife.23217), 2017-03-02

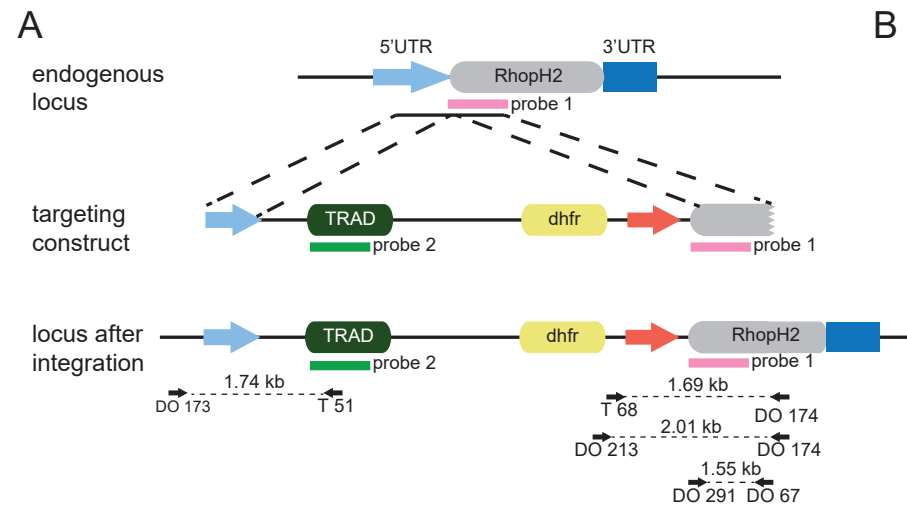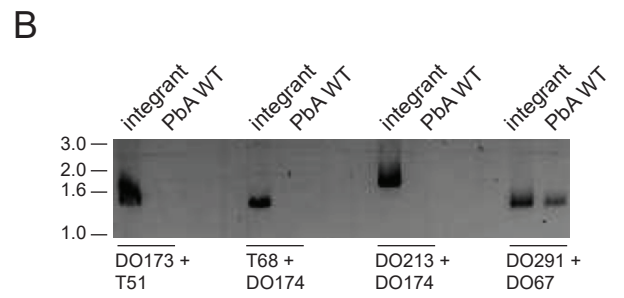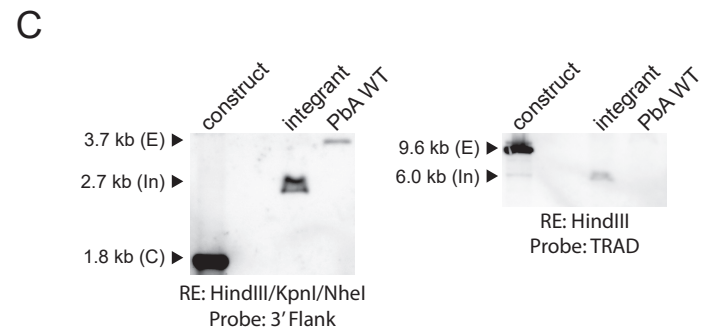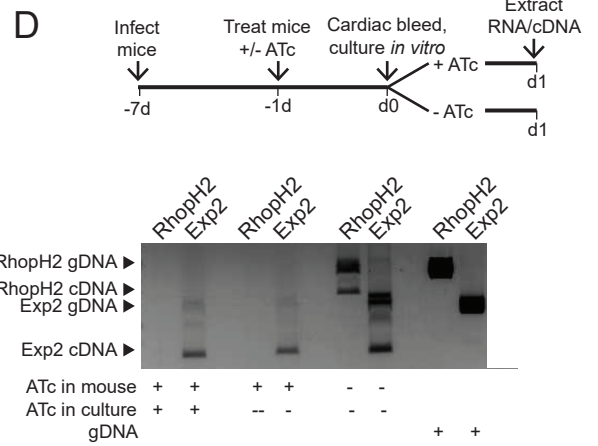

Supplement: supp [file elife-23217-supp-v1.zip]

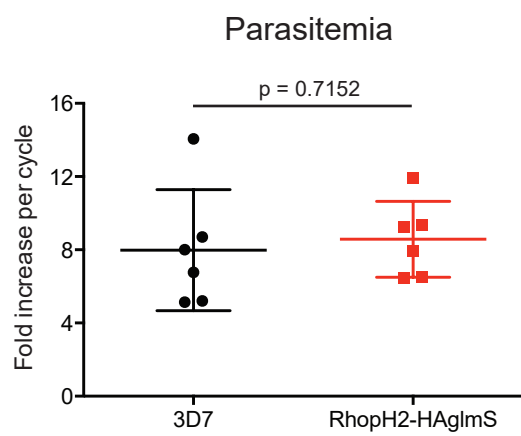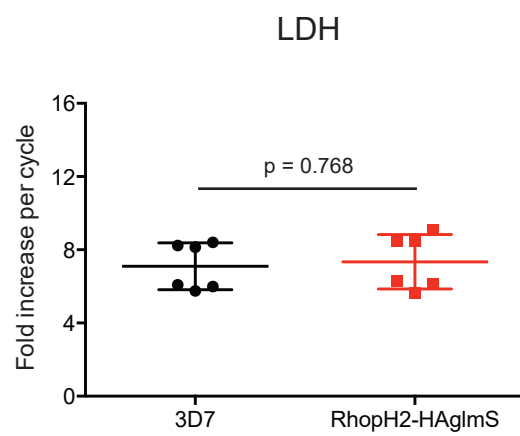

Supplement: supp [file elife-23217-supp-v1.zip]

**a**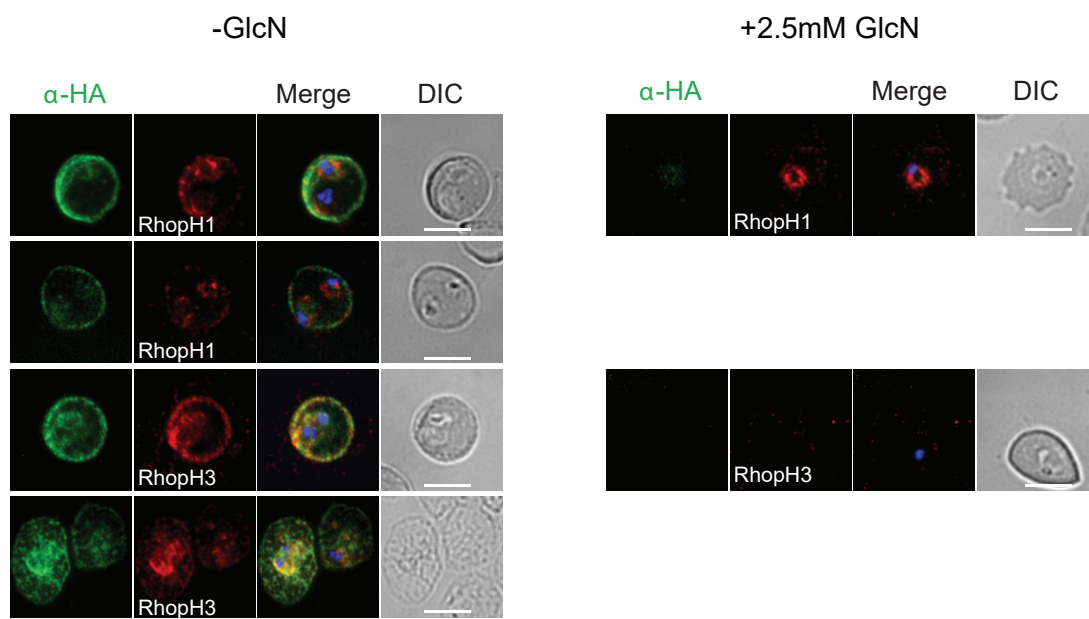

Supplement: supp [file elife-23217-supp-v1.zip]
